# Supplementary material
Source: publisher figshare collection journal article supplement (https://sage.figshare.com/ndownloader/files/36035099)
Supplement: Supplementary file 1 [file 36035099]

## Sheet: Stress & Coping
	NOTE:	Article #s refer to order from all included articles
		Coping is denoted in orange and blue, from support & coping literature reviews
ARTICLE #	YEAR	APA CITATION
6	2002	Rohrbaugh, M. J., Cranford, J. A., Shoham, V., Nicklas, J. M., Sonnega, J. S., & Coyne, J. C. (2002). Couples coping with congestive heart failure: Role and gender differences in psychological distress. Journal of Family Psychology, 16(1), 3-13. DOI:10.1037/0893-3200.16.1.3
19	2008	Badr, H., & Taylor, C. L. C. (2008). Effects of Relationship Maintenance on Psychological Distress and Dyadic Adjustment Among Couples Coping With Lung Cancer. Health Psychology, 27(5), 616–627. https://doi.org/10.1037/0278-6133.27.5.616
46	2015	Mitchell, A. M., Owen, J., Adelson, J. L., France, T., Inch, L. J., Bergen, C., & Lindel, A. (2015). The influence of dyadic coping in relationship education for low‐ income racial and ethnic minority couples. Journal of Family Therapy, 37(4), 492–508. https://doi.org/10.1111/1467-6427.12057
72	2018	Holzapfel, J., Randall, A., Tao, C., & Iida, M. (2018). Intercultural couples’ internal stress, relationship satisfaction, and dyadic coping. Interpersona : an International Journal on Personal Relationships, 12(2), 145–163. https://doi.org/10.5964/ijpr.v12i2.302
75	2019	Alves, S., Milek, A., Bodenmann, G., Fonseca, A., Canavarro, M., & Pereira, M. (2019). Romantic attachment, dyadic coping, and parental adjustment across the transition to parenthood. Personal Relationships, 26(2), 286–309. https://doi.org/10.1111/pere.12278
77	2019	Fallahchai, R., Fallahi, M., & Randall, A. (2019). A Dyadic Approach to Understanding Associations Between Job Stress, Marital Quality, and Dyadic Coping for Dual-Career Couples in Iran. Frontiers in Psychology, 10, 487–487. https://doi.org/10.3389/fpsyg.2019.00487
91	2021	Sarno, E. L., Bundy, C., Dyar, C., & Newcomb, M. E. (2021). Examining minority stress, dyadic coping, and internalizing symptoms among male same-sex couples using actor-partner interdependence models. Journal of Counseling Psychology. https://doi.org/10.1037/cou0000542
107	2011	Gremore, T. M., Baucom, D. H., Porter, L. S., Kirby, J. S., Atkins, D. C., & Keefe, F. J. (2011). Stress buffering effects of daily spousal support on women's daily emotional and physical experiences in the context of breast cancer concerns. Health Psychology, 30(1), 20–30. https://doi.org/10.1037/a0021798
112	2012	Halbesleben, J. R. B. (2010). Spousal support and coping among married coworkers: Merging the transaction stress and Conservation of Resources models. International Journal of Stress Management, 17(4), 384–406. https://doi.org/10.1037/a0020500
116	2013	Falconier, M. K., Nussbeck, F., & Bodenmann, G. (2013). Immigration stress and relationship satisfaction in Latino couples: The role of dyadic coping. Journal of Social and Clinical Psychology, 32(8), 813–843. https://doi.org/10.1521/jscp.2013.32.8.813
126	2015	O’Neal, C. W., Arnold, A. L., Lucier-Greer, M., Wickrama, K., & Bryant, C. M. (2015). Economic pressure and health and weight management behaviors in African American couples: A family stress perspective. Journal of Health Psychology, 20(5), 625–637. doi:10.1177/1359105315579797
129	2016	Caska-Wallace, C., Katon, J. G., Lehavot, K., McGinn, M. M., & Simpson, T. L. (2016). Posttraumatic stress disorder symptom severity and relationship functioning among partnered heterosexual and lesbian women veterans. LGBT Health, 3(3), 186-192. http://0-dx.doi.org.opac.unicatt.it/10.1089/lgbt.2015.0097
130	2016	Rollock D, Lui PP. Do spouses matter? Discrimination, social support, and psychological distress among Asian Americans. Cultur Divers Ethnic Minor Psychol. 2016 Jan;22(1):47-57. doi: 10.1037/cdp0000045. Epub 2015 Apr 13. PMID: 25867552.
133	2017	Clavél, F. D., Cutrona, C. E., & Russell, D. W. (2017). United and Divided by Stress: How Stressors Differentially Influence Social Support in African American Couples Over Time. Personality and Social Psychology Bulletin, 43(7), 1050–1064. https://doi.org/10.1177/0146167217704195
136	2017	Malinen, K., Rönkä, A., Sevón, E., & Schoebi, D. (2017). The difficulty of being a professional, a parent, and a spouse on the same day: Daily spillover of workplace interactions on parenting, and the role of spousal support. Journal of Prevention & Intervention in the Community, 45(3), 156-167. http://0-dx.doi.org.opac.unicatt.it/10.1080/10852352.2016.1198121
150	2019	Beach, S. R. H., Lei, M. K., Simons, R. L., Barr, A. B., Simons, L. G., Cutrona, C. E., et al. (2019). Perceived relationship support moderates the association of contextual stress with inflammation among african americans. Journal of Family Psychology, 33(3), 338-348. doi:http://0-dx.doi.org.opac.unicatt.it/10.1037/fam0000509
161	2021	McLeod, S., Berry, K., Taylor, P., & Wearden, A. (2021). Romantic attachment and support preferences in new mothers: The moderating role of stress. Journal of Social and Personal Relationships. https://doi.org/10.1177/0265407521990432
162	2021	Thomeer, M. B., Pollitt, A. M., & Umberson, D. (2021). Support in response to a spouse’s distress: Comparing women and men in same-sex and different-sex marriages. Journal of Social and Personal Relationships. https://doi.org/10.1177/0265407521998453
167	2004	Schulz, M. S., Cowan, P. A., Pape Cowan, C., & Brennan, R. T. (2004). Coming Home Upset: Gender, Marital Satisfaction, and the Daily Spillover of Workday Experience Into Couple Interactions. Journal of Family Psychology, 18(1), 250–263. https://doi.org/10.1037/0893-3200.18.1.250
173	2005	Bodenmann, G., & Cina, A. (2005). Stress and coping among stable-satisfied, stable-distressed and separated/divorced Swiss couples: A 5-year prospective longitudinal study. Journal of Divorce and Remarriage, 44(1-2), 71-89. DOI: 10.1300/J087v44n01_04
184	2010	Higgins, C. A., Duxbury, L. E., & Lyons, S. T. (2010). Coping with overload and stress: men and women in dual-earner families. Journal of Marriage and Family, 72(4), 847 – 859 . https://doi.org/10.1111/j.1741-3737.2010.00734.x
186	2010	Berger Cardoso, J., Padilla, Y. C., & Sampson, M. (2010). Racial and ethnic variation in the predictors of maternal parenting stress. Journal of Social Service Research, 36(5), 429-444. DOI: 10.1080/01488376.2010.510948
202	2015	Ardoino, G. I., Queirolo, E. I., Barg, G., Ciccariello, D. A., & Kordas, K. (2015). The relationship among depression, parenting stress and partner support in low-income women from Montevideo, Uruguay. Health Care for Women International, 36(4), 392-408. DOI: 10.1080/07399332.2013.852552
212	2018	Holzapfel, J., Randall, A., Tao, C., & Iida, M. (2018). Intercultural couples' internal stress, relationship satisfaction, and dyadic coping. Interpersona, 12(2), 145-163. doi:10.5964/ijpr.v12i2.302
214	2018	Feinstein, B. A., McConnell, E., Dyar, C., Mustanski, B., & Newcomb, M. E. (2018). Minority stress and relationship functioning among young male same-sex xouples: An examination of actor-partner interdependence models. Journal of Consulting and Clinical Psychology, 86(5), 416-426. http://dx.doi.org/10.1037/ccp0000296
215	2019	Beach, S. R. H., Lei, M. K., Simons, R. L., Barr, A. B., Simons, L. G., Cutrona, C. E., & Philibert, R. A. (2019). Perceived relationship support moderates the association of contextual stress with inflammation among African Americans. Journal of Family Psychology, 33(3), 338–348. https://doi.org/10.1037/fam0000509
220	2020	Brown, M., Whiting, J., Kahumoku-Fessler, E., Witting, A. B., & Jensen, J. (2020). A dyadic model of stress, coping, and marital satisfaction among parents of children with autism. Family Relations, 69(1), 138-150. DOI:10.1111/fare.12375
223	2021	Thomeer, M. B., Pollitt, A. M., & Umberson, D. (2021). Support in response to a spouse's distress: comparing women and men in same-sex and different-sex marriages. Journal of Social and Personal Relationships., 38(5), 1513-1534. https://doi.org/10.1177/0265407521998453
224	2021	Sarno, E., Bundy, C., Dyar, C., & Newcomb, M. E. (2021). Examining minority stress, dyadic coping, and internalizing symptoms among male same-sex couples using actor-partner interdependence models. Journal of Counseling Psychology. Advance online publication. http://dx.doi.org/10.1037/cou0000542
225	2021	Adams, A., & Golsch, K. (2021). Gender-specific patterns and determinants of spillover between work and family: The role of partner support in dual-earner couples. Journal of Family Research, 33(1), 72-97. https://doi.org/10.20377/jfr-373

## Sheet: Coping
	NOTE:	Article #s refer to order from all included articles
		Coping is denoted in orange and blue, from support & coping literature reviews
ARTICLE #	YEAR	APA CITATION
92	2001	Guendelman, S., Malin, C., Herr-Harthorn, B., & Vargas, P. N. (2001). Orientations to motherhood and male partner support among women in Mexico and Mexican-origin women in the United States. Social science & medicine (1982), 52(12), 1805–1813. https://doi.org/10.1016/s0277-9536(00)00296-3
93	2005	Lincoln, K. D., Chatters, L. M., & Taylor, R. J. (2005). Social Support, Traumatic Events, and Depressive Symptoms Among African Americans. Journal of Marriage and Family, 67(3), 754–766. https://doi.org/10.1111/j.1741-3737.2005.00167.x
94	2006	Stevens, N., & Westerhof, G. J. (2006). Partners and others: Social provisions and loneliness among married Dutch men and women in the second half of life. Journal of Social and Personal Relationships, 23(6), 921–941. https://doi.org/10.1177/0265407506070474
95	2006	Thorstad, R. R., Anderson, T. L., Hall, M. E., Willingham, M., & Carruthers, L. (2006). Breaking the Mold: A Qualitative Exploration of Mothers in Christian Academia and Their Experiences of Spousal Support. Journal of Family Issues, 27(2), 229-251. http://0-dx.doi.org.opac.unicatt.it/10.1177/0192513X05282189
96	2006	Edwards, M. R. (2006). The Role of Husbands' Supportive Communication Practices in the Lives of Employed Mothers. Marriage & Family Review, 40(4), 23-46. http://0-dx.doi.org.opac.unicatt.it/10.1300/J002v40n04_03
97	2006	Kulik, L., & Rayyan, F. (2006). Relationships between dual-earner spouses, strategies for coping with home-work demands and emotional well-being: Jewish and Arab-Muslim women in Israel. Community, Work & Family, 9(4), 457–477. https://doi.org/10.1080/13668800600925100
98	2006	Purdom, C. L., Lucas, J. L., & Miller, K. S. (2006). Couple type, parental status, and the mediating impact of social support. North American Journal of Psychology, 8(1), 1–12.
99	2008	Reiter, M. J., & Gee, C. B. (2008). Open communication and partner support in intercultural and interfaith romantic relationships: A relational maintenance approach. Journal of Social and Personal Relationships, 25(4), 539–559. https://doi.org/10.1177/0265407508090872
100	2008	Hoskins, L. M., Roy, K., Peters, J. A., Loud, J. T., & Greene, M. H. (2008). Disclosure of positive BRCA1/2-mutation status in young couples: The journey from uncertainty to bonding through partner support. Families, Systems, & Health, 26(3), 296-316. http://0-dx.doi.org.opac.unicatt.it/10.1037/a0012914
101	2009	Randall, G., Molloy, G. J., & Steptoe, A. (2009). The impact of an acute cardiac event on the partners of patients: A systematic review. Health Psychology Review, 3(1), 1–84. https://doi.org/10.1080/17437190902984919
102	2010	Wrubel, J., Stumbo, S., & Johnson, M. O. (2010). Male Same Sex Couple Dynamics and Received Social Support for HIV Medication Adherence. Journal of social and personal relationships, 27(4), 553–572. https://doi.org/10.1177/0265407510364870
103	2010	Ho, M.Y., Zhang, H., Lin, D., Lu, A., Bond, M.H., Chan, C. and Friedman, M. (2010), Saving graces: Impact of partner support and maternal attachment on partner attachments in an individualistic and a collectivist context. Asian Journal of Social Psychology, 13: 19-29. https://doi.org/10.1111/j.1467-839X.2010.01297.x
104	2011	Goldberg, A. E., & Smith, J. A. Z. (2011). Stigma, social context, and mental health: Lesbian and gay couples across the transition to adoptive parenthood. Journal of Counseling Psychology, 58(1), 139–150. https://doi.org/10.1037/a0021684
105	2011	Seiger, C., & Wiese, B. (2011). Social Support, Unfulfilled Expectations, and Affective Well-being on Return to Employment. Journal of Marriage and Family, 73(2), 446-458. Retrieved May 21, 2021, from http://www.jstor.org/stable/29789589
106	2011	Fagan, J., & Palkovitz, R. (2011). Coparenting and relationship quality effects on father engagement: Variations by residence, romance. Journal of Marriage and Family, 73(3), 637–653. https://doi.org/10.1111/j.1741-3737.2011.00834.x
108	2011	Choi, N. G., & Ha, J. H. (2011). Relationship between spouse/partner support and depressive symptoms in older adults: gender difference. Aging & mental health, 15(3), 307–317. https://doi.org/10.1080/13607863.2010.513042
109	2011	Pedersen, A. F., Olesen, F., Hansen, R. P., Zachariae, R., & Vedsted, P. (2011). Social support, gender and patient delay. British journal of cancer, 104(8), 1249–1255. https://doi.org/10.1038/bjc.2011.87
110	2011	Mäkelä, L., Känsälä, M., & Suutari, V. (2011). The roles of expatriates' spouses among dual career couples. Cross Cultural Management, 18(2), 185–197. https://doi.org/10.1108/13527601111126012
111	2012	Edwards, R. C., Thullen, M. J., Isarowong, N., Shiu, C., Henson, L., & Hans, S. L. (2012). Supportive relationships and the trajectory of depressive symptoms among young, african american mothers. Journal of Family Psychology, 26(4), 585-594. doi:http://0-dx.doi.org.opac.unicatt.it/10.1037/a0029053
113	2013	Jovanovic, A., & Wallace, J. E. (2013). Lean on me: An exploratory study of the spousal support received by physicians. Psychology, Health & Medicine, 18(5), 543-551. http://0-dx.doi.org.opac.unicatt.it/10.1080/13548506.2013.765018
114	2013	Maree, Johanna & Mosalo, A & Wright, S.C.D.. (2013). 'It depends on how the relationship was before you became ill': Black South African women's experiences of life partner support through the trajectory of cervical cancer. European journal of cancer care. 22. 10.1111/ecc.12051.
115	2013	Jensen, J. F., Rauer, A. J., & Volling, B. (2013). A dyadic view of support in marriage: The critical role of men’s support provision. Sex Roles: A Journal of Research, 68(7-8), 427-438. http://0-dx.doi.org.opac.unicatt.it/10.1007/s11199-012-0256-x
117	2013	Goff, J. D., & Carolan, M. T. (2013). The Intersection of Gender and Culture in Chinese International Student Couples. Journal of Feminist Family Therapy, 25(3), 141-164. http://0-dx.doi.org.opac.unicatt.it/10.1080/08952833.2013.777879
118	2014	Brock, R. L., O'Hara, M. W., Hart, K. J., McCabe, J. E., Williamson, J. A., Laplante, D. P., et al. (2014). Partner support and maternal depression in the context of the iowa floods. Journal of Family Psychology, 28(6), 832-843. doi:http://0-dx.doi.org.opac.unicatt.it/10.1037/fam0000027
119	2014	Forehand, R., Parent, J., Golub, A., & Reid, M. (2014). Correlates of male cohabiting partner’s involvement in child-rearing tasks in low-income urban Black stepfamilies. Journal of Family Psychology, 28(3), 336–345. https://doi.org/10.1037/a0036369
120	2014	Heikkinen, S., Lämsä, A., & Hiillos, M. (2014). Narratives by women managers about spousal support for their careers. Scandinavian Journal of Management, 30(1), 27-39. http://0-dx.doi.org.opac.unicatt.it/10.1016/j.scaman.2013.04.004
121	2014	Okonkwo, E. (2014). Female nurses experiencing family strain interference with work: Spousal support and number of children impacts. Gender & Behaviour, 12(1), 6182-6188. https://0-www-proquest-com.opac.unicatt.it/scholarly-journals/female-nurses-experiencing-family-strain/docview/1605986653/se-2?accountid=9941
122	2014	Miller-Martinez, D., Seeman, T., Karlamangla, A. S., Greendale, G. A., Binkley, N., & Crandall, C. J. (2014). Marital histories, marital support, and bone density: findings from the Midlife in the United States Study. Osteoporosis international : a journal established as result of cooperation between the European Foundation for Osteoporosis and the National Osteoporosis Foundation of the USA, 25(…
123	2014	O'Brien, K. M., Ganginis Del Pino, H. V., Yoo, S.-K., Cinamon, R. G., & Han, Y.-J. (2014). Work, family, support, and depression: Employed mothers in Israel, Korea, and the United States. Journal of Counseling Psychology, 61(3), 461–472. https://doi.org/10.1037/a0036339
124	2015	Goldenberg, T., & Stephenson, R. (2015). "The more support you have the better": partner support and dyadic HIV care across the continuum for gay and bisexual men. Journal of acquired immune deficiency syndromes (1999), 69 Suppl 1(0 1), S73–S79. https://doi.org/10.1097/QAI.0000000000000576
125	2015	Choi, S. E., Lee, J. J., Park, J. J., & Sarkisian, C. A. (2015). Spousal support in diabetes self-management among Korean immigrant older adults. Research in gerontological nursing, 8(2), 94–104. https://doi.org/10.3928/19404921-20141120-01
127	2015	Villeneuve, L., Trudel, G., Préville, M., Dargis, L., Boyer, R., & Bégin, J. (2015). Dyadic Adjustment Scale: a validation study among older French-Canadians living in relationships. Canadian journal on aging = La revue canadienne du vieillissement, 34(1), 26–35. https://doi.org/10.1017/S0714980814000269
128	2015	Thomeer, M. B., Reczek, C., & Umberson, D. (2015). Relationship dynamics around depression in gay and lesbian couples. Social Science and Medicine, 147, 38. https://0-www-proquest-com.opac.unicatt.it/scholarly-journals/relationship-dynamics-around-depression-gay/docview/1758940003/se-2?accountid=9941
131	2016	Ahmed, S. F., & Carrim, N. M. H. (2016). Indian husbands' support of their wives' upward mobility in corporate South Africa: Wives' perspectives. SA Journal of Industrial Psychology, 42(1), 1-13. http://0-dx.doi.org.opac.unicatt.it/10.4102/sajip.v42i1.1354
132	2017	Zhang, J., Yu, N. X., Zhou, M., & Zhang, J. (2017). Dyadic effects of resilience on well-being in chinese older couples: Mediating role of spousal support. Journal of Family Psychology, 31(3), 273-281. doi:http://0-dx.doi.org.opac.unicatt.it/10.1037/fam0000250
134	2017	Carr, D., Cornman, J. C., & Freedman, V. A. (2017). Disability and activity-related emotion in later life: Are effects buffered by intimate relationship support and strain? Journal of Health and Social Behavior, 58(3), 387-403. http://0-dx.doi.org.opac.unicatt.it/10.1177/0022146517713551
135	2017	Heikkinen, S., & Lämsä, A. (2017). Narratives of spousal support for the careers of men in managerial posts. Gender, Work and Organization, 24(2), 171-193. https://doi.org/10.1111/gwao.12157
137	2017	Grau, J. M., Castellanos, P., Smith, E. N., Duran, P. A., Silberman, S., & Wood, L. (2017). Psychological Adjustment among Young Puerto Rican Mothers: Perceived Partner Support and the Moderating Role of Latino Cultural Orientation. Journal of Latina/o psychology, 5(1), 45–60. https://doi.org/10.1037/lat0000064
138	2017	Almutairi, A. F., Salam, M., Alanazi, S., Alweldawi, M., Alsomali, N., & Alotaibi, N. (2017). Impact of help-seeking behavior and partner support on postpartum depression among Saudi women. Neuropsychiatric Disease and Treatment, 13, 8. https://0-www-proquest-com.opac.unicatt.it/scholarly-journals/impact-help-seeking-behavior-partner-support-on/docview/1928291149/se-2?accountid=9941
139	2017	DePasquale, N., Polenick, C. A., Davis, K. D., Moen, P., Hammer, L. B., & Almeida, D. M. (2017). The Psychosocial Implications of Managing Work and Family Caregiving Roles: Gender Differences Among Information Technology Professionals. Journal of family issues, 38(11), 1495–1519. https://doi.org/10.1177/0192513X15584680
140	2018	Ross, L. E., Goldberg, A. E., Tarasoff, L. A., & Guo, C. (2018). Perceptions of partner support among pregnant plurisexual women: A qualitative study. Sexual and relationship therapy : journal of the British Association for Sexual and Relationship Therapy, 33(1-2), 59–78. https://doi.org/10.1080/14681994.2017.1419562
141	2018	Jowett, A. (2018). Gendered accounts of managing diabetes in same-sex relationships: A discursive analysis of partner support. Health, 22(2), 147–164. https://doi.org/10.1177/1363459316688518
142	2018	Tornello Samantha, L., Katya, I., & Bos, H. M. W. (2018). Same-Sex and Mixed-Sex Couples in the Netherlands: The Association Between Life Satisfaction and Relationship Dynamics. Journal of Family Issues, 39(6), 1443-1464. http://0-dx.doi.org.opac.unicatt.it/10.1177/0192513X17710771
143	2018	Tan, J. Y., Campbell, C. K., Conroy, A. A., Tabrisky, A. P., Kegeles, S., & Dworkin, S. L. (2018). Couple-Level Dynamics and Multilevel Challenges Among Black Men Who Have Sex with Men: A Framework of Dyadic HIV Care. AIDS patient care and STDs, 32(11), 459–467. https://doi.org/10.1089/apc.2018.0131
144	2018	Faw, M. H., Harvey, J., & Feng, H. (2018). A Replication of Xu & Burleson (2001) "Effects of Sex, Culture, and Support Type on Perceptions of Spousal Social Support: An Assessment of the 'Support Gap' Hypothesis in Early Marriage". Communication Studies, 69(3), 314-325. http://0-dx.doi.org.opac.unicatt.it/10.1080/10510974.2018.1464043
145	2018	Bernard, O., Gibson, R. C., McCaw-Binns, A., Reece, J., Coore-Desai, C., Shakespeare-Pellington, S., & Samms-Vaughan, M. (2018). Antenatal depressive symptoms in Jamaica associated with limited perceived partner and other social support: A cross-sectional study. PloS one, 13(3), e0194338. https://doi.org/10.1371/journal.pone.0194338
146	2018	Gall, T. L., & Bilodeau, C. (2018). The role of relationship with God in couples’ adjustment to the threat of breast cancer. Psychology of Religion and Spirituality, 10(4), 375–385. https://doi.org/10.1037/rel0000224
147	2018	Park, W., & Kim, J. (2018). How Are Money Worries Affecting Middle-Aged, Young-Old, and Old–Old People’s Perceived Couple Relationship? Journal of Family and Economic Issues, 39(1), 34-48. http://0-dx.doi.org.opac.unicatt.it/10.1007/s10834-017-9547-2
148	2019	Kogan, S. M., Allen, K. A., Gonzales-Backen, M., Bae, D., & Cho, J. (2019). Romantic relationships among emerging adult African-American men: A latent profile analysis. Journal of Social and Personal Relationships, 36(7), 2036–2054. https://doi.org/10.1177/0265407518776130
149	2019	Fagan, J., & Palkovitz, R. (2019). Coparenting and father engagement among low-income parents: Actor–partner interdependence model. Journal of Family Psychology, 33(8), 894-904. doi:http://0-dx.doi.org.opac.unicatt.it/10.1037/fam0000563
150	2019	Beach, S. R. H., Lei, M. K., Simons, R. L., Barr, A. B., Simons, L. G., Cutrona, C. E., et al. (2019). Perceived relationship support moderates the association of contextual stress with inflammation among african americans. Journal of Family Psychology, 33(3), 338-348. doi:http://0-dx.doi.org.opac.unicatt.it/10.1037/fam0000509
151	2019	Muruthi, J. R., Zalla, L. C., & Lewis, D. C. (2019). Depressive Symptoms Among Aging Hispanic Americans: Longitudinal Effects of Positive Spousal Support and Previous Depressive Symptoms. Journal of Aging and Health, 089826431982575. doi:10.1177/0898264319825755
152	2019	Mohamed, S. F. (2019). Wives’ career progression among dual-career ethno-cultural couples: Husbands’ perspectives. Journal of Psychology in Africa, 29(1), 39-42. http://0-dx.doi.org.opac.unicatt.it/10.1080/14330237.2019.1568085
153	2019	Monin, J. K., Manigault, A., Levy, B. R., Schulz, R., Duker, A., Clark, M. S., Van Ness, P. H., & Kershaw, T. (2019). Gender differences in short-term cardiovascular effects of giving and receiving support for health concerns in marriage. Health psychology : official journal of the Division of Health Psychology, American Psychological Association, 38(10), 936–947. https://doi.org/10.1037/hea00007…
154	2019	Stafford, M., Antonucci, T. C., & Zaninotto, P. (2019). Joint Trajectories of Spousal Social Support and Depressive Symptoms in Older Age. Journal of aging and health, 31(5), 760–782. https://doi.org/10.1177/0898264317747077
155	2019	Beard, E., Honey, A., Hancock, N., Awram, R., Miceli, M., & Mayes, R. (2019). What roles do male partners play in the mothering experiences of women living with mental illness? A qualitative secondary analysis. BMC Psychiatry, 19, 1-12. http://0-dx.doi.org.opac.unicatt.it/10.1186/s12888-019-2209-1
156	2020	McNeil Smith, S., Williamson, L. D., Branch, H., & Fincham, F. D. (2020). Racial discrimination, racism-specific support, and self-reported health among African American couples. Journal of Social and Personal Relationships, 37(3), 779–799. https://doi.org/10.1177/0265407519878519
157	2020	Bae, D., & Kogan, S. M. (2020). Romantic relationship trajectories among young african american men: The influence of adverse life contexts. Journal of Family Psychology, 34(6), 687-697. doi:http://0-dx.doi.org.opac.unicatt.it/10.1037/fam0000645
158	2020	Dickson, M. (2020). “he’s not good at sensing that look that says, i’m drowning here!” academic mothers’ perceptions of spousal support. Marriage & Family Review, http://0-dx.doi.org.opac.unicatt.it/10.1080/01494929.2020.1712302
159	2020	Gao, L., Liu, J., Zhou, X., Su, Y., & Wang, P. (2020). Supporting her as the situation changes: A qualitative study of spousal support strategies for patients with breast cancer in China. European Journal of Cancer Care, 29(1), 10. http://0-dx.doi.org.opac.unicatt.it/10.1111/ecc.13176
160	2020	Uysal, I. D., Kalkışım Kübra, & Muazzez, Y. (2020). Emotional Support Makes the Difference: Work-Family Conflict and Employment Related Guilt Among Employed Mothers. Sex Roles, 82(1-2), 53-65. http://0-dx.doi.org.opac.unicatt.it/10.1007/s11199-019-01035-x
163	2021	August, K. J., Kelly, C. S., & Markey, C. H. (2021). Reciprocity and personality in diet-related spousal involvement among older couples managing diabetes: The role of gender. Journal of Social and Personal Relationships, 38(1), 363–383. https://doi.org/10.1177/0265407520962850
164	2021	Perlowski, K. M., & Wright, L. E. (2021). The influence of perceived job flexibility and spousal support on the marital satisfaction of parents of children with special needs. Community, Work & Family, 24(1), 1-19. http://0-dx.doi.org.opac.unicatt.it/10.1080/13668803.2019.1608158
165	2021	Thomeer, M. B., & Kirsten, O. C. (2021). The development of gendered health-related support dynamics over the course of a marriage. Journal of Women & Aging, 33(2), 153-169. http://0-dx.doi.org.opac.unicatt.it/10.1080/08952841.2020.1826624
166	2003	Cohan, C. L., Booth, A., & Granger, D. A. (2003). Gender moderates the relationship between testosterone and marital interaction. Journal of Family Psychology, 17(1), 29–40. https://doi.org/10.1037/0893-3200.17.1.29
168	2004	Bodenmann, G., Charcoz, L., Widmer, K., & Bradbury, T. (2004). Differenes in individual and dyadic coping among low and high depressed, partially remitted, and nondepressed persons. Journal of Psychopathology & Behavioral Assessment, 26(2), 75-85. DOI: 10.1023/B:JOBA.0000013655.45146.47
169	2004	Weller, J. E., & Dziegielewski, S. F. (2004). The relationship between romantic partner support styles and body image distrurbance. Journal of Human Behavior in the Social Environment, 10(2), 71-92. DOI: 10.1300/J137v10n02_04
170	2005	Badr, H. (2004). Coping in marital dyads: A contextual perspective on the role of gender and health. Personal Relationships, 11(2), 197–211. https://doi-org.libdata.lib.ua.edu/10.1111/j.1475-6811.2004.00078.x
171	2005	Badr, H., & Acitelli, L. K. (2005). Dyadic Adjustment in Chronic Illness: Does Relationship Talk Matter? Journal of Family Psychology, 19(3), 465–469. https://doi.org/10.1037/0893-3200.19.3.465
172	2005	Darbes, L. A., & Lewis, M. A. (2005). HIV-specific social support predicts less sexual risk behavior in gay male couples. Health Psychology, 24(6), 617-622. DOI: 10.1037/0278-6133.24.6.617
174	2008	Wierda-Boer, H. H., Gerris, J. R. M., & Vermulst, A. A. (2008). Adaptive strategies, gender ideology, and work-family balance among Dutch dual earners. Journal of Marriage and Family, 70(4), 1004–1014. https://doi.org/10.1111/j.1741-3737.2008.00542.x
175	2008	Reiter, M. J., & Gee, C. B. (2008). Open communication and partner support in intercultural and interfaith romantic relationships: a relational maintenance approach. Journal of Social and Personal Relationships, 25(4), 539-559. DOI: 10.1177/0265407508090872
176	2008	Berg, C. A., & Upchurch, R. (2008). A developmental-contextual model of couples coping with chronic illness across the adult life span. Psychological Bulletin, 133(6), 920-954. DOI: 10.1037/0033-2909.133.6.920
177	2008	Berg, C. A., Wiebe, D. J., Butner, J., Bloor, L., Bradstreet, C., Upchurch, R., Hayes, J., Stephenson, R., Nail, L., & Patton, G. (2008). Collaborative coping and daily mood in couples dealing with prostate cancer. Psychology and Aging, 23(3), 505-516. http://dx.doi.org/10.1037/a0012687
178	2008	Hoskins, L. M., Roy, K., Peters, J. A., Loud, J. T., & Greene, M. H. (2008). Disclosure of positive-mutation status in young couples: the journey from uncertainty to bonding through partner support. Families, Systems & Health: The Journal of Collarborative Family HealthCare, 26(3), 296-316. DOI: 10.1037/a0012914
179	2008	BeLue, R., Schreiner, A. S., Taylor-Richardson, K., Murray-Kolb, L. E., & Beard, J. L. (2008). What matters most: an investigation of predictors of perceived stress among young mothers in Khayelitsha. Health Care for Women International, 29(6), 638-648. DOI: 10.1080/07399330802089198
180	2008	Patel, C. J., Beekhan, A., Paruk, Z., & Ramgoon, S. (2008). Work-family conflict, job satisfaction and spousal support: an exploratory study of nurses' experience. Curations, 31(1), 38-44. DOI: 10.4102/curationis.v31i1.906
181	2009	Barry, R. A., Bunde, M., Brock, R. L., & Lawrence, E. (2009). Validity and utility of a multidimensional model of received support in intimate relationships. Journal of Family Psychology, 23(1), 48–57. https://doi.org/10.1037/a0014174
182	2009	Pinquart, M., & Fabel, K. (2009). Social change demands, coping and intimate relationship development among German adolescents and adults. Journal of Social and Personal Relationships, 26(6-7), 793-810. DOI: 10.1177/0265407509347933
183	2010	Goldberg, A. E., Smith, J. Z., & Kashy, D. A. (2010). Preadoptive factors predicting lesbian, gay, and heterosexual couples' relationship quality across the transition to adoptive parenthood. Journal of Family Psychology, 24(3), 221–232. https://doi.org/10.1037/a0019615
185	2010	Man, Y. H., Hong, Z., Dan, L., Aitao, L., Bond, M. H., Clare, C., & Friedman, M. (2010). Saving graces: impact of partner support and maternal attachment on partner attachments in an individualistic and a collectivist context. Asian Hournal of Social Psychology, 13(1), 19-29. DOI: 10.1111/j.1467-839X.2010.01297.x
187	2010	Ungureanu, I., & Sandberg, J. G. (2010). "Broken together": spirituality and religion as coping strategies for couples dealing with the death of a child: a literature review with clinical implications. Contemporary Family Therapy: An International Journal, 32(3), 302-319. DOI: 10.1007/s10591-010-9120-8
188	2010	Ho, M. Y., Zhang, H., Lin, D., Lu, A., Bond, M. H., Chan, C., & Friedman, M. (2010). Saving graces: impact of partner support and maternal attachment on partner attchments in an individualistic and a collectivist context. Asian Journal of Social Psychology, 13(1), 19-29. DOI: 10.1111/j.1467-839X.2010.01297.x
189	2011	Sherman, A. M., Skrzypek, A., Bell, R., Tatum, C., & Paskett, E. D. (2011). The contribution of social support and social strain to depressive symptoms in African American, Natice American and European American women. Journal of Social and Personal Relationships, 28(8), 1104-1129. DOI: 10.1177/0265407511406895
190	2011	Choi, N. G., & Ha, J.-H. (2011). Relationship between spouse/partner support and depressive symptoms in older adults: gender difference. Aging & Mental Health, 15(3), 307-317. DOI: 10.1080/13607863.2010.513042
191	2011	Kuenzler, A., Hodgkinson, K., Zindel., A., Bargetzi, M., & Znoj, H. J. (2011). Who cares, who bears, who benefits? Female spouses vivariously carry the burden after cancer diagnosis. Psychology & Health, 26(3), 337-352. DOI: 10.1080/08870440903418877
192	2012	Monin, J., Manigault, A., Levy, B. R., Schulz, R., Duker, A., Clark, M. S., Van Ness, P. H., & kershaw, T. (2012). Health Psychology, 38(10), 936-947. http://dx.doi.org/10.1037/hea0000777
193	2013	Penning, M. & Wu, Z. (2013). Intermarriage and social support among Canadians in middle and later life. Journal of Marriage and Family, 75(4), 1044-1064. https://doi.org/10.1111/jomf.12050
194	2013	Falconier, M. K., Nussbeck, F. & Bodenmann, G. (2013). Dyadic coping in Latino couples: validity of the Spanish version of the Dyadic Coping Inventory, Anxiety, Stress & Coping, 26(4), 447-466. https://doi.org/10.1080/10615806.2012.699045
195	2013	Falconier, M. K. (2013). Traditional gender role orientation and dyadic coping in immigrant latino couples: effects on couple functioning. Family Relations, 62(2), 269-283. DOI: 10.1111/fare.12002
196	2013	Meuwly, N., Feinstein, B. A., Davila, J., Nuñez, D. G., & Bodenmann, G. (2013). Relationship quality among Swiss women in opposite-sex versus same-sex romantic relationships. Swiss Journal of Psychology, 72(4), 229-233. http://dx.doi.org/10.1024/1421-0185/a000115
197	2014	Brock, R. L., O'Hara, M. W., Hart, K. J., McCabe, J. E., Williamson, J. A., Laplante, D. P., Yu, C., & King, S. (2014). Partner support and maternal depression in the context of the Iowa floods. Journal of Family Psychology, 28(6), 832–843. https://doi.org/10.1037/fam0000027
198	2014	Monin, J., Zhou, L., & Kershaw, T. (2014). Attachment and psychological heath in older couples coping with pain. GeroPsych: The Journal of Gerontopsychology and Geriatric Psychiatry, 27(3), 115-127. http://dx.doi.org/10.1024/1662-9647/a000110
199	2015	Rosenthal, L., & Starks, T. J. (2015). Relationship stigma and relationship outcomes in interracial and same-sex relationships: Examination of sources and buffers. Journal of Family Psychology, 29(6), 818–830. https://doi.org/10.1037/fam0000116
200	2015	Cao, H., Fang, X., Fine, M. A., Ju, X., Lan, J., & Liu, X. (2015). Beyond the average marital communication: Latent profiles of the observed interactions among Chinese newlywed couples. Journal of Family Psychology, 29(6), 850–862. https://doi.org/10.1037/fam0000126
201	2015	Mitchell, A. M., Owen, J., Adelson, J. L., France, T., Inch, L., Bergen, C., & Lindel, A. (2015). The influence of dyadic coping in relationship education for low-income racial and ethnic minority couples. Journal of Family Therapy, 37(4), 492-508. doi: 10.1111/1467-6427.12057
203	2016	van der Wulp, N. Y., Hoving, C., & Vries, H. (2016). Correlates of partner support to abstain from prenatal alcohol use: a cross-sectional surbey among Dutch partners of pregnant women. Health & Social Care in the Community, 24(5), 614-633. DOI: 10.1111/hsc.12235
204	2016	Johnson, M. D., Horne, R. M., & Galovan, A. M. (2016). The developmental course of supportive dyadic coping in couples. Developmental Psychology, 52(12), 2031-2043. http://dx.doi.org/10.1037/dev0000216
205	2016	Gamarel, K. E., Comfort, M., Wood, T., Neilands, T. B., & Johnson, M. O. (2016). A qualitative analysis of male couples' coping with HIV: disentangling the "we". Journal of Health Psychology, 21(10), 2125-2137. DOI: 10.1177/1359105315571975
206	2017	Zhang, J., Yu, N. X., Zhou, M., & Zhang, J. (2017). Dyadic effects of resilience on well-being in Chinese older couples: Mediating role of spousal support. Journal of Family Psychology, 31(3), 273–281. https://doi.org/10.1037/fam0000250
207	2017	Lyons, A. & Pepping, C. A. (2017). Prospective effects of social support on internalized homonegativity and sexual identity concealment among middle-agedand older gay men: a longitudinal cohort study, Anxiety, Stress, & Coping, 30(5), 585-597. https://doi.org/10.1080/10615806.2017.1330465
208	2017	Ellis, L., & Davis, M. (2016). Intimate partner support: a comparison of gay, lesbian and heterosexual relationships. Personal Relationships, 24(2), 350-369. https://doi.org/10.1111/pere.12186
209	2017	Radunovich, H. L., Smith, S. R., Ontai, L., Hunter, C., & Cannella, R. (2017). The role of partner support in the physical and mental health of poor, rural mothers. Journal of Rural Mental Health, 41(4), 237-247. http://dx.doi.org/10.1037/rmh0000077
210	2017	Grau, J. M., Castellanos, P., Smith, E. N., Duran, P. A., Silberman, S., & Wood, L. (2017). Psychological adjustment among young Puerto Rican mothers: perceived partner support and the moderating role of Latino cultural orientation. Journal of Latinx Psychology, 5(1), 45-60. http://dx.doi.org/10.1037/lat0000064
211	2017	Sidebottom, A., Hellerstedt, W., Harrison, P., & Jones-Webb, R. (2017). Prenatal care: associations with prenatal depressive symptoms and social support in low-income urban women. Archives of Women's Mental Health, 20(5), 633-644. DOI: 10.1007/s00737-017-0730-0
213	2018	Alves, S., Fonseca, A., Canavarro, M. C., & Pereira, M. (2018). Dyadic coping and dyadic adjustment in couples with women with high depressive symptoms during pregnancy. Journal of Reproductive & Infant Psychology, 36(5), 504-518. https://doi.org/10.1080/02646838.2018.1490496
216	2019	Molgora, S., Fenaroli, V., Saita, E., & Acquati, C. (2019). Dyadic coping and marital adjustment during pregnancy: a cross-sectional study of Italian couples expecting their first child. International Journal of Psychology, 54(2), 277-285. DOI: 10.1002/ijop.12476
217	2019	Monin, J. K., Manigault, A., Levy, B. R., Schulz, R., Duker, A., Clark, M. S., Van Ness, P. H., & Kershaw, T. (2019). Gender differences in short-term cardiovascular effects of giving and receiving support for health concerns in marriage. Health Psychology, 38(10), 936-947. http://dx.doi.org/10.1037/hea0000777
218	2020	Ross, A. M., DeVoe, E. R., Steketee, G., Emmert-Aronson, B. O., Brown, T., & Muroff, J. (2020). Outcomes of a reflective parenting program among military spouses: The moderating role of social support. Journal of Family Psychology, 34(4), 402–413. https://doi.org/10.1037/fam0000637
219	2020	Shujja, S., Adil, A., Randall, A. K., Bodenmann, G., & Malik, F. (2020). Psychometric properties and validity of dyadic coping inventory-Urdu version for use in Pakistan. An International Journal on Personal Relationships, 14(2), 183-199. https://doi.org/10.5964/ijpr.v14i2.4069
221	2020	Kwon, S. (2020). Perceived neighborhood disorder and psychological distress among Latino adults in the United States: considering spousal/partner relationship. Journal of Community Psychology, 48(3), 726-743.https://publons.com/publon/10. 1002/jcop.22288
222	2021	August, K. J., Kelly, C. S., & Markey, C. H. (2021). Reciprocity and personality in diet-related spousal involvement among older couples managing diabetes: the role of gender. Journal of Social and Personal Relationships, 38(1), 363-383. https://doi.org/10.1177/0265407520962850

## Sheet: Article List
	TOPIC	AUTHOR(S) /YEAR	AGE/COHORT	GENDER	SEXUAL ORIENTATION	ABILITY STATUS	RACE/ETHNICITY	RELIGION	EDUCATION	OCCUPATION	SES	GEOGRAPHICAL LOCATION	RELATIONSHIP STATUS	PARENTAL STATUS	PARTICIPANT LOCATION	ROLE OF SAMPLE CHARACTERISTICS	AUTHOR GEOGRAPHIC LOCATION	THEORETICAL APPROACH	INTERSECTIONALITY OF RESEARCH QUESTION(S)
CODING	(0 = stress; 1 = stress, support, coping)		0= not of focus; 1 = focus												0 = all from Canada/US; 1 = all from other Western countries; 2 = all from a non-Western country	0 = basic science; 1 = generalizability; 2 = population specific	0 = United States; 1 = English-speaking country; 2 = Europe; 3 = Asia	1 = Family Stress; 2 = VSA; 3 = Minority Stress; 4 = Social Support/Dyadic Coping; 5 = Other	0 = demographics reported, not central; 1 = identity was central to investigation, single identities examined; 2 = intersection of multiple identities
y	0	Barton, A. W., & Bryant, C. M. (2016)	0	0	0	0	1	0	0	0	1	0	1	0	0	1	0	1, 2	1
	0	Blom, N. et al. (2020)	0	1	0	0	0	0	1	1	0	0	0	0	1	0	3	1, 5	2
	0	Blumenstock, S. M., & Papp, L. M. (2017)	0	0	0	0	1	0	0	0	1	0	1	1	0	2	0	1	1
	0	Bodenmann, G. et al. (2007)	0	1	0	0	0	0	0	0	0	1	0	0	3	1	3	1,2	1
	0	Cutrona, C. et al. (2003)	0	0	0	0	1	0	0	0	1	1	1	0	0	1	0	1	1
	0	Donnelly, R. et al. (2018)	0	1	1	0	0	0	0	0	0	0	0	0	0	2	0	1, 5	2
	0	Doyle, D. M., & Molix, L. (2014)	0	0	1	0	1	0	0	0	0	0	0	0	0	1	0	1, 5	1
	0	Drabe, N. et al. (2013)	0	1	0	1	0	0	0	0	0	0	0	0	1	2	1	5	2
	0	Falconier, M., & Epstein, N. (2010)	0	0	0	0	0	0	0	0	1	1	0	0	1	1	0	1	1
	0	Falconier, M., & Epstein, N. (2011)	0	1	0	0	0	0	0	0	1	1	0	0	0	1	0	1	2
	0	Gonçalves, J. A. R. et al. (2019)	1	1	1	0	0	0	0	0	0	1	0	0	1	2	1	3	2
	0	Helms, H. et al. (2014)	0	1	0	0	1	0	0	0	1	1	0	0	0	2	0	5	2
	0	Jibeen, T. (2019)	0	1	0	0	1	0	0	0	0	0	0	0	0	1	2	5	1
	0	Johnson, M. D. et al., 2019	0	1	0	0	1	0	0	0	0	1	0	0	1	2	3	1, 3, 5	1
	0	Kelly, S., & Floyd, F. J. (2006)	0	0	0	0	1	1	0	0	1	0	1	0	0	2	0	5	2
	0	Kerr, J. et al. (2018)	0	1	0	0	1	0	0	0	1	0	1	0	0	2	0	2	2
	0	Khawaja, N. G., & Milner, K. (2012)	0	1	0	0	1	0	0	0	0	1	0	0	1	2	1	5	2
	0	Kinnunen, U., & Feldt, T. (2004)	0	1	0	0	0	0	0	0	1	1	0	0	1	2	1	1	2
	0	Kwon, H. et al. (2003)	0	0	0	0	0	0	0	0	1	1	1	0	2	2	3	1	2
	0	Lee, S. et al. (2020)	0	1	0	1	0	0	0	0	1	0	0	0	0	0	0	1, 2, 5	2
	0	Lincoln, K. D., & Chae, D. H. (2010)	0	0	0	0	1	0	0	0	1	0	1	0	0	2	0	5	2
	0	Lu, A. et al. (2019)	0	1	1	0	0	0	0	0	0	0	0	0	0	2	3	3	2
	0	Puckett, J. A. et al. (2017)	1	0	1	0	0	0	0	0	0	0	0	0	0	2	0	3	1
	0	Remien, R. H. et al. (2003)	0	0	1	1	0	0	0	0	0	0	0	0	0	2	0	5	1
	0	Sevic, S. et al. (2016)	0	1	1	0	0	0	0	0	0	0	0	0	1	2	1	3	2
	0	Todosijevic, J. et al. (2005)	0	1	1	0	0	0	0	0	0	0	0	0	0	2	0	3, 5	1
	0	Trail, T. E. et al. (2012)	0	1	0	0	1	0	0	0	0	0	0	0	0	2	0	2	2
	0	Usdansky, M. L. et al. (2009)	0	0	0	0	1	0	0	1	1	0	1	1	0	2	0	5	2
	1	Alves, S. et al. (2018)	0	1	0	0	0	0	0	0	0	0	0	1	1	2	1	4	2
	1	Badr, H. (2004)	0	1	0	1	0	0	0	0	0	0	0	0	0	2	0	4, 5	1
	1	Badr, H., & Acitelli, L. K. (2005)	0	1	0	1	0	0	0	0	0	0	0	0	0	2	0	5	1
	1	Bae, D., & Kogan, S. M. (2020)	1	1	0	0	1	0	0	0	1	1	0	0	0	2	3	4, 5	2
	1	BeLue, R. et al. (2008)	0	1	0	0	1	0	0	0	1	1	0	0	2	2	0	5	2
	1	Brown, M. et al. (2020)	0	1	0	1	0	0	0	0	0	0	0	1	0	2	0	1, 4	1
	1	Dickson, M. (2020)	0	0	0	0	1	0	0	1	0	1	0	1	2	2	2	5	2
	1	Edwards, M. R. (2006)	0	0	0	0	0	0	0	1	0	0	0	1	0	1	0	4, 5	2
	1	Falconier, M. K. et al. (2013)	0	1	0	0	1	0	0	0	0	0	0	0	0	2	0	4	1
	1	Fallahchai, R. et al. (2019)	0	1	0	0	0	0	0	1	0	1	0	0	2	2	0	4	2
	1	Feinstein, B. A. et al. (2018)	0	1	1	0	0	0	0	0	0	0	0	0	0	2	0	3, 4	1
	1	Gao, L. et al. (2020)	0	1	0	1	1	0	0	0	0	1	0	0	2	1	2	5	2
	1	Goldberg et al. (2010)	0	1	1	0	0	0	0	0	0	0	0	1	0	2	0	1, 5	2
	1	Helgeson et al. (2020)	0	1	0	1	1	0	0	0	0	0	0	0	0	2	0	4	2
	1	Jovanovic, A., & Wallace, J. E. (2013)	0	1	0	0	0	0	0	1	0	0	0	1	0	1	0	4	1
	1	Kuenzler, A et al. (2011)	0	1	0	1	0	0	0	0	0	0	0	0	1	2	3	4	2
	1	Kulik, L., & Rayyan, F. (2006)	0	0	0	0	1	1	0	0	0	1	0	0	2	2	2	4, 5	2
	1	Meuwly, N et al. (2013)	0	0	1	0	0	0	0	0	0	1	0	0	1	2	3	4	1
	1	Mitchell, A. M. et al. (2015)	0	0	0	0	1	0	0	1	1	0	0	0	0	1	0	1, 4	1
	1	Molgora, S. et al. (2019)	0	0	0	0	0	0	0	0	0	1	0	1	1	1	1	4	1
	1	Monin, J. K., et al. (2019)	0	1	0	1	0	0	0	0	0	0	0	0	0	1	0	4	1
	1	Park, W., & Kim, J. (2018)	1	0	0	0	0	0	0	0	1	0	0	0	0	1	3	1	2
	1	Perlowski et al. (2021)	0	0	0	1	0	0	0	1	0	0	0	1	0	2	0	5	1
	1	Pinquart, M., & Fabel, K. (2009)	1	0	0	0	0	0	0	0	1	1	0	0	1	2	1	5	1
	1	Purdom et al. (2006)	0	0	0	0	0	0	0	1	0	0	0	1	0	1	0	4	2
	1	Reiter, M. J., & Gee, C. B. (2008)	1	0	0	0	1	1	0	0	0	0	0	0	0	2	0	4, 5	1
	1	Thomeer, M. B., & Kirsten, O. C. (2021)	1	1	0	0	0	0	0	0	0	0	0	0	0	1	0	4, 5	1
	1	Uysal et al. (2020)	0	1	0	0	1	0	0	1	0	1	0	0	1	1	2	4, 5	1
																4

## Sheet: Sample Demographics
NOTE	TOPIC	AUTHOR(S) /YEAR	INCLUSION CRITERIA	SAMPLE SIZE	GEOGRAPHICAL LOCATION	AGE	SEX/GENDER	SEXUAL ORIENTATION	ABILITY STATUS	RACE/ETHNICITY	RELIGION	EDUCATION	OCCUPATION	INCOME	RELATIONSHIP STATUS	PARENTAL STATUS
	(0 = stress; 1 = stress, support, coping)		NR = not reported		0 = U.S.; 1 = English-speaking country; 2 = Europe; 3 = Asia; 4 = Latin America; 5 = Middle East; 6 = Africa; 7 = multiple regions	1 = adult, 18 - 35; 2 = middle adult, 36 - 64; 3 = late adult, 65+	1 = sex; 2 = gender identity (participants asked to identify gender), 3 = unclear whether sex or gender identity were measured	0 = individual sexual orientation not reported; 1a = heterosexual; 1b = gay/lesbian, 1c = nonmonosexual, 1d = other sexual orientations		% racial demographics		% High School (or equivalent); % College; % Graduate degree			1 = committed, not married; 2 = married; 3 = widowed/divorced; 4= separated	0 = not parents; 1 = parents
y	0	Barton, A. W., & Bryant, C. M. (2016)	Individuals had to be 18 years or older, married, and sharing a residence with their spouse.	N = 468 married individuals	0	1, 2, 3	3	0	-	74% self-identified as White, 22% as Black/African American, 3% multiracial, 2% Latino/a, and 1% Asian American	-	Median education reported as completing a bachelor's degree	-	20% reported < $50,000, 40% had household incomes between $50,000 and $90,000, and 41% had household incomes > $90,000	2	0,1
y	0	Blom, N. et al. (2020)	Cohabitating (married or unmarried), of working age (25+), employed, unemployed, or homemaker, and have valid score on relationship satisfaction measure (dependent variable).	N = 11,536 (n = 5,779 male; n =5,757 female)	2	1, 2	3	0	-	-	-	Men and women, average completed higher secondary education.	Women, ~19% homemakers	-	1,2	0,1
y	0	Blumenstock, S. M., & Papp, L. M. (2017)	Both partners had to agree to participate, be of the same race, have no prior marriages, and reside within Wayne County, and the wife had to be younger than 36 years of age.	N = 373 couples (n = 199 African American; n = 174 European American)	0	1	3	0	-	Y1: Husbands, n = 199 African American, n = 174 European American; Wives, n = 199 African American, n = 174 European American	-	Highest grade completes (range 8 - 17 years). *Combined with income to create SES variable.	-	Ranged from <$2,999 to >$75,000. *Combined with income to create SES variable	2	-
y	0	Bodenmann, G. et al. (2007)	Divorced individuals with at least one child.	N = 622 (n = 282 German subjects, n = 141 Italian subjects, n = 239 Swiss subjects)	2	1, 2	3	0	-	-	German: Females (36.4% Protestant, 22.7% Catholic, 40.9% None/other), Males (26.8% Protestant, 24.4% Catholic, 48.8% None/other); Italian: Females (0% Protestant, 94.7% Catholic, 3.7% None/other), Males (0% Protestant, 96.3% Catholic, 3.7% None/other); Swiss: Females (39.7% Protestant, 30.8% Catholic, 29.5% None/other), Males (64.1% Protestant, 17.9% Catholic, 17.9% None/other)	German: Females (15.6% grade school, 39.7% high school, 13.6% college, 31.2% university), Males (11.9% grade school, 42.9% high school, 2.4% college, 42.9% university); Italian: Females (25.3% grade school, 17.7% high school, 45.6% college, 11.4% university), Males (20.0% grade school, 10.9% high school, 49.1% college, 20.0% university); Swiss: Females (30.4% grade school, 36.7% high school, 25.3…	-	German: Females (18.4% low, 72.6% medium, 9.0% high), Males (21.4% low, 57.1% medium, 21.4% high); Italian: Females (36.7% low, 51.9% medium, 11.4% high), Males (21.6% low, 37.3% medium, 41.2% high); Swiss: Females (22.1% low, 45.5% medium, 32.5% high), Males (20,1% low, 67.4% medium, 12.5% high)	3	1
	0	Cutrona, C. et al. (2003)	Participants were drawn from families who participated in the Family and Community Health Study; eligibility criteria included being an adult, primary caregiver of a child 10 - 12 years of age.	N =202 couples	0	1,2,3	1	0	-	African America (100%)	-	Women: 10% did not complete high school, 32% were high school graduates, 41% had completed one or more years of college, 10% held a four-year college degree, and 7% held an advanced graduate degree; Men: 14% had not completed high school, 36% were high school graduates, 29% had completed one or more years of college, 13% held a four-year college degree, and 8% held an advanced graduate degree.	Women: 80% employed; Men: 87% employed	Mean yearly gross family income in 1997 dollars was $47,530 (SD = $27,401) and ranged from $5000 to $201,000. The 25th percentile for income was $29,000 and the 75th percentile was $60,000	2	1
	0	Donnelly, R. et al. (2018)	NR; both partners had to participate	N = 378 couples (n = 106 male same-sex couples; n = 157 female same-sex couples, and n = 115 different-sex couples)	0	1,2	1	0	-	-	-	19.5% some college or less, 29.7% college degree, 50.1% postgraduate	-	-	2	1,0
	0	Doyle, D. M., & Molix, L. (2014)	NR; racial minority and being married	N = 630 ( n = 274 women)	0	2	1	1b	-	Puerto Rican (35.9%), Mexican (27.9%), Dominican (19.4%), and African American (16.8%)	-	-	-	-	1,2	-
	0	Drabe, N. et al. (2013)	Exclusion criteria: insufficient German language skills and disease-related and/or treatment-related weakness that resulted in their inability to complete the questionnaire.	N = 209	2	1,2,3	3	0	-	-	-	~48% completed an apprenticeship	-	Swiss Franc; ~39% 6000 - 9999/month	1	0,1
same sample	0	Falconier, M., & Epstein, N. (2010)	Clinical sample of couples who were at least 18 years of age, were a couple for at least one year, and were married or cohabiting.	N = 144 couples	4	1, 2	2	3	-	100% Argentinian White	Men: 75.5% Roman Catholic; Women: 81.3% Roman Catholic	Men: 37.9% some post high school; Women: 62.1% some post high school education	Men: 74.3% worked full-time, 13.9% worked part-time. Women: 37% homemakers, 29% worked full-time, 25% worked part-time	50.7% of women and 72.2% of men reported a monthly personal gross income between 500 Argentinean pesos (US$125) and 1999 Argentinean pesos (US$400)	1, 2	0,1
same sample	0	Falconier, M., & Epstein, N. (2011)	Clinical sample of couples who were at least 18 years of age, were a couple for at least one year, and were married or cohabiting.	N = 144 couples	4	1, 2	1	0	-	100% Argentinian White	Men: 75.5% Roman Catholic; Women: 81.3% Roman Catholic	Men: 37.9% some post high school; Women: 62.1% some post high school education	Men: 74.3% worked full-time, 13.9% worked part-time. Women: 37% homemakers, 29% worked full-time, 25% worked part-time	50.7% of women and 72.2% of men reported a monthly personal gross income between 500 Argentinean pesos (US$125) and 1999 Argentinean pesos (US$400)	1, 2	0,1
	0	Gonçalves, J. A. R. et al. (2019)	Identify as a man, have a minority sexual orientation/identity (gay, bisexual, pansexual), be in a committed relationship, be sexually active, and at least 60 years old.	N = 110 self-identified gay (81.8%) and bisexual/pansexual (18.2%) cisgender men	2	3	2	1b,1c	-	-	-	12.7% less than high school diploma; 34.5% high school diploma; 27.3% undergraduate degree, 25.5% graduate/post-graduate degree	54.5% employed	-	0, 1, 2, 3	0,1
	0	Helms, H. et al. (2014)	Data were collected as part of a larger project on the study of conceptual stress and Marriage among Mexican-origin families in child-rearing years.	N = 120 couples	0	1	3	0	-	100% Mexican-origin	-	-	Husbands: 98% employed; Wives: 54% employed	Average family income = $33,217	1, 2	0,1
	0	Jibeen, T. (2019)	Pakistani immigrants, living in Greater Toronto, between 25 and 50 years of age.	N = 115 (61% women; 39% men)	1	1, 2	2	0	-	NR; Pakistani	-	19% reported having a college-level education, 37% reported graduate-level education, 30% reported having a master’s level degree, and 13%reported having a professional education	7% participants were physical laborers, 17% worked in the human service sector, 40% were employed in professional or management fields, and 35%of the total participants identified themselves as housewives	9% of the participants reported a high level of income comfort, 65% reported a moderate level, and 26% reported a low level of income comfort	-	1
	0	Johnson, M. D. et al., 2019	Data were collected from the pairfam study.	N = 3,396 (n = 2,748 native born; n = 648 immigrant)	2	1	3	0	-	-	-	Native born: Male, M = 4.67 ; Females, M = 4.93. Immigrant: Male, M = 4.32 ; Females, M = 4.52 (range 1 - 7)	-	Native born, 2840; Immigrant 2366 Euros/month	2	0,1
	0	Kelly, S., & Floyd, F. J. (2006)	African American married couples.	N = 93 couples	0	1, 2, 3	3	0	-	100% African American	Protestant Protestant (57%; primarily Baptist), 25% were of other Christian sects, 11% were of various other faiths, and 8% did not report a religious affiliation	Husbands: M = 16.20; Wives: M = 16.03 (16 = bachelor's degree)	On average, participants had an occupational prestige ranking similar to that of a manager or technician	Husbands: M = 52.67 (thousands); Wives: M = 39.66 (thousands)	2	0,1
	0	Kerr, J. et al. (2018)	Data were collected from the Eunice Kennedy Shriver National Institute of Child Health and Human Development’s (NICHD) longitudinal Child Community Health Network study.	N = 203 fathers	0	1	3	0	-	100% African American	-	19.21% < high school, 37.93% high school, 42.86% > high school	-	27.90 at Federal (U.S.) poverty level (FPL), 21.67% > 100 - 200% FPL, 51.23% > 200% FPL	0, 1, 2	0,1
	0	Khawaja, N. G., & Milner, K. (2012)	South Sudanese community, who were currently or had recently been in relationship.	N = 13 (n = 4 men, n = 9 women).	1	1, 2	3	0	-	All members of Dinka tribe	-	Women: 6 received primary school education, 2 completed high school, 1 received professional qualification; Men: 2 completed high school, 2 obtained university degrees	Women: 2 employed, 7 supported by governmental funds; Men: unemployed and supported by governmental funds	Ranged from no official schooling to university degrees obtained in Sudan	1, 2, 3	-
	0	Kinnunen, U., & Feldt, T. (2004)	Data were collected as part of the ‘Economic Crisis, Job Insecurity and the Household’ project in which the main target was to examine the effects of the economic recession on individuals’ lives in Finland.	N = 608	2	1, 2	3	0	-	-	-	Husbands: 26% none, 34% vocational school, 23% vocational college, 17% higher. Wives: 23% none, 25% vocational school, 35% vocational college, 17% higher	Husbands: 83% employed, 9% retired, 6% unemployed, 2% studying/doing something else. Wives: 76% employed, 3% retired, 8% unemployed, 8% studying/doing something else	Husbands: 37% blue-collar, 23% low white-collar, 25% higher white-collar, 15% entrepreneurs. Wives: 28% blue-collar, 46% low white-collar, 19% higher white-collar, 7% entrepreneurs	1, 2	0,1
	0	Kwon, H. et al. (2003)	Data were from the National Survey of American Life (NSAL), a national cross-sectional study of African Americans and Caribbean Blacks	N = 962	0	1, 2	3	0	-	100% African American	-	18.9% less than 12 years, 35.8% 12 years, 26.1% 13 - 15 years, 19.3% 16 or more years	-	9.4% reported being poor, 20.7% reported near poor, 69.9% non poor	2	0,1
	0	Lee, S. et al. (2020)	Data were collected from the Iowa Youth and Family Project (IYFP) between 1989 and 1994 and continued to participate in the Iowa Midlife Transitions Project (MTP) in 2001 and the Later Adulthood Study (LAS) in 2015. The families meeting the selection criteria (i.e., couples living together with at least one target child in the seven grade and a sibling within 4 years of age of the target child, i…	N = 370 married couples	0	1, 2	1	0	-	100% White	-	Median education for husbands and wives = 13 years	-	-	2	-
	0	Lincoln, K. D., & Chae, D. H. (2010)	Data were from the National Survey of American Life (NSAL), a national cross-sectional study of African Americans and Caribbean Blacks	N = 962	0	1, 2	3	0	-	100% African American	-	18.9% less than 12 years, 35.8% 12 years, 26.1% 13 - 15 years, 19.3% 16 or more years	-	9.4% reported being poor, 20.7% reported near poor, 69.9% non poor	2	0,1
	0	Lu, A. et al. (2019)	At least 21 years old, perceive themselves as a couple, in a sexual relationship at some point in their shared history, and could participate in English.	N = 24 couples	0	1, 2, 3	3	1c,1b	-	50% White/White, 21% Black/Black, 4.2% Asian/Latino, and 8.3% for each White/Latino, White/Black, and White/Asian. *Reported at the couple level	-	-	-	-	-	-
	0	Puckett, J. A. et al. (2017)	NR; LGB women.	N = 1,017 LGB [lesbian, gay, bisexual] women	0	1, 2, 3	2	1b,1c,1d	-	White (84.4%), Latina (3.4%), biracial/multiracial (3.4%), Asian/Pacific Islander (2%), Native American (0.7%), and participants who identified as ‘‘other’’ (2.2%)	-	4% reported having a high school diploma or less, 30.2% had some college education, 31.3% had a college degree, and 34.4% had a master’s degree or higher	-	-	-	-
	0	Remien, R. H. et al. (2003)	Couples needed to: (a) consider themselves to be in a ‘mutually committed relationship’ (self-defined), (b) perceive each other as primary partner, and (c) have been sexually active with each other during the past year. Minimum age for participation was 18, and minimum required length of relationship was four months.	N = 75 couples	0	1, 2	3	0	-	21% Latino, 16% African American, 1% Native American	-	M = 15 years	2/3 sample was employed	13% received diversity benefits	1	-
	0	Sevic, S. et al. (2016)	NR; partnered, heterosexual men.	N = 860 partnered heterosexual men	1, 2	2	3	1a,1b,1c	-	-	Heterosexual men (n = 860): .8% primary, 40.3% secondary, 58.6% tertiary; Gay/bisexual men (n = 250), .8% primary, 36% secondary, 63.2% tertiary	-	-	2	-	-
	0	Todosijevic, J. et al. (2005)	Lesbian and gay male couples who had had civil unions in Vermont during the first year this legislation was available (July 1, 2000 to June 30, 2001).	N = 313 couples (n = 114 gay male; n = 199 lesbian)	0	2	1	1b	-	Gay male couples, 78.1% both White, 16.7% one African American, Latina, Asian American, and Native American, one white, 3.5% one White, one "other; Lesbian couples, 91.1% both White, 5.6% one African American, Latina, Asian American, and Native American, one white, 7.7% one White, one "other"	-	Gay male couples, M = 15.5, Lesbian couples, M = 15.8	-	Gay male couples, M = $60, 795, Lesbian couples, M = $47, 939	1	-
	0	Trail, T. E. et al. (2012)	Recently married couples from Los Angeles County, United States.	N = 330 couples	0	1	3	0	-	100% Latino; 70% Mexican descent	-	-	-	Wives, M = $22,026 (SD = $21,432); Husbands, M = $29,409	2	0, 1
	0	Usdansky, M. L. et al. (2009)	Data were from the Fragile Families and Child Wellbeing Study.	N = 2,679 unmarried couples	0	1	3	0	-	Nonveteran fathers: 1,388 Black, 284 White, 721 Hispanic; Veteran fathers: 156 Black, 43 White, 80 Hispanic	-	9% both parents had some education, 11% father only had some college, 14% mother only had some college, 66%neither parent had some college	-	Nonveteran fathers: 48% Black, 40% White, 37% Hispanic reported mothers received welfare; Veteran fathers: 48% Black, 25% White, 40% Hispanic reported mothers received welfare	1	1
	1	Alves, S. et al. (2018)	Women in the second trimester of a singleton pregnancy, both partners in a relationship (formally), at least 18 years of age, and both partners able to read/understand Portuguese.	N = 289 heterosexual couples (n = 57 couples wherein the woman reported high symptoms of depression)	2	1	3	0	-	NR; Portuguese	-	Women: University: 61.9%, High-school: 33.3%, Middle-School: 4.8% Men: University: 44.1%, High-school: 33.2%, Middle-School: 22.7%	Women: Employed: 84.7%, Unemployed: 15.3% Women: Employed: 94.3%, Unemployed: 5.7%	-	1,2	0,1
same sample	1	Badr, H. (2004)	NR; couples were ineligible if one of both spouses had cognitive impairment or a mental illness.	N = 182 couples (n = 92 couples wherein one partner had a chronic illness)	0	2	2	1	n = 92 couples, one spouse had a chronic illness	49% Caucasian, 17% Asian,16% African-American, 15% Hispanic, 2%other, and less than 1% not responding	-	More than 50% had at least some college education	-	65% reporting household incomes greater than $50,000 per year	2	-
same sample	1	Badr, H., & Acitelli, L. K. (2005)	NR	N = 182 couples (n = 92 couples wherein one partner had a chronic illness)	0	2	3	0	Chronic illness	Caucasian (49%), Asian(17%), African American (16%), Hispanic (15%), other (2%), and less than 1% not responding	-	64% reported some college education	-	65% reported household incomes over $50,000	2	-
	1	Bae, D., & Kogan, S. M. (2020)	Data were collected as part of the African American Men's Project (AMP).	N =505 men	0	1	3	0	-	African American (100%)	-	-	-	-	1	-
	1	BeLue, R. et al. (2008)	NR; convenience sample from Empilisweni Clinic during their well-baby visit 6 to 8 weeks after delivery.	N =81 mothers	6	1	3	0	-	African (100%)	-	100% had less than 10 years of education	95% unemployed	-	4	1
	1	Brown, M. et al. (2020)	Married, heterosexual, and have a child with ASD (autism spectrum disorder).	N =69 heterosexual married couples	0	1,2	3	0	Child with ASD	Caucasian (husbands=73.9%, wives=78.3%)	-	Bachelor’s degree (Husbands = 68.1%, Wives = 81.2%)	-	Annual household incomes of $75,000 or more (Husbands = 44.9%, Wives = 44.9%)	2	1
	1	Dickson, M. (2020)	Academic women living and working in the United Arab Emirates, employed full-time at the rank of either Assistant or Associate Professor, and had at least child under the age of eighteen living full-time at home with them.	N = 9	5	-	3	0	-	-	-	-	Assistant or Associate Professor	-	-	1
	1	Edwards, M. R. (2006)	Convenience sample of mothers who were engaged in full-time employment outside of the home, had at least one child, aged infant to 13 years, living in their home.	N =121 mothers	0	1,2	3	0	-	Caucasian (84.3%), African-American (5.8%), Asian-Americans (5.8%), Native-Americans (2.5%),and Hispanic-American (.8%)	-	100% high-school graduate or more	-	Family income ranged between $60,000 and $70,000	2	1
	1	Falconier, M. K. et al. (2013)	Self-identification as Latino/a, at least 18 years of age, and lived with current partner for at least one year.	N =107 couples	0	1,2	3	0	-	Latino (100%)	-	Men: 27.9% did not complete high school, and 21.2% graduated at least from college; Women: 30.7% did not complete high school and 24% graduated at least from college.	84.6% men and 61.5% women were employed	Household income was over $50,000 for 47.1% of couples, between $20,000 and $49,999 for 31.7%, and below $19,999 for 14.4% of couples	1,2	1,0
	1	Fallahchai, R. et al. (2019)	Married for at least 2 years, both of the partners had to have been working at least 2 years, and have full-time employment status.	N = 206 heterosexual couples	3	1,2	3	0	-	-	-	62.6% of participants had B.A. degrees, 26.2% had M.A. and Ph.D. degrees, and 11.2% had high school diplomas	-	-	2	0,1
	1	Feinstein, B. A. et al. (2018)	Data were from an ongoing longitudinal cohort study of multilevel influences on HIV and substance use among young MSM. Cohort members were required to meet the following criteria: 16–29 years old, assigned male at birth, English-speaking, and identified as gay/bisexual or had sex with a man in the past year.	N =153 couples	0	1,2	3	1b,1c,1d	HIV+	35.0% Black/African American, 29.1% White, 28.1% Hispanic/Latino, and 7.8% other	-	12.1% had not completed high school, 72.5% completed high school, 12.4% completed college, and 2.9% completed graduate school	-	-	-	-
	1	Gao, L. et al. (2020)	Wife was diagnosed with primary breast cancer (stages I–IV); partners were aged 18 years or older, fluent in Mandarin; and both rated the highest level of satisfaction (rank of 5) with the level of support provided by the spouse using the Satisfaction with Spousal Support Scale.	N =22 male spouses	3	2,3	3	0	Spouses of breast cancer patients	-	-	59% College educated	50% employed, 32% retired, 18% on leave	-	2	-
	1	Goldberg et al. (2010)	Couples had to be adopting their first child and both partners had to be first-time parents.	N =125 couples (44 lesbian, 30 gay, and 51 heterosexual)	0	2	1	1a,1b,1c	-	-	-	-	-	Lesbian couples, M = $104,747; gay couples, M = $179,843; heterosexual couples, M = $123,947	-	0
	1	Helgeson et al. (2020)	Couples in which one person had been recently diagnosed with type 2 diabetes; To be eligible, patients had to have been diagnosed with type 2 diabetes within the past 5 years, not have another illness that affected their daily life more than diabetes (e.g., cancer), have a partner who did not have diabetes, and be married or cohabiting with their partner in a marital-type relationship for at leas…	N=200 couples	0	2	3	0	Diabetes patients, their spouses	Patients included 42 Black women (21%), 51 Black men (26%), 47 White women (23%), and 60 White men (30%). The majority (95%) of both participants and spouses were of the same race.	-	35% had a 4-year degree	-	Median range = $40–$59,000	1,2	0, 1
	1	Jovanovic, A., & Wallace, J. E. (2013)	NR	N =31 married physicians and their spouses (n = 12 women; n = 19 men)	0	2	3	0	-	-	-	-	Physicians	-	2	0,1
	1	Kuenzler, A et al. (2011)	Adult patients with a new primary cancer of any type and stage were approached within 8 weeks of diagnosis.	N = 137 couples	0	2,3	3	0	Cancer patients, their spouses	-	-	-	-	-	2	-
	1	Kulik, L., & Rayyan, F. (2006)	Married women, mothers of children, where both spouses are working outside the home. In addition, the Arab-Muslim women had to be Hebrew speakers as the questionnaires were administered in Hebrew.	N =146 participants (n = 59 Jewish women; n = 87 Arab-Muslim women)	3	1,2	3	0	-	-	Arab, Jewish	Jewish women: 11.5% (7) had a high school education; 27.0% (15) had a post-high school education without a degree; and61.5% (37) held university degrees. Among the Arab-Muslim women, the figures were 20.0% (18), 38.4% (34) and 41.6% (35), respectively	Employed	-	2	-
	1	Meuwly, N et al. (2013)	Currently in a romantic relationship.	N = 82 women (n = 35 in a romantic relationship with a female partner and considered themselves to be lesbian; n = 47 in a romantic relationship with a male partner and considered themselves to be heterosexual)	0	1,2	3	1a,1b,1c	-	-	-	-	-	-	1,2	0,1
	1	Mitchell, A. M. et al. (2015)	Recruitment focused on couples who were expecting or had recently had a child.	N = 299 couples in heterosexual relationships	0	NR	3	0	-	75.3% African American, 12% Latino/Latina, 12%Latino/Latina, Hispanic, and 0.5% Caucasian	-	-	-	45–71% of these individuals earns less than $38,622	-	0,1
	1	Molgora, S. et al. (2019)	In a stable couple relationship; having a spontaneous and planned pregnancy; being fluent in Italian; and absence of serious complications (for the mother-to-be and the foetus).	N = 78 couples	2	1,2	3	0	-	NR, Italian	-	Women: 2.6% had middle-school diploma, 44.2% had high-school degree and 53.2% had College degree or were graduates; Men: 9.2% had middle-school diploma, 64.5% had high-school degree and 26.3% had College degree or were graduates	Women: 88.2% had White collar jobs, 7.4 had Blue collar job and 4.4% were Self-employed. Men: 51.3% had White collar jobs, 25.0 had Blue collar job and 23.7% were Self-employed.	-	-	1
	1	Monin, J. K., et al. (2019)	Age 50 years or older, in a heterosexual relationship, lived together for at least 6 months and neither partner was taking beta blockers.	N = 98 married couples	0	1,2	3	0	Health concerns present	More than 90% of husbands, wives were Caucasian.	-	86% of women had some college education or higher. 88% of men had some college education or higher.	Women: 50% were retired, 14% employed full-time, 20% employed part-time, 8% were homemakers, 6% were unemployed, and 1% were self-employed; Men: 55% were retired, 15% were employed full-time, 24% were employed part time, and 5% men were unemployed.	Household income: <$10,000 3% $10,000 - $39,999 16% $40,000–$69,999 27% $70,000–$99,999 21% $100,000 or more 29%	2	-
	1	Park, W., & Kim, J. (2018)	Data came from the Health and Retirement Study (HRS).	N = 4935 individuals	0	2,3	3	0	-	Males. Middle-age: White - 76.2%, African American - 14.9%, other - 9%; young-old: White - 88.7%, African American - 8.9%, other - 2.4%; Old-old: White - 91.8%, African American - 6.6%, other - 1.6%. Females. Middle-aged females: White - 75.3%, African American - 17%, other - 7.7%, young-old: White - 87.4%, African American - 10.5%, others - 2.1%, old-old females: White - 90.8%, African American …	-	Males. Middle-aged: 64.8% high school or lower, 35.2% some college or higher; young-old: 63.6% high school or lower, 36.4% some college or higher; young-old: 69.1% high school or lower, 30.9% some college or higher; old-old: 73% high school or lower, 27% some college or higher - 27.0%. Females. Middle-aged: 63.6% high school or lower, 36.4% some college or higher; young-old: 79.3% high school or …	Males. Middle-aged: employment - 63.9%, unemployment- 11.2%, retirement - 12.6%, homemaker - 0.2%, disabled and others - 12.2%; young-old: employment - 24.6%, unemployment- 2.0%, retirement - 69.4%, homemaker - 0.5%, disabled and others - 3.6%; old-old: employment - 7.9%%, unemployment- 0.9%%, retirement - 87.5%, homemaker - 0.3%, disabled and others - 3.4%. Females. middle-aged females: Employme…	Males. Middle-aged: M = 96,620; young-old: M = 78,936; old-old: M = 54,751. Females. Middle-aged: M = 91,369; young-old: M = 65,909; old-old: M = 54,848	-	-
	1	Perlowski et al. (2021)	Married participants, at least 18 years of age, and had a child with a special needs diagnosis.	N = 102 (n = 96 females)	0	1,2	1	0	Child with special needs.	95% White, 4% African American, 1 % Asian America. 91% not Latino, 9% Latino	-	Less than 12th Grade - 2.9%, High School Diploma 3.9%, Some college/university or technical school, no degree 19.6%, Associate’s degree 10.8%, Bachelor’s degree 40.2%, Master’s degree 16.7%, Professional degree beyond a Bachelor’s degree/Doctorate - 5.9%	-	$20,000–$40,000 - 13.1%, $40,000–$60,000 - 13.1%, $60,000–$80,000 - 24.2%, $80,000–$100,000 - 14.1%, $100,000–$150,000 - 25.3%, Over $150,000 - 10.1%	2	1
	1	Pinquart, M., & Fabel, K. (2009)	Age 16 to 42 years.	N = 2,523	2	1,2	2	1	-	NR, German	-	-	-	-	-	-
	1	Purdom et al. (2006)	Married or living together under common law.	N = 143 dual-income couples; N = 59 single-income couples.	0	2,3	3	0	-	Caucasian - 83.9%, African American - 11.3%, Hispanic - 2.1%, American Indian - 0.8%, Asian - 0.8%, other - 1.1%	-	-	-	Above $100,000 - 60.10%, $60,000 - $99,999 - 31%, under $60,000 -- 27.60%	2	0,1
	1	Reiter, M. J., & Gee, C. B. (2008)	In a romantic relationship for at least one month.	N = 353 (n = 251 females, n = 90 males, n = 12 not reported)	0	1	3	0	-	-	Inter -faith	Undergraduate students	-	-	-	-
	1	Thomeer, M. B., & Kirsten, O. C. (2021)	Married for more than one year, both spouses needed to be 65 years or older and currently experiencing at least one activities of daily living (ADL), instrumental activities activity of daily living (IADL), or mobility difficulty, or have a chronic illness.	N = 23 couples	0	3	3	0	Chronic illness	95.5% couples were White - White, 4.5% couples were Black - Black	-	11.3% graduated high school, 88.7% had some college or higher	-	-	2	1,0
	1	Uysal et al. (2020)	NR; employed mothers.	N = 201 employed mothers	3	1,2	3	0	-	NR, Turkish	-	67% university degree, 18% post education degree, 14% high school degree	100% employed	-	2	1

## Sheet: Details
	KEY:	Stress literature review
		Support literature review
		Coping literature review
ARTICLE #	AGE/COHORT	GENDER	SEXUAL ORIENTATION	ABILITY STATUS	RACE/ETHNICITY	RELIGION	EDUCATION	OCCUPATION	SES	GEOGRAPHICAL LOCATION	RELATIONSHIP STATUS	PARENTAL STATUS
1	Husbands’ mean age was 36.5 years (SD55.9), and wives’ mean age was 34.2 years (SD56.1).	male, female	heterosexual		sample was ethnically diverse, with partnersrepresenting a combination of European Ameri-can, African American, Asian American, andMexican American backgrounds.			Twelve officers were patrol officers, and seven officers held deskjobs (e.g., investigative work). Thirteen officersworked day shifts, and six officers worked nightshifts. Officers had belonged to the police force amean of 9.4 years (SD55.2). Seven of the wivesin our sample held full-time employment outsidethe home, seven were full-time homemakers orstudents, and five were self-employed or heldpa…	The mean gross income of participating couples was approximate-ly $75,000 per year (SD5$18,500).	Fourteen of the officers in our sample werefrom the Oakland, California, Police Department.Of the remaining officers, two were from the Cityof Berkeley Police Department, two were from theUniversity of California—Berkeley Campus Po-lice Department, and one was from the Alameda,California, Police Department	Couples had been married an average of 7.9years (SD57.6). In 11 couples, both partnerswere in their first marriage, and in eight couplesone or both partners had been married and di-vorced previously (six husbands and three wives).	Fourteencouples had one or more children, and five did not have any children.
2	Adult, 18 & older	male, female	Heterosexual	Not mentioned	Chinese, US(predominantly Caucasian)	Some had religious affiliation, some did not.	Not mentioned	Not mentioned	Not mentioned	China, USA	Married	Not mentioned
3	The mean age of the husbands was 43.55, mean age of the wives was 40.28 years.	male, female	heterosexual				Men - mean education level was 13.75 grades, women - mean education level was 13.34 grades	In the husbands' sample, 6 per cent had top-management jobs, whereas among the wives in the sample only 1.1 per cent held such jobs. Middle management jobs were held by 19.3 per cent of the husbands and 6.7 per cent of the wives. In the professional jobs we found 32.5 per cent of the husbands and 45 per cent of the wives. In the non-professional jobs were 42.2 per cent of the husbands and 47.2 pe…		Israel	married	mean number of children was 2.66
4	Not mentioned	Not mentioned	Not mentioned	Not mentioned	Not mentioned	Not mentioned	Not mentioned	Not mentioned	Not mentioned	South Carolina	Married, Divorced	Not mentioned
5	av- erage age was 36.2 years for male partners, 34.3 for female partners.	male, female	heterosexual		12% of respon- dents were Black and 6.6% were Hispanic		Men averaged 13.4 years of education, women 13.2.	Sixty-four percent of women were employed at the time of the Wave 1 interview, as were 90% of the men.	the average household income was 445% of the poverty line for similarly sized households.
6	Adult, 18 & older. Mean ages of patients and spouses were 53.4 years (SD_x0001_10.1,range_x0001_29–78) and 52.0 years (SD_x0001_10.8,range_x0001_29–75), respectively. Male and female patients were comparable in age, the spouses of female patients tended to be older (M_x0001_55.9,SD_x0001_12.0) than the spouses of male patients(M_x0001_50.4,SD_x0001_10.0). Couples had been married an average of 25…	132 Male, 49 female	Heterosexual	Patients had a left ventricular ejection fraction (LVEF), assessedthrough radionuclide ventriculography, lower than 35%	83% White and 11% African-American.	Not mentioned	Most of the patients (75%) had atleast a high-school education and nearly half (46%) had attended college.	Not mentioned	Median reported household income was approximately $35,000, with roughly 28% under $20,000 and 29% over $50,000	US	Married	Not mentioned
7	Teenage mothers and older first-time mothers (_x0002_35 years) were excluded. only moth-ers who worked full-time (more than 35 hr per week) were included. mothers’meanage was 26.6 years (SD_x0001_3.9 years, range_x0001_19–35 years), andfathers’mean age was 28.7 years (SD_x0001_5.2 years, range_x0001_19–41years).	Male, female	Heterosexual	Not mentioned	Eighty of the families were Caucasian and 3 were AfricanAmerican, which is representative of the population in the area ofparticipant recruitment.	Not mentioned	The average number of years of education was 13.8 years(SD_x0001_2.1 years, range_x0001_8–18 years) for the mothers and 13.5years (SD_x0001_1.9 years, range_x0001_9–18 years) for the fathers.	Both mother, father employed.	Dual earner families	predominantly White, rural area of western North Carolina	Couples had been married an average of 45.6 months (SD_x0001_40.4months, range_x0001_4–204 months). The average length of marriagewas 40.1 months (SD_x0001_29.0 months, range_x0001_4–128 months)	Parents
8	The mean age for women in the sample was 37.5 (SD ¼ 7.6; range ¼ 21–73 years) and the mean age for men was 40.4 (SD ¼ 8.9; range ¼ 23–88 years).	male, female	heterosexual		African Amarican		10% of the women had not completed high school, 32% wer e high school graduates, 41% had completed one or more years of college, 10% held a four-year college degree, and 7% held an advanced graduate degree. Among the men, 14% had not completed high school, 36% were high school graduates, 29% had completed one or more years of college, 13% held a four-year college degree, and 8% held an advanced g…	Eighty percent of the women and 87% of the men were employed.	Mean yearly gross family income in 1997 dollars was $47,530 (SD ¼ $27,401) and ranged from $5000 to $201,000.	Iowa, Georgia	married. The mean number of years married was 12.5 and ranged from less than one year to 52 years.
9		male, female	heterosexual					dual acreer, single career		Australia
10	Female participants between the ages of 14 and 19, expecting their first child. Male participants were required to be between 14 and 24 years ofage.	Male, female	Heterosexual	Not mentioned	African American, Latino	Not mentioned	participants (66.9%) were enrolled in high school and most(81.9%) were living with their own parent(s).			United States	On average, couples had known each other for 27.6months (SD_x0001_21.5) prior to being interviewed.	Expecting 1st child
11	Husbands’ mean age was 42.8 years, andwives’ mean age was 39.9 years.	male, female	heteosexual		Koren		65% of the husbands and 47% of the wives hadat least some college education,	30% of wives worked outsideof the home, and 6% of husbands were unem-ployed	Middle class	Seoul, South Korea	Married, mean length of marriage was 16.2 years	Parent of teenage child
12
13	persons aged between 25 and 59 years. The average age of the men was44 years (SD¼10.1) and of the women 42 years (SD¼10.3). A great majority of the partners werebetween 35 and 54 years old.	male, female	heterosexual				Most had a vocational school or a collegeeducation.	Eighty-three per cent of the men and 76% of the women were employed and under 10%were unemployed.Of the employed, the men worked more often in blue-collar, upper white-collar or entrepreneurialoccupations than the women, who were more often employed as lower white-collar workers. The menwere more often employed in the private sector than the women, who more often worked in the publicsector. Over …		Finland	Seventy-seven per cent of them were married and 23% cohabiting. The marital or cohabita-tional relationship had on the average lasted 17 years (SD¼10.8).	Of the couples 41% had no children living at home, whereas 23% hadone child, 22% two and 14% three or more children.
14	Mean = 34.1, SD = 10.17	women	heterosexual		Mexican born vs US born		M = 8.73, SD = 3.92	Share of family income: M = 41%, SD = 41%		USA, include Mexican immigrants	married
15		male, female	heterosexual		African american	Protestant(57%; primarily Baptist), 25% were of other Christian sects, 11%were of various other faiths, and 8% did not report a religiousaffiliation.	On average, participantshad a college education	on average had an occupational prestige ranking similar to that of a manager ortechnicia			in a relationship for 20 or more yeras, married most of that time
16			heterosexual							Germany, Italy, and Switzerland	Separated or divorced
17	Husband age: Mean(SD)=46.3(14.3), Wife age: Mean(SD)=44.2(13.8)	male,female	heterosexual				Husband:Mean(SD)=13.1(3.1), Wife:Mean(SD)=13.0(2.7)		Combined family income:Mean(SD)=52,673.0(43,925.0)	Iowa	Married	No of dependent children: Mean(SD)=1.1(1.3)
18	Mage=35 years)	men	gay (71%)		African American	Baptist (40%)	Majority had 1 year of college or higher.	Administrator-32.8%, Clerical, retail, technical-33.9%, rest were diverse			single (63%)
19	Patients’ average age was 62.86 years (SD_x0002_10.14).	The majority were male (62.7%	heterosexual	lung-cancer	not Hispanic or Latino (95.3%);white (88.2%)		educated with some college level credits, a 2-yeardegree, or higher (61.5%);	retired (50.6%)			married (97.6%).
20		male, female	heterosexual						two groups of clinical couples: one with very lowreported incomes (<$10K/yr.), and one with a more middle class sam-ple (>$30K/yr.)		married
21	The mean agefor patients was 70.66 years (S.D. = 6.21) and 69.20 years(S.D. = 7.38) for spouses	231 cancer patients(141 men and 90 women) and their spouses.	heterosexual	Colorectal cancer			patients had a mean of 12.55 yearsfor education (S.D. = 3.51) and spouses a mean of 12.07 years(S.D. = 4.47)	56 (25%) patients and 64 (28%) spouses werestill working during the time of the study		Israel	Married
22	18 and 65 for the women(M= 39.4,SD= 11.2) and between 21 and 72 for the men (M= 41.9,SD= 12.8).	female, male	heterosexual		Latino		8% of the men completed college, 43% completed high school,and 18% completed elementary school, only. Similarly, 13% of the women completed college,44% completed high school, and 8% completed elementary school.	67.5% of the men reported currently being employed whereas only 27.5% of the womenwere currently employ	37.5% of both men and women reported earning <$10,000 a year
23		male, female	heterosexual		unmarried couples with Black, White, or Hispanic fathers					USA	unmarried at time of birth of child
24			heterosexual						middle class	Argentina	married or cohabitating
25	Men (Mage = 38.0,SD= 9.0), women (Mage = 35.9,SD= 8.6)		Heterosexual		All were White.	majority of women (81.3%) and men (75.5%)self-identified as Roman Catholic.	62.1% of women but only 37.9% ofmen had some post high school education	Women werehomemakers (37%), employed full-time (29%), or worked part-time (25%).Most men (74.3%) worked full-time and 13.9% worked part-time	Half of women (50.7%) and a majority of men (72.2%) reported a monthly personal gross income between 500 Argentinean pesos (US$125) and 1999 Argentinean pesos (US$400). Men’s mean monthly gross income was significantly higher than women’s. When combined, the majorityof couples were middle-class.	Buenos Aires, Argentina	Married or cohabitating for atleast a year. Most couples (n= 114, 80.4%) weremarried, the rest were cohabitating, and the total sample had been livingtogether for a mean of 10.3 years (SD= 7.5 years).
26	Mean age = 45.97 (0.6)	men, women	heterosexual		African American, Caribbean Black		Less than 12 years 195 (18.9%),12 years 350 (35.8%), 13-15 years 245 (26.1%), 16 or more years 172 (19.3%)	Working 206 (73.6%), Not working 52 (5.4%), Out of labor force 203 (21.0%)	About 30% were poor or near poor.	USA	Mean length of marriege = 15.87 (0.66), For 73% this was their first marriage.	A minority of 9.6% had no children, others had 1 or more children.
27			heterosexual			major-ity of women (81.3%) and men (75.5%)identified their religious affiliation as RomanCatholic.				Argentina	80.4% (n=114)of the couples were married, whereas 19.6%(n=28) were unmarried and the total sam-ple had been living together for a mean of10.3 years (SD=7.5 years).	81% had children
28			heterosexual			major-ity of women (81.3%) and men (75.5%)identified their religious affiliation as RomanCatholic.				Argentina	80.4% (n=114)of the couples were married, whereas 19.6%(n=28) were unmarried and the total sam-ple had been living together for a mean of10.3 years (SD=7.5 years).	81% had children
29	56 - 73		same - sex, 20 female - female, 16 male - male		Most of the couples consisted of two Caucasian individuals (N¼29), three consisted oftwo African-American individuals, and four consisted of two individuals with differingracial/ethnic backgrounds.					Massachusetts	Married
30	Par-ticipants ranged in age from 19 to 60 years (mean [M]=34, standard deviation [SD]=9)	Men	Gay		Chinese (42%), Filipino (20%), Vietnamese (12%), Taiwanese (7%), Japanese (5%), Hmong (3%), Indonesian (2%), Kazakh (2%), Indian(1%), Malaysian (1%), and Thai (1%).		Eighty percent of the participants in this studyheld a college or postgraduate degree
31	Theageofparticipantsrangedfrom22to44years(M=34.2).	13(4menand9women)	heterosexual		Sudanese (African)		ThelevelofeducationamongsttheparticipantsrangedfromnoofficialschoolingtouniversitydegreesobtainedinSudan.Twoofthemaleparticipantsreportedtheyhadcompletedhighschoolandtheothertwohadobtaineduniversitydegrees.Themajority(6)ofthefemaleparticipantshadreceivedaprimaryschooleducation,with2participantshavingcompletedhighschoolandonethenobtainingaprofessionalqualification.	Ofthewomenparticipantstwowereemployed,oneintheprofessionforwhichshewastrained;theother7reportedtheywerefundedbygovernmentbenefits.Allthemaleparticipantsreportedbeingunemployedanddependantongovernmentbenefitsatthetimethedatawascollected.T		Sudanese refugees in Australia	Eightparticipantswerelivingwiththeirspouses,whereas5wereseparated,divorcedorwidowed.
32	both husbands and wives were in theirearly middle years; the average ages of husbandsand wives were 40 and 38 years,	male, female	heterosexual		All white		the average number ofyears of education for husbands and wives were13.68 and 13.54.	96% of the husbands and 78% ofthe wives were employed.	Median yearly fam-ily income in 1989 was $33,240 (ranged from$0 to $259,000).	Iowa	On average, the couples had been married for17 years	On average, had three children from their mar-riage together. The median age of the youngestchild was 10.
33	Older, the averageparticipant was in his late 50s (range=44---75years)	men	gay		The majority were non-Hispanic Whit		Majority were college graduates	half were employedfull time
34	The average age of participants was 20.77(SD=1.88), with ages ranging from 18 to 25.	men (48.8 %),43.5 % as women, 4.6 % as genderqueer, 2.1 % as trans-man/woman, and 1 % as other.	72.1 % identifiedas gay or lesbian, 15.3 % as queer, 5.6 % as bisexual,4.6 % pansexual, and 2.4 % other (e.g., questioning,straight).		Themajority of participants identified as Caucasian (72.1 %),followed by Latino or Hispanic (8.7 %), multi-racial(7.9 %), African-American (5.6 %), Asian or PacificIslander (5.4 %), and American Indian or Alaska Native(0.3 %).		The majority of participants attended public colleges/universities (67.0 %), with 25.8 % attending private, non-religiously affiliated colleges, 6.4 % attending religiouslyaffiliated colleges, and 0.8 % attending professional/tradeschools.		Approximately 48, 28, and 24 % stated that theircombined family/parents’ annual income was less than$50,000, between $51,000 and $100,000, and greater than$100,000, respectively.	United States	Most participants described their current relationship as amonogamous dating relationship (80.4 %); an additional17.5 % reported that they were partnered in an open rela-tionship, and 2.1 % were married or in a domestic partnership/civil union. On average, participants had been involved in theircurrent relationship for about a year (M=12.73 months;SD=13.58 months; Range: 0–96 months).
35	Women in this studyranged in age from 18 to 24 with a mean age of 21.41(SD=1.79).	female	Sexual Minority - 55 % of women in this sample identified as lesbian,33 % as bisexual, and 13 % as some other identity (i.e.,queer, pansexual, no label, heterosexual).		70 % identifiedtheir race or ethnicity as White/European-American, 11 %identified as Black/African American, 6 % as Latino/His-panic, and 12 % identified as some other racial category.					Mich-igan n=224, National n=247, 54 % reported they lived in an urban envi-ronment, 25 % said suburban, 19 % said rural, and 3 %said other.
36	Men’s mean age was 27.9(SD_x0001_5.8), and women’s mean age was 26.3 (SD_x0001_5.0).				Twelve percent ofcouples were African American, 12% were Caucasian, and 76%were Hispanic				low income - Wiveshad a mean income of $28,672 (SD_x0001_$24,549), and husbands hada mean income of $34,153 (SD_x0001_$27,094).	Los Angeles area	married	38.5% of couples had childre
37	The ages of the husbands ranged from22 to 50 years, and those of the wives from 21 to 50 years.	male, female	heterosexual		Chinese		Majority of men, women had secondary or upper secondary education.	Majority of men were manual workers and majority of women were service workers.		Hong Kong	Married	More than 90% had children
38	Mostly in 20s	female	analyses focused on the 106 bisexual participants,		Mostly Caucasian					Mostly USA. Also UK, Canada, Australia	Mixed
39	360 women and 277 men between the ages of 19 and 25 (mean age of 21 years).	male, female	heterosexual		African American		13.6 % of theserespondents had not completed high school; 43.4 % hadcompleted high school or had obtained a GED, and 43 %had some college experience or had completed a Bache-lors’ degree.				nonmarital romantic partnerships
40	Husbands and wives were 30 and 28 years old, on average,respectively,	female, male	heterosexual		Mexican origin couples			Almost all hus-bands were employed (98%), as were 54% of wives	amilyincome averaged $33,217	North Carolina	legally married or “living asmarried” in consensual unions	biological children living in same households
41		male, female	heterosexual		The majority of the sample (75.5%) identified as African American, 24% identified as Hispanic/Latino, and0.5% identified as Caucasian.				45–71% of individuals were considered low income (less than$38,622 household income) and the median income in these neighborhoods was very low(range=$4,096 to $12,480; MCIC, 2010).	Chicago area	Married, average relationship length at the time of participation was 6.04 years.	average of 1.6 chil-dren.
42	ranging in age from21 to 86 years (M=51.41,SD=14.00)	63% female, male	heterosexual		74% of the sampleself-identified as White, 22% as Black/AfricanAmerican, 3% multiracial, and 1% AsianAmerican. Only 2% reported being Latino/a.		Highest level of education completed rangedfrom grade school to advanced/professionaldegree, with median completion level beinga bachelor’s degree.		Twenty percent of par-ticipants had household incomes of lessthan $50,000, 40% had household incomesbetween $50,000 and $90,000, and 41% hadhousehold incomes greater than $90,000.	US, south eastern state. onefourth (22%) of the sample resided in a ruralarea	Maritalduration ranged from less than 1 year to 66years (M=23.09,SD=16.02) and 35% ofthe unions reflected remarriages for one orboth spouses.	79% had children
43	Participants ranged in age from 18 to 72(M_x0002_34.5,SD_x0002_10.7)	women	68% identified as lesbian,11% as bisexual, 15% as queer, 4% as unlabeled, and 1% as notsure. With regard to sexual attraction, 48% reported that they wereattracted to women only, 45% were attracted more to women thanto men, 5% were equally attracted to women and men, and 2%were more attracted to men than to women.		Predominantly identified as White (87%)		70% had an undergraduate or graduate degree			50% Canada, 49% USA, 1% both countries	Most were marriedor in a common-law relationship (37%), or living with their partner(42%). Relationship duration ranged from 1 to 36 years (M_x0002_5.2,SD_x0002_5.1)
44	menwere 44.4 years old (SD=15.93) and women were 41.22 years old (SD=15.56).	female, male	heterosexual			The majority of men (58.2%) and women (50.9%) were Protestant,17.3% of men and 25.5% of women were Catholic, 15.5% of men and 13.6% of women hadother religious affiliation, and 9.1% of men and 10% of women reported no religious affiliationat all.	47.2% of men and 72.7% of women held a high school degree, whereas51.8% of men and 26.4% of women held at least an undergraduate degree.	Most men (88.1%)were either working or studying, whereas for women 45.5% were employed, 28.2% were home-makers, and 21.8% were students.	Individual income ranged from 20,000 to 80,000 USD,which at the time of data collection meant that couples were middle-class in Switzerland (Fed-eral Statistical Office, 2013)	Switzerland	Even though all couples had been together in a committed relationship for a least a year,only 75.5% of them were living together. The average length of therelationship was 18.21 years (SD=13.78).	54.5% had children
45	male, female	homosexual		Most were racial or ethnic minority					Midwest
46	female, male	heterosexual		5.3% African American (450individuals), 12% Latino/Latina (seventy-three individuals), 12%Latino/Latina, Hispanic (seventy-two individuals) and 0.5% Caucasian(three individuals).				the median income for these neighbourhoods wasbetween $4,096 and $12,48	Chicago		Recently had a baby
47	721 men and 585 women	gay, lesbian, bisexual		Seventy-seven per cent of respondents self-identified as Anglo-Saxon Australian, 6.7% as non-Anglo-Saxon European (e.g. southern and eastern European), 5.6% as Asian, 1.1% as Middle Eastern and 4.6% as mixed ethnicity.	The majority of participants were non-religious (73%), Christian (13%), Buddhist (3%), Muslim (0.9%) and Jewish (0.7%).	Fifty-nine per cent of the total sample had completed an undergraduate or postgraduate degree.		A wide range of incomes was reported with 36.1% earning less than $20,799 per year, 29.1% earning $20,800–$51,999 per year, 17.7% earning $52,000–$64,999 per year and 19% earning more than $78,000 per year.	Australia
48	male, female	heterosexual		African American		Educational attainment ranged from grade school to master’s de-gree, with 57% of husbands and 75% of wives having completedsome schooling past high school		In Year 1, 47% of husbands and63% of wives reported annual personal incomes of less than$30,000 and 19% of husbands and 10% of wives reported personalincomes greater than $50,000.	USA	Slightly under half of all marriages(46%) reflected remarriages of one or both partners	62% reported having children.
49	female, male	heterosexual	Chronic stress, blood pressure	91% were White and 7% were Black.		Both husbands and wives had an average of 13 years of education.				97% were married and 3% were living with partners. Couples were married an average of 36 years (SD = 15.3).
50			same - sex
51	The average age of parti-cipants was 20.60 (SD¼1.76 years), with ages rangingfrom 18 to 25 (we excluded participants outside of thisage range given that our focus was on emerging adultsand traditional college-aged students)	male, female	LG		73.6% Caucasian		University students		49.4% had family annual income <50,000. 29.3% between 50,000 to 100,000. 20.3% had more than 100,000	United States	On average,participants had been involved in their current relation-ship for about a year (M¼12.52 months;SD¼12.83months; Range:<1 to 96 months).
52	The average age for men was 40.64 years (SD¼8.68) and for women was 39.43 years(SD¼7.87). The average length of living in the U.S. for men was 14.27 years(SD¼8.00) and 12.37 years (SD¼7.43) for women.	male, female	heterosexual		Latino	The majority of the par-ticipants reported being Catholic (men: 72.1%; women: 80.8%).	27.9%of menand 30.7%of women reporting ‘‘not having completed high school,’’ whereas 21.2%ofmen and 24%of women reporting ‘‘graduating at least from college.	84.6%of men and 61.5%of women reported being employed.	Partners’ combinedincome was as follows: US$50,000 and above for 47.1%of couples, between US$20,000and US$49,999 for 31.7%, and below US$19,999 for 14.4%.	immigrants in USA from various countries including El Salvador (32.7%), Peru(13.9%), Mexico (12%), Guatemala (11.1%), and other Latin American countries(30.3%). Washington, DC metropolitan area
53
54	mean - 38.0 (15.0)	men (51.5%) and women (48.5%)			Cuban4.6%,Puerto Rican10.1%,Mexican56.6%,Other Latino28.7%		0–11years - 44.1%, 12 - 24.5%, 13–15 21.1%, 16 years and over 10.3%	employed - 63.1%
55	Heterosexual participants were significantlyolder than gay/bisexual participants (M=36.4,SD=9.09 and M=29.4,SD=7.13, respectively)	(87.1%)were men aged18+ years	heterosexual, gay, bisexual
56	Mean age = 50.2	male,female	15 gay couples (30 men), 15 lesbian couples (30 women), and 15 heterosexual couples (15 men and 15 women).				Some college or less=14.4% , College degree=27.8%, Postgraduate/professional=57.8%			Massachusetts, USA	Mean relationship duration = 21.3
57	Patient age mean = 46.81 ± 7.74 , spouse age mean = 45.92 ± 7.86	men, women	heterosexual		Chinese		53.8% patients had secondary or higher education. 61.2% of caregiver spouses had elementary or lower education.			China
58	the average age was22.84 (SD_x0002_3.10)	female	omen who identify as lesbian,bisexual, or queer, be mainly attracted sexually/romantically toother women		81.2% white				29.7% had parental income <40,000, 42.3% had Between $40,000 and $99,000, 26.3% had More than $100,000.	49% of the sample was from the San Francisco Bay Area.
59	at Year 1, the meanage of wives was 24.3 years (SD=3.9) and ofhusbands was 26.5 years (SD=4.1).	male, female	heterosexual		199 African American couples(66% response rate) and 174 European Amer-ican couples (65% response rate) completedthe interview.		Only 16%of participants reported having a college degree,38% reported having some college experiencebut not a degree, and 46% reported having a highschool diploma or less.		For the African Ameri-can couples, 16% reported an annual householdincome below $10,000, 46% reported an incomebetween $10,000 and $29,999 (roughly $22,300to $67,000 in 2017 dollars), 38% reportedexceeding $30,000. For European Americancouples, 63% reported an annual householdincome above $30,000, 35% reported an incomebetween $10,000 and $29,999, and 2% reportedearnings under $10,000. T	Wayne County, MI (whichincludesDetroitandsurround-ing areas)	The couples were initially interviewed withinthe first 5 to 8 months of their marriages,then at 1-year intervals for three additionalassessments.
60	60+	female, male	heterosexual		6.4% Black		Majority > 12 years of education				9.3% cohabitating, rest married	mean no. of children = 2.8 (1.7)
61	women’s ages ranged from 27 to 73 years (M = 38, SD = 7.55), while men’s ages ranged from 22 to 74 years (M = 41, SD = 8.97).	men, women	heterosexual		African American				Median income: US$41,875.00	USA	married or cohabitating
62		120 same-sex couples			47% (n = 56) of the couples consisting of two white partners, 24% (n = 29) of the couples consisting of two racial-ethnic minority partners, and 29% (n = 35) consisting of one white partner and one racial-ethnic minority partner.						six months to less than three years (n = 40), three years to less than seven years (n = 40), and seven or more years (n = 40).
63
64		male, female	sexual minority		racial minority
65
66	Ages of participants ranged from18 to 70 years (M¼33.85,SD¼0.29)	99.7%female and 0.3%intersex	lesbian/gay/homosexual (78.8%), with other participantsidentifying as bisexual (14.4%), women-loving-women(6.6%), or ‘‘other’’ nonheterosexual labels (0.2%).		White (84.4%).The rest of the participants were African American (3.9%),Latina (3.4%), biracial/multiracial (3.4%), Asian/PacificIslander (2%), Native American (0.7%), and participants whoidentified as ‘‘other’’ (2.2%).		4%of thesample had a high school diploma or less, 30.2%had somecollege education, 31.3%had a college degree, and 34.4%had a master’s degree or higher		an averageincome of US$30,000–40,000 per year		participants were in their relationships for4.33 years
67	ranging in age from 18 to 61 years (MD33.2,SDD9.2)	female	(71.9%) self-identified as lesbian, 14.1% as bisexual, 7% as gay, 4.7% asqueer, and 2.3% as other		Caucasian (75%), with 7.8% of Hispanic or Latin American ori-gin, 5.5% Asian American, 4.7% African American, 3.9% Native American, and3.1% identified as other.		well-educated, with 28.9%holding a graduate degree, 32% having graduated from college, and 31.3% havingattended some college.			Arizona, Alabama	Approximately 12.6% of participantsreported being in a committed same-sex relationship and not living together,45.7% reported being in a committed same-sex relationship and living together,18.1% were engaged and living together, and 23.6% were married
68	The sample was young (approximately 50% [n = 375] younger than 35 years)	Men	Gay or bisexual		race/ ethnicity (White, African American, and Latino/Other [Latino and other were grouped together due to small numbers of participants in these group])		Majority some college or more	76.9% were employed		Atlanta
69
70	All participants were aged 35 to 65 years	male, female	106 male same-sex couples, 157 female same-sex couples, and 115 different-sex couples.							Massachusetts		All participants legally married for a minimum of 3 years at the time of the study (2014-2015)
71	Participants age ranged from 16 to 54 yearsold (M_x0002_23.06,SD_x0002_4.75).	male	most participantsidentified as gay (78.1%), followed by bisexual (15.0%), and other(6.9%)		The racial/ethnic composition of thesample was 35.0% Black/African American, 29.1% White, 28.1%Hispanic/Latino, and 7.8% other.		12.1% had not completed highschool, 72.5% completed high school, 12.4% completed college,and 2.9% completed graduate school.				Relationship lengthranged from less than one month to 7.58 years (M_x0002_1.30 years,SD_x0002_1.47 years), and 29.1% of participants reported that theylived with their partner.
72	Age ranged from 19 to 79 years old	male, female			White/European American (65.8%)		71.2% with a bachelor’s or graduate/professional degree)		less than $50,000 per year as a couple (45.9%)	United states	54.8% married, median relationship length was 4 years ( range = 6 months to 36 years).	(31.5%) couples reported having children
73	Mean age was 27 years (range of 19–58 years).	men	heterosexual		African American		The greatest percentage of fathers had greater than a high school education (43%),		fathers that lived at greater than 200% poverty =51%	USA	Fathers that lived with the child’s mother = 73%, and were in a relationship (not mar-ried) = 72%
74	Men’smean age was 39.84 years (range: 21–83), and women’s mean agewas 36.54 years (range: 23–73).	men, women	heterosexual		African American		Men’s median education levelwas high school or GED, and women’s median education levelwas some college or trade school (ranging from less than Grade 9to a master’s degree).	The majority of men (76%; 66% full-time,9% part-time) and women (60%; 45% full-time, 16% part-time)reported full- or part-time employment.	Median monthly pretaxincome was $1,400 (range: $1–$7,500) for men and $1,400 (range:$1–$8,900) for women. The incomes of 53% of the families werebelow 100% of the poverty line, and incomes of 69% of thefamilies were below 150% of the poverty line.	Georgia	63% were married; the mean length of marriage was 9.97years (range: 0–56 years). Unmarried couples had been livingtogether for an average of 6.73 years (range: 0.25–23).	atleast one pre- or early adolescent youth residing in the home. The number ofchildren residing in the home ranged from 1–8, with a mean of2.96.
75	Mothers' mean age was 31.78 years(SD= 4.77, range = 20–41), and fathers' mean age was 33.51 years (SD= 5.18, range = 20–45)		heterosexual				66% of the mothers and 42.2% of the fathers had a university degree	Most couples were currently working (mothers: 84.6%; fathers: 90%).			The majority of couples livedtogether (married: 70.7%; cohabitating: 26.1%; in a relationship but not living together: 3.2%) andhad a committed relationship for an average of 7.40 years (SD= 4.23, range = 11 months—17 years).	Most couples were having their first child (68.5%); couples who had children before thispregnancy had, on average, one child (SD= 0.41, range = 1–3).
76	All participants were cisgender men or women, aged 35 to 65	male,female	lebian, gay, heterosexual				The sample is highly edu-cated, with 50% of respondents having a postgradu-ate degree.	% not working - 17.22 (3.78)		Massachusetts, USA	legally married, and living together for a minimum of three years at the time of the study	Whereas 71% of individuals in different-sex marriages report having children in the household, only 12.7% of men married to men and 40.4% of women married to women report children in the household.
77	The men were 35.7 yearsold (SD= 9.1 years; range: 25–62 years) and women were31.1 years old (SD= 9.3 years; range: 21–51 years)	female, male	heterosexual				62.6% of participants reporting havingB.A. degrees, 26.2% had M.A. and Ph.D. degrees, and 11.2% had high school diplomas			Iran	Married	The average number of childrenwas 2 ranging from 1 to 3.
78
79	aged 60 years or older (M=63.5;SD= 3.41)	men	gay/bisexual men				Themajority of participants reported having at least a high schooldiploma (34.5%)	close to half of participants were employed,and one third were retired.		Portugal	The majority of participants weresingle (36.4%) or married/in a civil partnership (40%).Approximately 44% of participants reported living alone	half had at least one child (43%), and 28% hadgrandchildren
80	The average participant age for mixed-sex couples was 21.7 years (SD = 4.94), and participants in same-sex couples were slightly older, with an average age of 23.54 years (SD = 6.99).	The subsample of participants in mixed-sex partner-ships (n = 3,960) consisted of about 70% participants who identified as female, whereas the subsample of participants in same-sex partnerships (n = 121) was nearly evenly divided between sexes (male = 48.76%; female = 51.24%).	same - sex, different-sex							United States	For mixed-sex relationship participants, the current or most recent relation-ship had an average duration of 14 months (SD = 8.91). Participants in same-sex relationships reported similar relationship duration, with an average duration of 13.10 months (SD = 9.08). About 39% of respondents reporting on a same-sex relationship and 38% of respondents reporting on a mixed-sex relationship were not cu…
81		female	Same sex female							United States
82
83		female	heterosexual		Korean					United States
84	The average age was 41.40 years, and theage range was 25 to 74 years.	male	male - male couples		The racial/ethnic makeups of couples were white/white(50.0 percent), black/black (20.8 percent), Asian Latino (4.2 percent), and 8.3 percent each forwhite/Latino, white/black, and white/Asian pair-ings.					Greater Atlanta and San Francisco Bay areas	The distributionof relationship categories was six months to 3years (33.3 percent), 3 to 7 years (29.2 percent),and more than 7 years (37.5 percent).
85		female	lesbian, bisexual
86
87	Male: Mean(SD)=51.27(12.36), Female: Mean(SD)=48.69(11.59)	male,female	heterosexual		African American		About 60% of female spouses reported having atleast a college degree compared to about 50% of male spouses.			Metropolitan Houston,TX areas.
88
89	The mean age of the sample was 26.35 years (SD = 7.03 years), ranging from 18 to 51 year	male, female	LGB		Chinese		Majority had some college or higher.	55% employed, 31 % student, 13.5% others			Unmarried - 81.9%, 55.2% single
90	Average age was 32.42 (SD_x0002_10.04).	cisgender male female, transgender male female, genderqueer, gender nonbinary	LGBQ	participants reported having either one disability (n_x0002_46), twodisabilities, (n_x0002_22), or three or more disability conditions (n_x0002_23).	63% white		Majority had associate's degree or higher.		Median income was$50,000.		The average length of time in the romantic relationshipwas 66 months (SD_x0002_77.79), and participants were either married(n_x0002_26) or unmarried (n_x0002_66) at the time of the study.
91	Mean age 28.26.		Gay 83.2%, Bisexual 9.9%, Queer 5.8%, Another orientation not listed 1.0%		White 56.5%, Hispanic or Latino 20.2%, Black or African American 13.7%, Multiracial 5.3%, Asian 3.0%, Other 0.9%, Native Hawaiian or Other Pacific Islander 0.3%		Majority some college or higher	Majority employed full time		USA	Majority not in a marriage.
92	60 women recruited across five study sites in rural and urban areas of California and Mexico	women			X first generation immigrant women and mexican women residing in mexico				X low-income	x 60 pregnant women in rural and urban communities in Mexico with high rates of migration to the US, among immigrant communities in rural and urban California and with US-born women of Mexican descent (Mexican Americans) in urban California		pregnant
93	Between ages 18 and 54	58% of the respondents are women;			African American		The average number of years of education is 12.86 (SD ¼ 2.06 years); 17.6% of the respondents did not have a high school diploma, whereas 13.5% had at least 4 years of college	the majority of the sample (70.2%) are working, and approximately half (49.2%) of the sample report incomes below $20,000.			26% of the respondents are married, 7.6% are separated, 16.1% are divorced, 1.4% are widowed, and 49.1% have never been married. one third of respondents report living with a spouse or partner (32%) and about 21% live alone
94		X								X
95
96								(X) employers				(X) mother
97		X gender role attitude (women)			X Jewish and Arab-Muslim	X Jewish and Arab-Muslim		X DUAL-EARNER SPOUSES		Israel
98
99	Mean age = 19 years old	251 females (73%), 90 males (19%), 12 not reported (8%)			62% intracultural relationships, 34% intercultural relationships	29% interfaith relationship, 30% intrafaith relationship				Urban mid-Atlantic university	In romantic relationship for at least one month
100	(X) young woman			(x) BRCA1/2-mutation (a mutation that predisposes to the development of tumors)
101
102	10 couples who were HIV+ seroconcordant and 10 serodiscordant couples (40 total interviews) with a mean age of 48.7 years	(x) 40 male	X homosexual	X 10 couples who were HIV+ seroconcordant and 10 serodiscordant couples. The 30 participants with HIV had been living with HIV for a median of 15 years, had been taking antiretroviral medication for a median of nearly 7 years, and reported high current adherence levels	70% White, 15% African American, and 10% Latino	unspecified	20% completed high school as the highest level of education, 32% had some college education, and 25% graduated from college	unspecified	The majority (60%) reported an annual income of less than US$20,000 per year	San Francisco	3 couples, all seroconcordant, were in the process of ending their relationships	unspecified
103
104	Average ages of lesbians and gay men were 39.09 years (SD = 5.90) and 38.74 years (SD = 4.46)	Males and females	Homosexual		Lesbian couples: 90%(n = 94) were Caucasian: 4% (n = 4) were Hispanic; 2% (n = 2) were African American; 2% (n = 2) identified as Multiracial; 1% (n = 1) was Asian; and 1% (n= 1) was Native American. Gay couples: 86% (n = 66) were Caucasian: 7% (n = 5) were Hispanic; 3% (n = 2) were African American; 3% (n = 2) were Asian; and 1% (n = 1) identified as Multiracial.				Average family incomes for lesbian and gay male couples were $108,313 (Mdn = $95,500, SD = $51,354) and $181,473 (Mdn = $152,000, SD = $120,010).		Lesbian and gay couples had been in their relationships for an average of 7.66 years (SD = 3.79) and 7.84 years (SD = 3.83), respectively	All couples currently adopting their first child
105	Women who were taking maternity leave but planned to return to employment within the following few weeks; Ranged from 20 and 53 years old (M = 34.22; [SD] = 5.13). N1 = 288 women, n2 = 259 women, and n3 = 228 women.	X women	unspecified	unspecified	unspecified	unspecified	58.8% university graduates	X The average leave duration was 24.95 weeks (SD = 38.28). Of the women, 64.6% returned to the organization they were working for before their leave. For 200 women (70.9%), this was their first return to employment after maternity leave.	unspecified	At T1: 74.7% of the women lived in Switzerland, 13.9%, in Germany, and 11.5%, in Austria	Mean partnership duration 9.52 years (SD = 5.48)	X newmothers: 156 participants had one child, 96 had two children, and 35 had three or more children (M = 1.61, SD = 0.79)
106	A total of 1,756 mothers and fathers. Yhe study is focused of fathers. Fathers age (Married: M=35.63; SD=6.40; Cohabiting: M=32.31, SD=6.72; Nonresidential romantic: M=31.38; SD=7.59; Nonresidential nonromantic: M=30.73; SD=7.33)	X 1,756 Fathers and N = 1,756 mothers (study focus on fathers	heterosexual	unspecified	413 Non-Hispanic White; 766 African American; 404 Hispanic/Latino; 48 asian; 47 American Indian; other 21	unspecified	Father's education, median (Married=some college; Cohabiting=HS graduate; Nonresidential romantic=HS graduate; Nonresidential nonromantic=HS graduate)	unspecified	unspecified	USA	X Married n = 841; Cohabiting n = 323; Nonresidential romantic n = 181; Nonresidential nonromantic n = 411	X All Fathers; some analyses are conducted on the age of the children
107		(x)		(x)
108	(X) older adult	(X) gender differences
109		X male and female		X cancer
110
111	X 248 mothers ranged in age from 14 to 21 (M = 18.3, SD = 1.7) at the birth of their baby	female	unspecified	unspecified	X African American	unspecified	completed an average of 10.7 years of school (SD = 1.6)	unspecified	Most mothers (94%) were receiving Medicaid = low income	U.S.	X relationship with the father of their baby assessed on the following options: “no relationship,” “casual friends,” “good friends,” “a couple (boyfriend)”, “engaged (fiancé)”, “married,” “he's deceased,” or “something else.” recoded into three groups; “romantic/committed” (boyfriend, engaged, married), “friends” (casual or good friends), and “no relationship” (no relationship)	mothers
112
113		X						(X)				X
114	Age:25–29 3; 30–39 2; 40–49 6; 50–59 2; 60 and older 4	female		X hospitalised women receiving treatment for cervical cancer	X Black South African 17		Never went to school 3 Up to Grade 7 8 Grade 8–10 1 Grade 11–12 5	Employed 12 Unemployed 3 Pensioner 2		Tshwane, South Africa. Region Urban 3 Rural 14	Marital status Civil marriage 5 Customary marriage 5 Co-habiting 4 Single 3	Number of children None 1 1–2 9 3–5 4 6 and more 3
115
116	107 immigrant Latino couples. On average men were 40.64 years old (SD = 8.68) and women were 39.43 years old (SD = 7.7)	X 107 males and 107 females	heterosexual		X Participants had emigrated from various countries Including El Salvador (32.7%), Peru (13.9%), Mexico (12%), Guatemala (11.1%), and other Latin American countries (30.3%)	The majority of both men (72.1%) and women (80.8%) were Catholic, whereas only 15.3% of men and 14.4% of women were affiliated to other Christian religions, 1.9% of men and 1 % of women reported to be Jewish, and 7.7% of men and 3.8% of women did not have any religious affiliation	The educational level ranged from 27.9% of men and 30.7% of women not having completed high school to 21.2% of men and 24% of women having graduated at least from college	Most men (84.6%) and women (61.5%) were employed	partners’ income: > $50,000 (47.1%), between $20,000 and $49,999 (31.7%), < $19,999 (14.4%). 32% of the couples had at least one partner reporting the presence of another household member contributing to the household income	(X) Washington, D.C. metropolitan area. The mean length of residence in the U.S. was 14.32 years (SD = 8.03; range 1 to 35 years) for men and 12.37 years (SD = 7.43; range 1 to 32 years) for women	Twenty-eight couples (26.9%) were cohabiting whereas 76 couples (73.1%) were married. On average couples had been living together for 12.09 years (SD = 7.66)	1.84 (SD = 1.22) children younger than 21 years old living in the household
117	10 Chinese international students couples	X gender socialization	heterosexual		X Chinese; cultural influence		University students			X southern United States; influences of Western culture and communism
118	mothers18 years of age or older; pregnant on (or prior to) June 10, 2008 (the onset of the Iowa floods); singleton pregnancy. On average, women were 29.3 years of age (SD = 4.7)	female	heterosexual	unspecified	97% identified as White	unspecified	unspecified	78% were employed	The majority of participants were upper-middle class (61.6%; Hollingshead SES status), and modal household income was > $70,001 (39.7%)	X Iowa, June 10, 2008 onset of floods, recruited at clinics located in areas affected by the flood.	were in committed relationships and cohabiting with their partners. Of these women, 95% were married	X mothers singleton pregnancy exposed to the flood during pregnancy
119	121 Black single-mother families with an male Cohabiting Partner and a child. mean ages of participating youth, mothers, and MCPs were 13.17 years (SD = 1.97; 56.2% girls), 38.5 years (S.D. = 7.86), and 40.66 (S.D. = 10.74), respectively	(X) female, male	unspecified (heterosexual?)	unspecified	X In all families at least one of the two adults (mother or MCP) identified as Black	unspecified	Of the mothers, 38%, 33%, and 29% did not complete high school, completed high school/GED, and some college/vocational school after high school, respectively. Of the MCPs, 29%, 57%, and 14% did not complete high school, completed high school/GED, and had some college/vocational school after high school, respectively	unspecified	X Household incomes averaged $22,726 per year (SD = $18,442)	New York City U.S.	X stepfamilies. Sixty-two percent of the mother–MCP relationships were “established” (13 months or greater) and 38% were “new” (12 months or less)	X single-mother families with an male Cohabiting Partner. The mean number of children per family was 2.09 (SD = 1.30)
120	women between the ages of 35 and 63, with a mean age of 45	X Woman			white		varied from secondary level to higher university degrees	X Manager (a long professional history of between 9 and 38 years and had held managerial positions for between 2 and 35 years)	middle or upper-middle class	Finland	one or more spouses in the course of their careers	all but one were mothers, mostly of teenage or adult children. The most common number of children was two
121	118 female nurses between the ages of 27 to 59 years (M = 40.35)	(x) female						(X) nurses		Nigeria (University of Nigerian Teaching Hospital and Orthopedic Hospital Enugu)	married and living with their husbands	X number of children (at least one)
122
123		female						(X) employed		X Israel, Korea, and the United States		(X) mothers
124	n = 35 gay and bisexual men in same-sex male relationships	men	x gay and bisexual in same-sex male relationships	serodiscordant and seroconcordant HIV-positive	White 11 (31.4%) African American/Black 20 (57.1%) Other 5 (14.3%)					Atlanta, GA, U.S.	Relationship Length: 3–6 mo 2 (5.7%); 6–12 mo 8 (22.9%) 1–4 yrs 15 (42.9%) >5 yrs 10 (28.6%)
125	12 participants aged 60 or older			X self-identifying as having been diagnosed with type 2 diabetes for at least 1 year	X Korean immigrant					(X) born in Korea but currently living in the United States
126	506 African American couples (wave 1). Participants’ ages ranged from 20 to 75 years. The median age of husbands and wives was 41 and 37years, respectively	506 husbands and wives	heterosexual		X African American				X Perceived Financial Strain: The mean personal earned income for husbands and wives was self-reported and fell in the range from US$30,000 to US$34,999 and US$25,000 to US$29,999, respectively	U.S.	first year of marriage
127
128			x gay and lesbian couples	x one or both partners reported depression
129	388 veterans women	female	X Heterosexual (n = 260) Lesbian (n = 128)	X PTSD symptoms	White 323 (83.3) African American 15 (3.9) Hispanic 21 (5.4) Other 29 (7.5)		<College 185 (47.7) College graduate 106 (27.3) Postgraduate 97 (25.0)	X Military service Veterans	<$26,000 66 (17.4) $26,000–50,000 98 (25.4) $51,000–70,000 59 (15.3) 4 ‡$71,000 163 (42.2)	U.S.	Currently married/domestic partnership Total 276 (71.1) Heterosexual 207 (79.6) Lesbain 69 (53.9)	Have dependent children living at home Total 258 (68.8) Heterosexual 162 (62.6) Lesbians 96 (75.6)
130		(X) male anf female			Asian Americans
131	9 female managers	X female			X Indian			X managers in dual earner career		X South Africa
132	158 Chinese couples X both partners had to be 60 years or older (age range 60–97 years)	(X) 158 male and 158 female	heterosexual	unspecified	(X) chinese	unspecified	(X)	both the husband and wife had to be retired	(X)	Beijing (China), 22 communities in Beijing, China, agreed to participate; 13 of them were in urban areas, and nine of them were in suburb areas	married couples (X) relationship lenght	unspecified
133	Study 1 = 163 couples, At Time 1, women’s ages ranged from 27 to 73 years (M = 38, SD = 7.55), while men’s ages ranged from 22 to 74 years (M = 41, SD = 8.97); Study 2 = 213 couples At Time 5, women’s ages ranged from 37 to 84 years (M = 48, SD = 6.25) whereas men’s ages ranged from 30 to 87 years (M = 50, SD = 8.66)	X	heterosexual		X race discrimination. All African American				X financial strain. Study 1: median annual household income US$41,875.00. Study 2: median annual household income US$45,000 and US$50,000 between US$20,000 and US$25,000 for women, and between US$25,000 and US$30,000 for men		married or cohabiting relationships
134	1,162 respondents reporting on 6,603 activities. (x) older adults (60 or over	X 609 men 553 women.	unspecified	X physical, mental, or emotional disability condition	black/not black	unspecified	unspecified	unspecified	unspecified	U.S.	married or cohabitating
135	29 managers who are fathers	X male	heterosexual		all white		Their educational background ranged from secondary level to postgraduate degrees	X Managers			in heterosexual (mostly marital) relationships
136
137	(X) 103 youth mothers; mean age at birth 18.0 years (SD 1.2; range: 14.5 – 19.9)	female			X Puerto Rican origin (Latino Culture)		32.1% had earned at least a high school degree, 27.1% had completed 11th through 12th grade, 31% had completed 9th through 10th grade, and 9.7% had completed 8th grade or lower	At time of interview, 28.2% of the mothers were attending school and 42.7% were employed	X resided in lowincome neighborhoods of a Midwestern city, and 87.4% received government assistance	Midwestern city of U.S	in a romantic relationship; The majority reported living with their partner (67%)	mother: Children’s mean age was 18.3 months (SD .94; 43.7% female; 83.5% only or first child)
138
139
140	The mean age of interview participants was 31 years.	Woman	X sexual minority women (i.e. those who self-identified as other than heterosexual and/or reported any sexual relationship with a woman in the past 5 years). Most identify as bisexual (72%), although a range of other sexual orientation identities were also reported. 6 women self-identified as heterosexual and reported sexual relationships with women in the past 5 years; as such, they met our defi…		Most (83%) identified as white		well-educated, with 12 (41%) reporting that they had completed a graduate degree programme			10 sites in Toronto, Canada and in Central/Western Massachusetts (e.g. Worcester, Holyoke, Northampton)	All but one reported that their current partner was a cisgender man; one participant was partnered with a trans woman. Most participants (90%) lived with their current partner and had been in a relationship with their current partner for two or more years (72%)	X pregnant woman attending for prenatal care
141	20 LGB people with diabetes. Their ages ranged from 25 to 69years old (mean age 47)	6 women and 14 men	X Of the women, 4 identified as lesbian and 2 as bisexual, and of the men 11 identified as gay and 3 as bisexual	X diabetes. A total of 12 had type 1 diabetes (mean duration of 25 years) and 8 had type 2 (mean duration of 5 years)	none of the participants were members of ethnic minority groups
142
143	14 black gay couples	X cisgender men	X homosexual	X HIV	X black or African American					San Francisco
144	142 individuals	X 80 men, 62 women	heterosexual		X American and Chinese; Among American-born: 78.2% White/Caucasian, 5.6% Black/African American, 11.3% Asian/Asian American, 4.2% Latino/a, and .7% as other. Among Chinese participants, 100% indicated that they were from mainland China					X U.S.; all Chinese participants had to have lived in the United States for nomore than five years	X culturally homogenous marriage (i.e., American-born participants had to be married to a nativeborn American spouse, and Chinese-born participants had to be married to a native-born Chinese spouse)
145				(X) Antenatal depressive symptoms	X Jamaican women					(X) Jamaica
146
147	X Middle-Aged, Young-Old, and Old–Old Couple								X Financial Strain
148	(x) 367 young African-American men (aged 19 - 22)	male	heterosexual men; however, men who reported same-sex activity (approximately 4%). men who identified having a “main” female sexual partner	unspecified	X African-American men. Men reported their partners were: African-American (92%); 2% Latina, 2% biracial African-American/Latina, and 2% Caucasian. The remaining 2% were categorized as “other.”	unspecified	(X) Total mean 4.34 (years?) SD =1.34, Range 1-7	42.7% employed	Mean montly income 728.46; SD = 615.25 (Range 167 - 5196)	X live in resource-poor rural environments in South Georgia	a “main” female sexual partner, defined as “a woman or girl that you have a very special or committed relationship with, such as a girlfriend or a spouse.”. 13% Living with a main partner	23.7% having a children with a main partner	(x) Culture: masculinity
149	3,464 low-income couples. Fathers were, on average, almost 2 years older than mothers in the analytic sample (29.24 vs. 26.70 years)	X 3,464 fathers and mothers	heterosexual	unspecified	A large portion of fathers reported being Black (41.70%) or White (28.20%), and a substantial number of participants also indicated being Hispanic (24.50%)	unspecified	Median level of fathers’ education was high school diploma or GED		X Low income	U.S.	65.10% of fathers and mothers coresided with each other, with 40% of the sample being married. This percentage of coresiding couples declined to 50.30% at Y5, and the percentage that were married at Y5 increased to 47%. Similarly, many couples were romantically involved with each other at Y1 (39.90%), but this proportion decreased to 18% by Y5	parents
150	251 participants, African American (X) young adults from ages 24 to 29	male	unspecified	unspecified	X African Americans	unspecified	moderate average educational attainment [percent graduating high school (89.6%) and percent graduating college (13.9%)]	most were employed (80.1%)	(X) low to moderate in annual income (M = $21,111.98)	Georgia, Iowa, or a contiguous state	in a committed relationship characterized by exclusively dating one person (51.4%), being engaged and cohabiting (11.9%), engaged or cohabiting but not both (7.2%), or married (29.5%)	had 0.61 children on average
151	X 264 aging Hispanic Americans. Mean Age 61.80 (8.71), Women = 60.25 (9.24) Men = 63.68 (7.64)	X 145 Women 119 Men			X Hispanic Americans
152		(X) men			(X) South African Indian			(X) dual career couples		South Africa
153
154	X older adults	X male and female
155	women living with mental illness			X mental illness								X mothers
156	487 African American heterosexual couples. Participants ranged in age from 20 years to 77 years (women: M = 38.22, SD = 9.18 and men: M = 39.87, SD = 9.71)	X 487 "wives" and 487 "husbands"	heterosexual	unspecified	X African American	unspecified	Approximately 37% of men and 33% of women completed some college or technical school, and an additional 25% of men and 29% of women had a college degree	unspecified	unspecified	residing in rural and urban areas of the southeastern region of the U.S	couples reported being together 10.75 years (SD = 8.63). Among those who were married, they had been married for an average of 9.81 years (SD = 9.22)	unspecified
157	X men mean age (M = 20.3, SD = 1.08)	X Male	unspecified	unspecified	X African American	unspecified	X Socioeconomic instability was assessed using four indicators measured at W1: school enrollment/employment status, unstable living arrangements, low levels of vocational engagement, and high levels of economic distress. Consistent with cumulative models of risk exposure	X Socioeconomic instability was assessed using four indicators measured at W1: school enrollment/employment status, unstable living arrangements, low levels of vocational engagement, and high levels of economic distress. Consistent with cumulative models of risk exposure	X Socioeconomic instability was assessed using four indicators measured at W1: school enrollment/employment status, unstable living arrangements, low levels of vocational engagement, and high levels of economic distress. Consistent with cumulative models of risk exposure	U.S. X Community disadvantage was assessed as a latent construct using two scales at W1. The 11-item community disorder measure captures the occurrence of deviant behaviors in the community such as gang fights, robbery or mugging, and rape or other sexual assault	in a committed romantic or sexual relationships with a main female sexual partner (e.g., a girlfriend or a spouse) at two or more waves of data collection (not necessarily the same female partner)	unspecified
158		(X)						x accademic				(X) mother
159
160	201 employed mothers living in Turkey participated in our study. Participants were between 25 and 47 years-old (M = 33.6, SD = 4.4).	X female, Gender Roles in Turkey evaljuated					A majority (n = 135, 67%) of the mothers had a university degree, 18% (n = 37) had a post education degree, and 14% (n = 29) had a high school degree	X employers		X Turkey		X Mothers
161	Study 1: Mothers with a child 12 months or under (N = 245), married or cohabiting with their romantic partner, over 18 years of age; Study 2: 40 mothers	(X) female	unspecified	unspecified	unspecified	unspecified	unspecified	unspecified	unspecified	UK	Study 1: Married or cohabitating; relationship length (M = 7.9 years, SD = 4.32 Years); Study 2: married or living together with their romantic partner	X Study 1: new mothers with a child 12 months or under; baby’s age (M = 4.70 months, SD = 4.00 months; Study 2: mother with a child between 3 - 12 months
162	378 midlife married couples (35–65 years; N = 756 individuals)	X 327 males, 429 females	X All respondents identified as cisgender. 106 gay cismales couples ; 115 heterosexual couples, 157 lesbians cisfemales couples	unspecified	Predominantly non-Hispanic White (n = 651, 86.11%), followed by Hispanic (n = 33, 3.57%), non-Hispanic Black (n = 27, 3.57%), non-Hispanic Asian (n = 19, 2.51%), non-Hispanic mixed race (n = 16, 2.12%), non-Hispanic other (n = 9, 1.19%) and non-Hispanic Native American (n = 1, 0.13%)	unspecified	Within gay males 270 partecipants (80.19%) have a college degree or more; within heterosexual males 80 (69.57%) have a college degree or more; within heterosexual females 87 (75.65%) have a college degree or more; within lesbians females 271 (86.31%) have a college degree or more;	working full times: gay males N = 162 (76.42%); heterosexual males N = 87 (75.65%); heterosexual females N = 65 (56.52%); lesbian females N = 232 (73.89%)	unspecified	outside of Massachusetts U.S.
163	148 married couples in which at least one member of the couple was diagnosed with type 2 diabetes. Participants were 65.76 years old on average (SD = 8.02; range: 50–84)	X Patients: 74 males and 74 females; spouses: 74 males and 74 females	heterosexual	couples in which at least one member of the couple was diagnosed with type 2 diabetes. Participants had an average of 1.78 (SD = 1.16) chronic conditions (including diabetes). Patients were diagnosed with type 2 diabetes, on average, for 12.13 years (SD = 7.44)	A majority of participants (68.6%) identified as non-Hispanic White, with 17.6% identifying as African American/Black, 6.4% as Asian/Pacific Islander, 4.7% as Latino, and 2.7% as American Indian/Alaskan Native	unspecified	More than half (63.5%) of participants had at least a college degree	unspecified	unspecified	U.S.	Couples were married (or in a marital-like relationship), on average, 33.34 years (SD = 14.91)	unspecified
164
165	X 23 older adult couples; 65 years or older	X gendered support dynamics (female more supportive than male)		X both currently experiencing at least one activities of daily living (ADL), instrumental activities activity of daily living (IADL), or mobility difficulty, or have a chronic illness.						Southeastern region of the US
166	husbands M=7 years (SD =3.4) and wives M=25 years (SD = 3.0)	x	heterosexual	not specified	96% of the husbands were White (n =88), and 99% of the wives were White (n =91).	not specified	average of 16 years of education (SD =2.6 (husbands)and SD=2.3 (wives))	not specified	annual income $24,000 for husbands and $17,000 for wives.	central Pennsylvania	x (newlywed ) married M=11 months (SD =6.8)
167		x
168		x (women)
169	mean age for females: 17.67 years; SD: 11.96. Mean age for males: 45.21; SD: 11.90.	x (50% male; 50% female (assumed))	heterosexual 100% (assumed)	not given	49% white; 17% asian; 16% african american; 15% hispanic; 2% other; 1% not responsive	not given	more than half reported some colege education	not given	65% reporting household income over $50,000 per year	houston, TX, USA	(x) (all married)	average of 2 children per couple
170	Wives’ M= 42 years (SD= 11.87, range =19 to 75 years) and husbands’ M=45 years (SD = 11.90, range = 20 to 75 years).	50% male, 50% female (assumed)	heterosexual (assumed)	not specified	Caucasian (49%), Asian (17%), African American (16%), Hispanic (15%), other (2%), and less than 1% not reponding.	not specified	64% reported some college	not specified	65% reported household incomes over $50,000.	Houston, Texas	Average length of marriage was 17.67 years (SD _x0001_ 11.96, range _x0001_ 2 to 52 years). Chronic illness couples were married an average of 13.45 years before diagnosis (SD _x0001_ 11.45, range _x0001_ 1 to 43 years).	not specified
171		x (men)	x (gay)
172										(x) (Switzerland)	x (stable-satisfied, stable-distressed and separated/divorced)
173		x						x (dual earner couples)	x			x (young children)
174	x (353 late adolescent and young adult college students; (mean age = 19.5 years, SD = 1.5))	x			x (inter/intracultural relationship)	x (inter/intrafaith relationships)					x (romantic relationship for at least one)
175	x	x			x
176	x (older couples: men: 40–84 years of age (M _x0001_ 67.56, SD _x0001_ 9.16); The wives were 38–80 years of age (M _x0001_ 64.8, SD _x0001_ 9.2).)	x		(x) (cognitive testing)
177	x	x (women)
178	x (18 and 30 years of age)	x (women)			x (Xhosa women)				x (poor)	x (Khayelitsha; Cape Town)		x (new mothers)
179		x (women)						x (nurse)
180		x	x (heterosexual)								x (dating group and married group: married less than 6 months, and in their first marriages)
181	x (16 to 42 year-olds: The sample consisted of 2,523 German adolescents and adults (16–42 years old, M = 32.0, SD = 7.8).)									x (In the Jena Study on Social Change and Human Development, respondents were drawn from four federal German states.These federal states represent two of the economically healthier regions in the Eastern and Western parts of Germany (Thuringia and Baden-Württemberg) and two regions experiencing serious economical problems (Mecklenburg-Western Pomerania and Schleswig-Holstein).)
182		x (The effect of avoidant coping on relationship quality varied by gender)	x (44 lesbian couples, 30 gay male couples, and 51 heterosexual couples)									x (1st year of adoptive parenthood)
183		x						x (dual-earner families)
184	(x) (age: M = 19.03 years, SD = 1.23))									x (Hong Kong and USA)
185		x			x (non-Hispanic White and non-Hispanic Black mothers)							x (mothers)
186						x (religious coping)						x (bereavement)
187		x			x (individualistic (Americans) and collectivistic (Chinese) context)
188	(x) 41.0 to 89.4 years	x (women)			x (104 (42%) of whom were Native American (enrolled members of the Lumbee tribe), 84 (34%) of whom were African American, and 61 (24%) of whom were European American)
189	x (aged 57–85 years)	x
190		x
191	x (Age 50+)	x									(x) (married)
192									x (low-income families)			x (2-year-old child)
193	x (age 45 and over)				x (mixed union, minority-minority union, white-white union)					x (Canada)	x (intermarried and endogamously married adults: currently married or cohabiting)
194	(x) Women’s mean age was 38.91 (SD_x0002_8.11) and men’s mean age was 39.81 (SD_x0002_8.96).		x (113 heterosexual couples)		x (Latino couples: The majority of men (97.4%) and women (96.5%) were Latin American immigrants and only 4.4% of the men and 3.5% of the women had been born in the USA. Participants had been born either in El Salvador (M: 31%; F: 31.9%), Guatemala (M: 12.4%; F: 10.6%), Mexico (M: 12.4%, F: 10.6%), Peru (M: 11.5%; F: 15%), or other Latin American countries (M: 26.6%, F: 30.1%).)					(x) Washington, DC
195		x			x (Latino immigrants)
196		x (women)	x (heterosexual or lesbian)
197		x									x (married less than six months and in their first marriages)
198	x (over 50 years old;)			x (musculoskeletal condition)							(x) (married)
199			x (same-sex couples)		x (interracial relationship)
200					x (Chinese)						x (newlywed couples)
201			x (heterosexual)		x (racial or ethnic composition of the participants was 75.3% African American (450 individuals), 12% Latino/Latina (seventy-three individuals), 12% Latino/Latina, Hispanic (seventy-two individuals) and 0.5% Caucasian (three individuals).)				x (low-income families (45–71% of these individuals earns less than $38,622) the median income for these neighbourhoods was between $4,096 and $12,480.)			x (Recruitment focused on couples who were expecting or had recently had a child.)
202		x (women)							x (low income mothers)	(x) (Urguguay)		x (young children: preschool children)
203												x (pregnancy)
204	x (young adult and midlife couples)		(x) (mixed-sex couples)						x (economic pressure)			x
205			x (male couples)
206	x (older couples: age range 60–97 years)	x			x (Chinese)						x (married)
207	x (aged 40 years and older: range 42 and 74 years, with a mean age of 52.8 years (standard deviation [SD] = 8.0 years).)	x (men)	x (gay identified)							(x) Australia
208		x (273 identified themselves as men, 351 as women, and 13 offered some other gender description, such as genderqueer, bigender, or transgender. The 13 people who identified as something other than a binary gender (i.e., male or female) were not included in analysis.)	x (lesbian, gay and heterosexual relationships)
209		x (women)							x	x (rural: living in rural counties (as defined by an Urban Influence Code _x0002_6),)
210	x (M age=18.0 years; SD=1.2)	x (women)			x (Latina)				x (low-income)			x (during the second year postpartum)
211		x (women)							x (low income)	x (urban)		x (prenatal care)
212			x (heterosexual)		x (intercultural)
213		x (women)										x (pregnancy)
214	x (16–29 years old)	x (men)	x (gay and bisexual)
215	x (young adults from ages 24 to 28)				x (African American)
216		x										x (first child)
217	x (Age 50_x0002_)	x									(x) (marriage)
218		x										x (children ages birth to 5 years of age)
219										x (Pakistan)	x (married)
220											(x) (married)	x (Children with ASD)
221					x (Latino)					x (neighbourhood disorder)
222	x (50+ years old: participants were 65.76 years old, on average (SD ¼ 8.02; range: 50–84))	x			(x) (there were at least 25% racial/ethnic minorities)
223	x (midlife married couples (35–65 years))	x	x (same-sex vs. different-sex relationships)								x (marriage)
224			x (men who have sex with men)
225	x (birth cohorts 1971-73, 1981-83, and 1991-93)	x						x (dual-earner relationship)		Germany

## Sheet: Excluded Articles
		KEY:	Stress literature review
			Support literature review
			Coping literature review
YEAR	APA CITATION	AGE/COHORT	GENDER	SEXUAL ORIENTATION	ABILITY STATUS	RACE/ETHNICITY	RELIGION	EDUCATION	OCCUPATION	SES	GEOGRAPHICAL LOCATION	RELATIONSHIP STATUS	PARENTAL STATUS
2000	Sandberg, J. G., & Harper, J. M. (2000). In search of a marital distress model of depression in older marriages. Aging & Mental Health, 4(3), 210–222.https://doi.org/10.1080/7136499299	Theaverageage of the husbandsin this samplewas 65 years,and 62 yearsfor the wive	male, female	heterosexual		98% Caucasian		The averagelevelof educationwas quitesimilarforbothmenan d women , 13.6an d 13.4year	lly , 70%of the wivesand 65%of the husbandswerenot employedoutsideof the homeat the timeof response	The medianindividualyearlyincomeforthe malerespondents was$20,000to $29,999;whereasthe femalerespondent’s medianscorewaslower,$10,000±$19,999			The averagelengthof marriagefor thesecoupleswas36 years.
2001	Campbell, L., Simpson, J., Kashy, D., & Rholes, W. (2001). Attachment Orientations, Dependence, and Behavior in a Stressful Situation: An Application of the Actor-Partner Interdependence Model. Journal of Social and Personal Relationships, 18(6), 821–843. https://doi.org/10.1177/0265407501186005	Mean age of men = 19.54 (SD - 1.44), mean age of women = 18.97(SD = 1.03)	Men, women	Heterosexual	Not mentioned	Not mentioned	Not mentioned	Not mentioned	Not mentioned	Not mentioned	Not explicitly mentioned - likely USA.	In this dating relationship for mean of 17.90 months(SD = 15.57)	Not mentioned
2001	Halford, W. K., Sanders, M. R., & Behrens, B. C. (2001). Can skills training prevent relationship problems in at-risk couples? four-year effects of a behavioral relationship education program. Journal of Family Psychology, 15(4), 750-768. DOI:10.1037/0893-3200.15.4.750	Adult, 18 & older	Male, female	Heterosexual	Not mentioned	Not mentioned	Not mentioned	71% of couples, atleast 1 partner had university level education.	Not mentioned	Not mentioned	Australia	Not currently married, with a plan to marry within the next 12 months at time of recruitment.	Not mentioned
2001	Kurdek, L. C., & Kennedy, C. (2001). Differences between couples who end their marriage by fault or no-fault legal procedures. Journal of Family Psychology, 15(2), 241-253. DOI:10.1037/0893-3200.15.2.241	Adult, 18 & older	male, female	Heterosexual	Not mentioned	Not mentioned	Not mentioned	Not mentioned	Not mentioned	Not mentioned	US	Divorced couples	38% with children
2001	Lorenz, F. O., Hraba, J., & Pechacova, Z. (2001). Effects of Spouse Support and Hostility on Trajectories of Czech Couples’ Marital Satisfaction and Instability. Journal of Marriage and Family, 63(4), 1068–1082. https://doi.org/10.1111/j.1741-3737.2001.01068.x
2002	Piercy, S. K., & Piercy, F. P. (2002). COUPLE DYNAMICS AND ATTRIBUTIONS WHEN ONE PARTNER HAS AN ACQUIRED HEARING LOSS: IMPLICATIONS FOR COUPLE THERAPY. Journal of Marital and Family Therapy, 28(3), 315–326. https://doi.org/10.1111/j.1752-0606.2002.tb01189.x
2003	Cano, A., & Vivian, D. (2003). Are life stressors associated with marital violence? Journal of Family Psychology, 17(3), 302-314. doi:http://dx.doi.org.ezproxy1.lib.asu.edu/10.1037/0893-3200.17.3.302	Men: Community sample - 39.22(11.99), Non-violent - 40.96(11.30), Moderately violent - 37.55(10.42), Severely violent - 35.69(9.26) Women: Community sample - 38.25(11.54), Non-violent - 38.73(11.70), Moderately violent - 33.57(8.72), Severely violent - 33.48(8.37)	Male, female	Heterosexual	Not mentioned	Not mentioned	Not mentioned	Men: Community sample - 14.55(3.58), Non-violent - 14.85(3.50), Moderately violent - 13.51(2.10), Severely violent - 13.18(2.20) Women: Community sample - 14.15(2.13), Non-violent - 14.12(2.65), Moderately violent - 14.06(2.65), Severely violent - 13.43(1.96)	Not mentioned	Men Family Income: Community sample - 54,227(26,683), Non-violent - 56,290(33,041), Moderately violent - 43,090(25,772), Severely violent - 36,539(20,772) Women Family Income: Community sample - 49,614(23,317), Non-violent - 51,118(29,962), Moderately violent - 39,160(27,643), Severely violent - 42,032(31,497)	USA
2003	Gee, C. B., & Rhodes, J. E. (2003). Adolescent mothers' relationship with their children's biological fathers: Social support, social strain and relationship continuity. Journal of Family Psychology, 17(3), 370-383. DOI:10.1037/0893-3200.17.3.370	Pregnant or parenting adolescents	Female	Heterosexual	Not mentioned	African american, Latina	Not mentioned	Alternate school for pregnant or adolescent parents - enrolled at time of study. (18%) had earned a high school diploma, an even greaterpercentage (21%) had partially completed college, and notably 1participant (1%) had completed a college degree.	28% of the participants were currently employed. Over half (59%)relied on public aid as their primary source of income, 19% relied ontheir own jobs, 9% relied on their parents, and 5% relied on a malepartner.	Low SES	USA	99% not married	43% of the participants had one child, 45% hadtwo children, 10% had three children, and 2% had four children
2003	Julien, D., Chartrand, E., Simard, M., Bouthillier, D., & Bégin, J. (2003). Conflict, social support and relationship quality: An observational study of heterosexual, gay male and lesbian couples' communication. Journal of Family Psychology, 17(3), 419-428. DOI:10.1037/0893-3200.17.3.419	Heterosexual - 32.39 (5.91), Gay(male) - 32.67 (8.40), Lesbian - 32.25 (7.31)	Male, female	42 heterosexual, 46 gay male, and 33 lesbian couple	Not mentioned	Not mentioned	Not mentioned	With college degree: Heterosexual - 47%, Gay - 35%, Lesbian - 38%	Working full time: Heterosexual - 55%, Gay - 62%, Lesbian - 64%	Not mentioned	Montreal and suburbs	Cohabitating couples. Years together: Heterosexual - 6.38 (4.39), Gay - 4.93 (3.47), Lesbian - 5.42 (5.03)	Couples with children: Heterosexual - 59%, Gay - 12%, Lesbian - 11%
2003	Leinonen, J. A., Solantaus, T. S., & Punamäki, R. (2003). Social support and the quality of parenting under economic pressure and workload in finland: The role of family structure and parental gender. Journal of Family Psychology, 17(3), 409-418. DOI:10.1037/0893-3200.17.3.409	Longitudinal study - 1,320 children were recruited from a cohort of all second-grade student. When children were 12 years old: The mothers ranged in age from 30 to 59 years, with a medianof 40 years; fathers’ages ranged from 28 to 66 years, with amedian of 41 years.	Male, female	Heterosexual	Not mentioned	Not mentioned	Not mentioned	In two-parent families, 12% had no further education,15% had some vocational schooling, 50% had senior high schoollevel of education, and 20% of the mothers and 25% of the fathers had university degrees. In one-parent families, 20% had no furthereducation, 21% had vocational schooling, 39% had a senior highschool level of education, and 16% of the mothers and 24% of thefathers had university degr…	The unemploymentfigures within the past year were 14% for themothers and 18% for the fathers in two-parent families and 17%for the mothers and 14% for the fathers in one-parent families.	In two-parent families, 27% lower; 33% lower middle class; 21% upper middle class; and 19% upper class. In one-parent families, 34% of the mothers and 52% of the fathers - lower class; 41% of the mothers and 24% of the fathers - lower middle class; 16% of the mothers and 10% of the fathers - upper middle class; and 9% of the mothers and 14% of the fathershad - upper class).	Finland	Two - parent, single - parent.	Parents
2003	Peterson, B. D., Newton, C. R., & Rosen, K. H. (2003). Examining Congruence Between Partners’ Perceived Infertility-Related Stress and Its Relationship to Marital Adjustment and Depression in Infertile Couples. Family Process, 42(1), 59–70. https://doi.org/10.1111/j.1545-5300.2003.00059.x	Males were old& than females with a mean age of 33.8 years, compared to 32.3 years for females	male, female	heterosexual	infertility						Canada	Participants reported a mean marital duration of 7.1 years
2003	Schilling, E. A., Baucom, D. H., Burnett, C. K., Allen, E. S., & Ragland, L. (2003). Altering the course of marriage: The effect of PREP communication skills acquisition on couples' risk of becoming maritally distressed. Journal of Family Psychology, 17(1), 41-53. DOI:10.1037/0893-3200.17.1.41	Adults	Male, female	Heterosexual	Not mentioned	Not mentioned	Church going	Not mentioned	Not mentioned	Not mentioned	US	Premarital couples	Not mentioned
2003	Uebelacker, L., Courtnage, E., & Whisman, M. (2003). Correlates of Depression and Marital Dissatisfaction: Perceptions of Marital Communication Style. Journal of Social and Personal Relationships, 20(6), 757–769. https://doi.org/10.1177/0265407503206003	Younger than 65. Mean age 42.3years, SD = 8.5. Married for mean of 15.8 years, Sd = 9.8	Women, men	Heterosexual	Not mentioned	91% White, 6% African American, 3% Hispanic, 1% other	Not mentioned	Not mentioned	Not mentioned	Not mentioned	Not explicitly mentioned - likely USA.	Married	85% were parents
2003	Umberson, D., Anderson, K. L., Williams, K., & Chen, M. D. (2003). Relationship Dynamics, Emotion State, and Domestic Violence: A Stress and Masculinities Perspective. Journal of Marriage and Family, 65(1), 233–247. https://doi.org/10.1111/j.1741-3737.2003.00233.x	Approximatelt 32 years mean for both violent and nonviolent groups.	Men			larger number of Latino respondents among theviolent participants than the nonviolent participants		Approx 13+ years of education for both groups.		Approximately annual income of 34K for nonviolent participants, 29k for violent participants.		Married re-spondents (56% of the sample) had been marriedfor an average of 6.5 years, and cohabiting re-spondents (27%) had been living with their part-ners for an average of 3 years. Respondents whowere separated (18%) at the time of the interviewhad been recently separated and remained in-volved with their partners.
2003	Umberson, D., Anderson, K. L., Williams, K., & Chen, M. D. (2003). Relationship Dynamics, Emotion State, and Domestic Violence: A Stress and Masculinities Perspective. Journal of Marriage and Family, 65(1), 233–247. https://doi.org/10.1111/j.1741-3737.2003.00233.x	Mean = 32.810, SD = 6.8	Men	heterosexual		71% European American		Mean = 13.905, SD = 1.578				Married re-spondents (56% of the sample) had been marriedfor an average of 6.5 years, and cohabiting re-spondents (27%) had been living with their part-ners for an average of 3 years. Respondents whowere separated (18%) at the time of the interviewhad been recently separated and remained in-volved with their partners.
2003	Umberson, D., Anderson, K. L., Williams, K., & Chen, M. D. (2003). Relationship Dynamics, Emotion State, and Domestic Violence: A Stress and Masculinities Perspective. Journal of Marriage and Family, 65(1), 233–247. https://doi.org/10.1111/j.1741-3737.2003.00233.x
2004	Cano, A., O’leary, K., & Heinz, W. (2004). Short-Term Consequences of Severe Marital Stressors. Journal of Social and Personal Relationships, 21(4), 419–430.https://doi.org/10.1177/02654075040448388	Mean = 40.87, SD = 8.64. Married for Mean = 13.14, SD = 10.40	Women	Heterosexual	Not mentioned	96% Caucasian, 4% Hispanic	Not mentioned	Some college education, mean = 14.62, SD = 2.5	Employed	Mean annual income = $73,409, SD = $45,409	Not explicitly mentioned - likely USA.	Married	Not mentioned
2004	Carr, D. (2004). Gender, Preloss Marital Dependence, and Older Adults’ Adjustment to Widowhood. Journal of Marriage and Family, 66(1), 220–235.https://doi.org/10.1111/j.0022-2445.2004.00016.xx
2004	Cranford, J. (2004). Stress-buffering or stress-exacerbation? Social support and social undermining as moderators of the relationship between perceived stress and depressive symptoms among married people. Personal Relationships, 11(1), 23–40. https://doi.org/10.1111/j.1475-6811.2004.00069.x	76% were women. Participants ranged in age from 24 to 82 years old (M ¼ 45.5, SD ¼ 13.4).	Male, female			94% white	the modal cat- egory for religious orientation was Catholic.	The modal category for ed ucation was some college		the modal category for annual house- hold income was greater than $80,000	Albany, New York	Married, 80%) indicated that this was their first marriage
2004	Kurdek, L. A. (2004). Are Gay and Lesbian cohabiting couples really different from heterosexual married couples? Journal of Marriage and Family, 66(4), 880–900.https://doi.org/10.1111/j.0022-2445.2004.00060.xx
2004	Young, S. (2004). Factors that Influence Recipients’ Appraisals of Hurtful Communication. Journal of Social and Personal Relationships, 21(3), 291–303.https://doi.org/10.1177/02654075040428333	Age - 18 to 44, mean = 21.34, SD = 3	89 male, 187 female	Not mentioned	Not mentioned	Not mentioned	Not mentioned	Undergraduate students	Students	Not mentioned	Not explicitly mentioned - likely USA.	Not mentioned	Not mentioned
2005	Balsam, K. F., & Szymanski, D. M. (2005). Relationship Quality and Domestic Violence in Women’s Same-Sex Relationships: The Role of Minority Stress. Psychology of Women Quarterly, 29(3), 258–269. https://doi.org/10.1111/j.1471-6402.2005.00220.x	18 to66 years, with a mean age of 34.75 years (SD=10.27)	female	female - female		85% European American, 6% AfricanAmerican/Black, 2% Hispanic/Latina, 1% Asian Ameri-can/Pacific Islander, 1% Native American, and 4% biracialwomen.		1% some or no high school, 3% high school diploma,20% some college, 30% college degree, 16% some graduateschool, and 30% graduate/professional school.		total household income included 5% under $10,000, 20%$10,000–$29,999, 26% $30,000–$49,999, 23% $50,000–$69,999, 12% $70,000–$89,999, and 16% $90,000 or more.	participants included 41% Northeast, 22%South, 16% Midwest, 18% West, and 3% Canada.
2005	Todosijevic, J., Rothblum, E. D., & Solomon, S. E. (2005). Relationship Satisfaction, Affectivity, and Gay-Specific Stressors in Same-Sex Couples Joined in Civil Unions. Psychology of Women Quarterly, 29(2), 158–166. https://doi.org/10.1111/j.1471-6402.2005.00178.x	Lesbian- 44.0 (9.1), Gay Male- 45.5 (10.2)	male,female	lesbian, gay		Majority were White		Lesbian couples had higher mean levels of education than did gay male couples,		gay male couples had higher mean incomes	USA
2006	Bratter, J. L., & Eschbach, K. (2006). “What about the couple?” Interracial marriage and psychological distress. Social Science Research, 35(4), 1025–1047.https://doi.org/10.1016/j.ssresearch.2005.09.0011		male, female	heterosexual		White, African American, Hispanic, Asian, Indian					United States	Married
2006	Kurdek, L. A. (2006). Differences Between Partners From Heterosexual, Gay, and Lesbian Cohabiting Couples. Journal of Marriage and Family, 68(2), 509–528.https://doi.org/10.1111/j.1741-3737.2006.00268.xx
2006	Otis, M., Rostosky, S., Riggle, E., & Hamrin, R. (2006). Stress and relationship quality in same-sex couples. Journal of Social and Personal Relationships, 23(1), 81–99. https://doi.org/10.1177/0265407506060179	18 +		homosexual							Respondents were from 28 U.S. states	In a relationship for atleast 6 months.
2007	Caetano, R., Ramisetty-Mikler, S., Caetano Vaeth, P. A., & Harris, T. R. (2007). Acculturation Stress, Drinking, and Intimate Partner Violence Among Hispanic Couples in the U.S. Journal of Interpersonal Violence, 22(11), 1431–1447. https://doi.org/10.1177/0886260507305568		male, female	heterosexual		Hispanic
2007	Clarkwest, A. (2007). Spousal Dissimilarity, Race, and Marital Dissolution. Journal of Marriage and Family, 69(3), 639–653.https://doi.org/10.1111/j.1741-3737.2007.00397.xx
2007	Goldfarb, M. R., Trudel, G., Boyer, R., & Préville, M. (2007). Marital relationship and psychological distress: Its correlates and treatments. Sexual and Relationship Therapy, 22(1), 109–126. https://doi.org/10.1080/14681990600861040
2007	Iwasaki, Y., & Ristock, J. L. (2007). The nature of stress experienced by lesbians and gay men. Anxiety, Stress, and Coping, 20(3), 299–319.https://doi.org/10.1080/106158007013032644	Participants ranged in age from 21 to 48 (average_x001E_33.5).	three focus groups: (a) lesbian-only group (10 females), (b) gay men-only group (10 males),and (c) mixed lesbian and gay men group (four females and six males)	lesbian or gay		Aboriginal (six), Asian (one), Black (one), Caucasian (21), or Francophone (one).		More than half of theparticipants completed a university or college degree	A greater number of gay men (11)were employed full-time (35 hours/week or more) than lesbian females (six), while twolesbians and one gay man were unemployed.	The participants reported a wide range of yearly household income*from below$10,000 to $90,001_x0002_$100.000. However, roughly half of the sample (i.e. 14 individuals(47%): seven lesbians and seven gay men) had yearly household income of less than$30,000, with four participants (13%) below $10,000.	Canada	more than half of the participants indicated that they were in arelationship with a partner, whereas six gay men and five lesbians noted that they weresingle.
2007	Rostosky, S. S., Riggle, E. D. B., Gray, B. E., & Hatton, R. L. (2007). Minority Stress Experiences in Committed Same-Sex Couple Relationships. Professional Psychology, Research and Practice, 38(4), 392–400. https://doi.org/10.1037/0735-7028.38.4.392	The mean age of couple members was 34.5 years (SD_x0001_9.05).				Eighty-five percent of the participants were European or Amer-ican White; 6% identified as African American, and 8% as other,non-White and non-African American racial or ethnic identities.		Justover 1 in 4 (27.4%) participants had some college education(including those currently attending college), 32% had collegedegrees, and 31.3% had postbaccalaureate graduate or professionaldegrees.		The median reported household income bracket was$30,000–$39,999.		The mean length of relationship was 5.33 years;35% had been in a relationship between 6 months and 2 years, 31%had been together between 2 and 5 years, and 34% had beentogether more than 5 years (up to 23 years). The majority of thecouples lived together (89.5%).
2008	Badr, H., Acitelli, L. K., & Carmack Taylor, C. L. (2008). Does talking about their relationship affect couples’ marital and psychological adjustment to lung cancer? Journal of Cancer Survivorship, 2(1), 53–64. https://doi.org/10.1007/s11764-008-0044-3
2008	Blair, K., & Holmberg, D. (2008). Perceived social network support and well-being in same-sex versus mixed-sex romantic relationships. Journal of Social and Personal Relationships, 25(5), 769–791. https://doi.org/10.1177/0265407508096695			same-sex partners, mixed-sex partners
2008	Brock, R. L., & Lawrence, E. (2008). A longitudinal investigation of stress spillover in marriage: Does spousal support adequacy buffer the effects? Journal of Family Psychology, 22(1), 11-20. DOI:10.1037/0893-3200.22.1.11			heterosexual		non-Caucasian individuals		modal years of education were 14		Low income	Iowa	married	some were parents
2008	Davis, K., Benjamin Goodman, W., Pirretti, A., & Almeida, D. (2008). Nonstandard Work Schedules, Perceived Family Well-Being, and Daily Stressors. Journal of Marriage and Family, 70(4), 991–1003. https://doi.org/10.1111/j.1741-3737.2008.00541.x	Respondents on averagewere 44.10 years of age (SD¼10.73)	male, female	heteosexual		Majority Caucasian		All had some college education.	worked an average of 43.97 hoursper week (SD¼15.72; range 2 – 142)	median household income of $58,000	USA	married for 21.55years (SD¼11.95; range 1 – 52 years).
2008	Lavee, Y., & Ben-Ari, A. (2008). The Association of Daily Hassles and Uplifts with Family and Life Satisfaction: Does Cultural Orientation make a Difference? American Journal of Community Psychology, 41(1), 89–98. https://doi.org/10.1007/s10464-007-9146-8	mean age about 39 with an SD about 10	Forty-four percent of the total sampleand of both Jewish and Arab subsamples were males, andthe rest (56%) were females.	heterosexual		Arab, Jewish	Arab, Jewish: Ofthe Arab sample, 76% were Moslem, 13% were Christians,and 11% were Druze, a distribution that closely resemblestheir proportions in the Israeli population				Israel	married and living with theirspouses.
2008	Mohr, J., & Daly, C. (2008). Sexual minority stress and changes in relationship quality in same-sex couples. Journal of Social and Personal Relationships, 25(6), 989–1007. https://doi.org/10.1177/0265407508100311	18–45 years (M= 22.65,SD= 5.11)	62.2% were female and 37.8% were male.	13% self-identified asbisexual, 82% self-identified as gay or lesbian, and 5% identified as ‘other’.							13 states: 6% were from the Pacific coast,47% from the South, 19% from the Midwest, 6% from the Southwest, and22% from the Northeast.
2008	Nilsson, J. E., Brown, C., Russell, E. B., & Khamphakdy-Brown, S. (2008). Acculturation, Partner Violence, and Psychological Distress in Refugee Women From Somalia. Journal of Interpersonal Violence, 23(11), 1654–1663. https://doi.org/10.1177/0886260508314310	ages rangedfrom 20 to 68 (M=37.93,SD=12.75).	women	heterosexual		Somalian(African)	All but one identified as Muslim	15 reported having had 0 to 1 year of formal education, 14 reported 2 to7 years of education, and 25 reported 8 to 12 years of education.			USA(Somalian refugees)	married	8% reported having children and the number of childrenranged from 1 to 10 (M=4.29;SD=2.95).
2009	Aytaç, I., & Rankin, B. (2009). Economic Crisis and Marital Problems in Turkey: Testing the Family Stress Model. Journal of Marriage and Family, 71(3), 756–767. https://doi.org/10.1111/j.1741-3737.2009.00631.x	Couples between the ages of 21and 58	male, female	Heterosexual		Turkish				Urban	Turkey	Married
2009	Lyons, K. S., Stewart, B. J., Archbold, P. G., & Carter, J. H. (2009). Optimism, Pessimism, Mutuality, and Gender: Predicting 10-Year Role Strain in Parkinson’s Disease Spouses. The Gerontologist, 49(3), 378–387. https://doi.org/10.1093/geront/gnp046
2009	Papp, L., Cummings, E., & Goeke-Morey, M. (2009). For Richer, for Poorer: Money as a Topic of Marital Conflict in the Home. Family Relations, 58(1), 91–103.https://doi.org/10.1111/j.1741-3729.2008.00537.xx	Husbands’ ages ranged from 25 to 50 years (M ¼ 39 years, SD ¼ 6 years) and wives’ ages ranged from 25 to 50 years (M ¼ 37 years, SD ¼ 5 years).	male, female	heterosexual		Of the husbands, 94 were Caucasian and 6 were African American. Of the wives, 93 were Caucasian, 6 were African American, and 1 was biracial.				one couple earned less than $10,000 per year, one between $10,001 and $25,000, 23 between $25,001 and $40,000, 45 between $40,001 and $65,000, 18 between $65,001 and $80,000, and 12 more than $80,001		On average, couples had been married for 12 years (SD ¼ 5.5 years).	All participants were parents and had an average of 2 or 3 children (range ¼ 1 – 6).
2009	Pruchno, R., Wilson-Genderson, M., & Cartwright, F. P. (2009). Depressive Symptoms and Marital Satisfaction in the Context of Chronic Disease: A Longitudinal Dyadic Analysis. Journal of Family Psychology, 23(4), 573–584. https://doi.org/10.1037/a0015878	Mean (SD) patient age (years)69.8 (8.2), Mean (SD) spouse age (years)67.9 (9.0)	female, male	heterosexual	chronic illness	Patient: White85.1%, African American10.8%, Other4.1%		Mean (SD) patient education (years)14.2 (3.2), Mean (SD) spouse education (years)13.7 (2.6)		Mean (SD) household income (annual $)43,942 (26,090)		Mean (SD) years married41.2 (13.2)
2010	Conger, R., Conger, K., & Martin, M. (2010). Socioeconomic Status, Family Processes,and Individual Development. Journal of Marriage and Family, 72(3), 685–704. https://doi.org/10.1111/j.1741-3737.2010.00725.x	***REVIEW ARTICLE***
2010	Fingerhut, A., & Maisel, N. (2010). Relationship formalization and individual and relationship well-being among same-sex couples. Journal of Social and Personal Relationships, 27(7), 956–969. https://doi.org/10.1177/0265407510376253			same-sex couples
2010	Iida, M., Parris Stephens, M. A., Rook, K. S., Franks, M. M., & Salem, J. K. (2010). When the Going Gets Tough, Does Support Get Going? Determinants of Spousal Support Provision to Type 2 Diabetic Patients. Personality & Social Psychology Bulletin, 36(6), 780–791. https://doi.org/10.1177/0146167210369897	On average, patients were 66.1 years of age (SD= 7.7) and spouses were 66.0 years of age (SD= 8.8).	male, female	heterosexual		Three fourths of patients were Caucasian (75.0%), and the remain-der were African American (23.6%), Asian American (0.8%), and Native American (0.8%). Similarly, 77.0% of spouses were Caucasian, and the remainder were African American (21.3%), Asian American (0.8%), and Native American (0.8%).		Patients had completed an average of 13.8 years (SD= 2.4) of education and spouses had completed 13.8 years (SD= 2.4).		aver-age household income was between $30,000 and $39,999.		marriage or marriage-like relationship
2010	Keizer, R., Dykstra, P. A., & Poortman, A. (2010). The transition to parenthood and well-being: The impact of partner status and work hour transitions. Journal of Family Psychology, 24(4), 429-438. DOI:10.1037/a0020414			heterosexual							Netherlands		With and without children
2010	Manne, S., & Badr, H. (2010). Intimacy processes and psychological distress among couples coping with head and neck or lung cancers. Psycho-Oncology (Chichester, England), 19(9), 941–954. https://doi.org/10.1002/pon.1645		female, male	heterosexual - 96.3%	head, neck cancer	White - 92.7%		Majority - some college or higher				95.4% - married, rest cohabitating. Average length - Mpatients=32.0, SD=14.5 years, range53–55years;Mpartners=31.8 years, SD=14.6, range52–55 years
2010	NEGY, Charles, et al. "The importance of addressing acculturative stress in marital therapy with Hispanic immigrant women". International Journal of Clinical and Health Psychology. Vol. 10, No. 1 (2010). ISSN 1697-2600, pp. 5-21	The average age of the participants was 40.4 years old (SD =9.88) and ranged from 20 to 70 years of age	female	heterosexual		Thirty-seven of the women self-identified as Puerto Rican,24 as South American (11 Colombians, 6 Venezuelans, 4 Brazilians, 3 Peruvians), 17 asCuban American, 8 as Central American (8 Panamanians), 4 as Mexican American, and5 as Other (3 Dominican Republican, and two did not specify their specific Hispanicsubgroup membership).		M number of years of education = 14.92)		average annual family income between $40,000 to $50,000	United States	Married	Aberage of 2 children
2010	Pistole, M. C., Roberts, A., & Chapman, M. L. (2010). Attachment, relationship maintenance, and stress in long distance and geographically close romantic relationships. Journal of Social and Personal Relationships, 27(4), 535–552. https://doi.org/10.1177/0265407510363427	Mean age = 21yrs	25% men, 75% women	heterosexual		Caucasian (n= 404;Pistole et al.:Relational maintenance in LDR’s539 85.4%), while 13 (2.7%) African American, 8 (1.7%) Latino/a, 21 (4.4%)Asian American, and 25 (5.3%) other were included.		Six (1.3%) participantswere high school graduates, 117 (24.7%) were first year undergraduates,92 (19.5%) were sophomores, 80 (16.9%) juniors, 92 (19.5%) seniors, 84(27.8%) graduate students, and 2 (0.4%) other.
2010	Riggle, E. D. B., Rostosky, S. S., & Horne, S. G. (2010). Psychological distress, well-being, and legal recognition in same-sex couple relationships. Journal of Family Psychology, 24(1), 82-86. DOI:10.1037/a0017942		7% women	same-sex		88% white		Over 70% of the sample reported having a BAor higher degree; 18.7% of the sample reported being col-lege students	64% were employed full time	The average annual personal income category was $40,000to $50,000.	USA
2010	Sheridan, M., Sherman, M., Pierce, T., & Compas, B. (2010). Social support, social constraint, and affect in spouses of women with breast cancer: The role of cognitive processing. Journal of Social and Personal Relationships, 27(1), 5–22. https://doi.org/10.1177/0265407509347836			heterosexual	non-metastatic breastcance	pri-marily Caucasian (n= 96), with four identifying as a minority (two NativeAmerican and two of mixed/other ethnicity), and five choosing not toidentify ethnicity.		The majority (n= 72) reported having an Associate degreeor higher level of education.
2010	WICKRAMA, K. A. S., BRYANT, C. M., & WICKRAMA, T. K. A. (2010). Perceived community disorder, hostile marital interactions, and self-reported health of African American couples: An interdyadic process. Personal Relationships, 17(4), 515–531. https://doi.org/10.1111/j.1475-6811.2010.01299.x	The mean age, medianage, and age range for wives were 32.5, 29,and 20 – 70 years, respectively. The mean age, median age, andage range for husbands were 35, 32, and20 – 75 years, respectively	men, women	heterosexual		African American		Wives - 65.6% had more than a high school education, husbands - 50.7% had more than a highschool education,	Wives - 52.7% worked 40 hror more per week. Husbands - 79.6% worked 40 hours or more per week.	Wives - 85.1% had incomesbelow $40,000. Husbands - 71.1% had incomes below $40,000.	Southern United States
2011	Carvalho, A. F., Lewis, R. J., Derlega, V. J., Winstead, B. A., & Viggiano, C. (2011). Internalized Sexual Minority Stressors and Same-Sex Intimate Partner Violence. Journal of Family Violence, 26(7), 501–509. https://doi.org/10.1007/s10896-011-9384-2	Age ranged from 18 to 51+	male, female	67 lesbians (25%) and 71 (23%) gay men reported that theyhad been victims of same-sex IPV. Twenty-five lesbians(9.3%) and 26 gay men (8.3%) reported they hadperpetrated same-sex IPV		Most of the participants in this samplewere Caucasian (79%)		With respect to education, over90% completed at least some college.				Thirty-eight percentof the sample described themselves as single, 13% as in adating relationship, and 49% in a committed long termrelationship.
2011	Condit, M., Kitaji, K., Drabble, L., & Trocki, K. (2011). Sexual-Minority Women and Alcohol: Intersections Between Drinking, Relational Contexts, Stress, and Coping. Journal of Gay & Lesbian Social Services, 23(3), 351–375. https://doi.org/10.1080/10538720.2011.588930	Age of participants ranged from 25to 63 years of age.	women	participants identified in many differ-ent ways (queer, lesbian, gay, bisexual, pansexual, butch, and heterosexualwith significant same-sex relationships).		Half of the participantsidentified as White or Caucasian and the other half described diverse ormixed-race ethnic identities (including African-American, Native American,Asian-American, half-Peruvian, and half-Japanese).		All participants had at least one year of college andnearly half had completed graduate-level education.
2011	Falconier, M. K., & Epstein, N. B. (2011). Couples Experiencing Financial Strain: What We Know and What We Can Do. Family Relations, 60(3), 303–317.https://doi.org/10.1111/j.1741-3729.2011.00650.xx
2011	Frost, D. M. (2011). Stigma and intimacy in same-sex relationships: A narrative approach. Journal of Family Psychology, 25(1), 1-10. DOI:10.1037/a0022374		male, female	same -sex		Most participants (n_x0001_77) identified as White, followed by Black/African-American (n_x0001_11), and Asian (n_x0001_6).					USA
2011	Hui, S. A., Elliott, T. R., Martin, R., & Uswatte, G. (2011). Family caregivers’ attributions about care-recipient behaviour: Does caregiver relationship satisfaction mediate the attribution-distress relationship? British Journal of Health Psychology, 16(3), 642–659. https://doi.org/10.1348/2044-8287.002003
2011	Kamen, C., Burns, M., & Beach, S. R. H. (2011). Minority Stress in Same-Sex Male Relationships: When Does It Impact Relationship Satisfaction? Journal of Homosexuality, 58(10), 1372–1390. https://doi.org/10.1080/00918369.2011.614904	ranged in age from 18 to 84, witha mean age of 34.0 years (SD=12.5)	men	The major-ity (70%,n=99) reported “exclusively homosexual” sexual orientation on the Kinsey scale.		The majority (81%) of the sam-ple reported White or non-Hispanic for their race or ethnicity (n=110),with 8.4% reporting mixed or other (n=12), 6.3% reporting Hispanic orLatino (n=9), 3.5% reporting Asian or Pacific Islander (n=5), and .7%reporting African American (n=1) for their race or ethnicity.		The modalresponse for level of education completed was “graduate degree.		Themajority (41%,n=58) of individuals reported an income of $0 to $30,000 ayear.	USA	equal portions of the sample reported being ina non-cohabiting dating relationship (n=51), cohabiting with their datingpartners (n=42), or having a formal commitment or marriage with a malepartner (n=49).
2011	Myers-Walls, J., Frias, L., Kwon, K., Ko, M., & Lu, T. (2011). Living Life in Two Worlds: Acculturative Stress among Asian International Graduate Student Parents and Spouses. Journal of Comparative Family Studies, 42(4), 455–478. https://doi.org/10.3138/jcfs.42.4.455
2011	O’Rourke, N., Claxton, A., Kupferschmidt, A., Smith, J., & Beattie, B. (2011). Marital idealization as an enduring buffer to distress among spouses of persons with Alzheimer disease. Journal of Social and Personal Relationships, 28(1), 117–133. https://doi.org/10.1177/0265407510386135			heterosexual	Alzheimer disease	Mostly caucasian						Married
2011	Song, Z., Foo, M.-D., Uy, M. A., & Sun, S. (2011). Unraveling the Daily Stress Crossover Between Unemployed Individuals and Their Employed Spouses. Journal of Applied Psychology, 96(1), 151–168. https://doi.org/10.1037/a0021035	Among the 100 unemployed participants, 73were women. Their ages ranged from 29 to 54 with a mean of 42.0years. For the employed spouses, the mean age was 42.9 years,with a range of 27 to 58.	male, female	heterosexual		Chinese		Unemployed spouses: Most had secondary or high school education (82.6%). Only15.3% had completed higher education. Employed spouses: bout 69.7% had secondary or highschool education, and the rest had completed higher education.	Unemployed spouses: More than half (57.0%)previously held jobs in production, transportation, and commerce.The rest were in professional (16.9%), administrative support(11.2%), managerial (6.7%), and in the “other” category (7.9%).On average, they had been unemployed for 2.53 years (SD_x0001_2.66). Employed spouses: Some 30.1% were working in production and transportation in-dustries, 22.6% in ad…		Tiexi Districtof Shenyang, a city in Northeast China
2012	Baucom, D. H., Kirby, J. S., Pukay-Martin, N. D., Porter, L. S., Fredman, S. J., Gremore, T. M., Keefe, F. J., & Atkins, D. (2012). Men’s Psychological Functioning in the Context of Women’s Breast Cancer. Journal of Marital and Family Therapy, 38(2), 317–329. https://doi.org/10.1111/j.1752-0606.2009.00133.x
2012	Bierman, A. (2012). Functional Limitations and Psychological Distress: Marital Status as Moderator. Society and Mental Health, 2(1), 35–52.https://doi.org/10.1177/21568693124428844	Mean=52.406	male, female
2012	Dellve, L., & Ahlborg, T. (2012). Partner relationships and long-term sick leave among female workers: consequences and impact on dimensions of health and return to work. Scandinavian Journal of Caring Sciences, 26(4), 720–729. https://doi.org/10.1111/j.1471-6712.2012.00985.x	The largest percentage were in the 45–54 age group(n = 102; 45%), while about one-third each were >54(27%) or 30–44 years old (28%).	female		One-third (33%) had both a musculoskeletal disorder anda mental disorder.				The participants were working within elderly care and homecare (n = 69), in preschools (n = 52), schools (n = 41),social care (n = 16), care of the disabled (n = 15), admin-istration (n = 12) and a cleaning/cooking service (n = 8).		City of Gothenburg, Sweden	Most respondents were living with a partner (n = 207; 92%),74% being married and 17% cohabiting. Some (n = 18;8%) were in a partner relationship but not living together.The mean length of time in the current partner relation-ship was 20 years (median (md), 20; range, 1–45 years)	About half of the par-ticipants (n = 121; 54%) had children living at home.
2012	Feinstein, B. A., Goldfried, M. R., & Davila, J. (2012). The Relationship Between Experiences of Discrimination and Mental Health Among Lesbians and Gay Men: An Examination of Internalized Homonegativity and Rejection Sensitivity as Potential Mechanisms. Journal of Consulting and Clinical Psychology, 80(5), 917–927. https://doi.org/10.1037/a0029425	The mean age of the sample was 31.24years (SD_x0001_11.67; range_x0001_18–72),		lesbian, gay only		The racial/ethnic composition of the sample was 76% Caucasian/White, 7% Hispanic/Latino, 6% African American/Black, 5%Asian, and 6% other.		The highest level of education completed by participants included high school (4%), some college(24%), 2-year college degree (8%), 4-year college degree (37%),master’s degree (17%), doctoral degree (8%), and other (2%).		the median income wasbetween $30,000 and $39,999
2012	Kim, J. (2012). Acculturation Phenomena Experienced by the Spouses of Korean International Students in the United States. Qualitative Health Research, 22(6), 755–767. https://doi.org/10.1177/1049732311431442	ranged in age from 26 to 38 years	women	not mentioned		Korean		Each participant had received her bachelor’s degree before entering the United States.	Participant had a professional career in Korea prior to immigration.		Korean immigrant in USA	married	Four of the participants had young children.
2012	Lewis, R., Kholodkov, T., & Derlega, V. (2012). Still Stressful After All These Years: A Review of Lesbians’ and Bisexual Women’s Minority Stress. Journal of Lesbian Studies, 16(1), 30–44. https://doi.org/10.1080/10894160.2011.557641		Female	Lesbian
2012	TOTENHAGEN, C., BUTLER, E., & RIDLEY, C. (2012). Daily stress, closeness, and satisfaction in gay and lesbian couples. Personal Relationships, 19(2), 219–233.https://doi.org/10.1111/j.1475-6811.2011.01349.xx	average 32 years old (range=19 – 67,SD=11.2),	male, female	40 gay male couples and 55 lesbian couples		Caucasian (78.7%) andHispanic (11.7%)		at least some college (55.4%)				most indicated that their rela-tionships were serious (97.9%)
2012	Trail, T. E., Goff, P. A., Bradbury, T. N., & Karney, B. R. (2012). The Costs of Racism for Marriage: How Racial Discrimination Hurts, and Ethnic Identity Protects, Newlywed Marriages Among Latinos. Personality & Social Psychology Bulletin, 38(4), 454–465. https://doi.org/10.1177/0146167211429450	Husbands’ mean age was 27.3 (SD= 5.5) and wives’ mean age was 25.6 (SD= 5.0).	men, women	heterosexual		Latino. For husbands, 54% were born in the United States, 33% were born in Mexico, and 13% were born in other Latin or South American countries. For wives, 59% were born in the United States, 31% were born in Mexico, and 10% were born in other Latin or South American countries. Overall, 70% of respondents were of Mexican descent (either by birth or by their mother’s birthplace).				The wives had a mean income of $22,026 (SD= $21,432) and husbands had a mean income of $29,409 (SD= $19,822).	USA	Marriages averaged 4.9 months in duration.	couples had an average of .68 chil-dren (SD= 1.02)
2012	Young, M., & Schieman, S. (2012). When Hard Times Take a Toll: The Distressing Consequences of Economic Hardship and Life Events within the Family-Work Interface. Journal of Health and Social Behavior, 53(1), 84–98. https://doi.org/10.1177/0022146511419204	the average age of participants is 45 years	male, female	heterosexual				Most respondents report some postsecondary edu-cation,	Most are employed in professional or administra-tive occupations	The median household income of our sample is $62,500.		Sixty-four percent of the sample is married or cohabiting/common law,	Majority report atleast 1 child.
2013	Bluth, K., Roberson, P. N. E., Billen, R. M., & Sams, J. M. (2013). A Stress Model for Couples Parenting Children With Autism Spectrum Disorders and the Introduction of a Mindfulness Intervention. Journal of Family Theory & Review, 5(3), 194–213. https://doi.org/10.1111/jftr.12015
2013	Drabe, N., Wittmann, L., Zwahlen, D., Büchi, S., & Jenewein, J. (2013). Changes in close relationships between cancer patients and their partners. Psycho-Oncology (Chichester, England), 22(6), 1344–1352. https://doi.org/10.1002/pon.3144	Mean age was 58.5 years (SD = 12.8; range = 24–87) inpatients and 57.9 (SD = 21.8; range = 23–85) in partners.	female, male	heterosexual	cancer							Mean partnership duration was 28.3 years (SD = 14.6;range = 1–60).
2013	Fletcher, J. M., & Tefft, N. (2013). The Long-Term Effects of Stress on Partner Weight Characteristics. PloS One, 8(6), e66353–e66353.https://doi.org/10.1371/journal.pone.00663533	Participants ranged in age between 18–43									USA	500 pairs were married, 500pairs were cohabitating, and 500 pairs were dating
2013	Graham, J., & Barnow, Z. (2013). Stress and Social Support in Gay, Lesbian, and Heterosexual Couples: Direct Effects and Buffering Models. Journal of Family Psychology, 27(4), 569–578. https://doi.org/10.1037/a0033420	19 to 74 (M_x0001_34.7)	male, female	111 couples (25 gay, 41 lesbian,and 45 heterosexual)		A total of 12.2% of thecouples were of the same ethnicity and non-White, and 21.1% ofthe couples were interracial. The remaining couples were White						married or cohabitating
2013	Park, M., & Park, B. (2013). Influence of Acculturative Stress of Married Migrant Women on Marriage Satisfaction: The Mediating Effect of Problem-Solving Ability and Information Support. Asian Social Work and Policy Review, 7(1), 44–60. https://doi.org/10.1111/aswp.12007	<30 years 53.0% 30–39 years 36.8% >39 years 10.3%	female, male			China 38.4% Vietnam 37.1% Philippines 24.5%		Middle school 31.8% High school 34.8% Over college 33.1%		<1,000,000 won 10.3% 1,000,000–2,000,000 won 40.4% 2,000,000–3,000,000 won 30.8% >3,000,000 won 16.6%	S.Korea	Married	None 23.8% With children 70.2%
2013	Tanji, H., Koyama, S., Wada, M., Kawanami, T., Kurita, K., Tamiya, G., Saito, N., Suzuki, K., Kato, T., Anderson, K. E., Gruber-Baldini, A. L., Fishman, P. S., Reich, S. G., Weiner, W. J., & Shulman, L. M. (2013). Comparison of caregiver strain in Parkinson’s disease between Yamagata, Japan, and Maryland, The United States. Parkinsonism & Related Disorders, 19(6), 628–633. https://doi.org/10.1016…	Japan Mean(SD)=68.9 (9.4), USA Mead(SD)=63.7 (9.7)	female, male	heterosexual	Parkinsons	Japanese, American		Japan, greater than highschool: 17.9%, USA, greater than highschoo = 70.8%	Japan employed = 23.1%, USA employed = 39.4%		Japan, USA	Japan, mean years of marriage(SD) = 44.4 (10.6). USA, mean years of marriage = 39.1 (12.9)
2013	Wickrama, K. A. S., O’Neal, C. W., & Lorenz, F. O. (2013). Marital Functioning From Middle to Later Years: A Life Course-Stress Process Framework. Journal of Family Theory & Review, 5(1), 15–34. https://doi.org/10.1111/jftr.12000	Middle to later years	male, female	heterosexual
2013	Williamson, H. C., Karney, B. R., & Bradbury, T. N. (2013). Financial Strain and Stressful Events Predict Newlyweds’ Negative Communication Independent of Relationship Satisfaction. Journal of Family Psychology, 27(1), 65–75. https://doi.org/10.1037/a0031104	Men’s mean age was 27.9(SD_x0001_5.8), and women’s mean age was 26.3 (SD_x0001_5.0).	female, male	heterosexual		Twelve percent ofcouples were African American, 12% were Caucasian, and 76%were Hispanic				Wives had a mean income of $28,672 (SD_x0001_$24,549), and husbands hada mean income of $34,153 (SD_x0001_$27,094).	Los Angeles	Married, Marriages averaged 4.8 months in duration (SD_x0001_=2.5)	38.5% of couples had children
2014	Ain, Q. U., Dar, N. Z., Ahmad, A., Munzar, S., & Yousafzai, A. W. (2014). Caregiver stress in stroke survivor: data from a tertiary care hospital -a cross sectional survey. BMC Psychology, 2(1), 49–49. https://doi.org/10.1186/s40359-014-0049-9
2014	Chung, H., & Epstein, N. (2014). Perceived racial discrimination, acculturative stress, and psychological distress among Asian immigrants: The moderating effects of support and interpersonal strain from a partner. International Journal of Intercultural Relations, 42, 129–139. https://doi.org/10.1016/j.ijintrel.2014.04.003	The mean age of the total sample was 44.1(SD=12.8);the mean age of the females was 42.8(SD=12.1),and the mean age for the males was 45.5(SD=13.4).	female, male	heterosexual		Asian american					United States
2014	Cruz, R. A., Gonzales, N. A., Corona, M., King, K. M., Cauce, A. M., Robins, R. W., Widaman, K. F., & Conger, R. D. (2014). Cultural Dynamics and Marital Relationship Quality in Mexican-Origin Families. Journal of Family Psychology, 28(6), 844–854. https://doi.org/10.1037/a0038123	On average, husbands were 40-years-old (SD_x0002_6.12; range_x0002_28 to 65) and had 9 years of education(SD_x0002_3.75). Wives, on average, were 37-years-old (SD_x0002_5.80,range_x0002_27 to 57) and had 9 years of education (SD_x0002_3.75).	men, women	heterosexual		Mexican					Immigrant in USA from Mexico	married
2014	Doyle, D. M., & Molix, L. (2014). How does stigma spoil relationships? Evidence that perceived discrimination harms romantic relationship quality through impaired self-image. Journal of Applied Social Psychology, 44(9), 600–610. https://doi.org/10.1111/jasp.12252	The mean ageof the sample was 43.56 (standard deviation [SD]=12.59)	male, female			currently residents of the UnitedStates and identified as Puerto Rican (35.9%), Mexican(27.9%), Dominican (19.4%), and African American(16.8%).					United States	The mean relationship length was 238.32 months(SD=239.48).
2014	Frost, D. M. (2014). Redemptive Framings of Minority Stress and Their Association With Closeness in Same-Sex Relationships. Journal of Couple & Relationship Therapy, 13(3), 219–239. https://doi.org/10.1080/15332691.2013.871616	On average, participants were34.38 years old (SD=9.53) and their relationships were on average 6.86(SD=5.00) years in length.	The sample contained approximately equal representa-tion of women (n=51) and men (n=48).	lesbian, bisexual		Approximately one quarter ofparticipants identified as racial/ethnic minorities (n=24), with most identi-fying as Black/African-American (n=11) followed by Asian (n=6).		Most participants had at least some college-level education (n=91) and were em-ployed full-time (n=60).			Participants resided in 36 states within the UnitedStates.
2014	Gamarel, K., Reisner, S., Laurenceau, J., Nemoto, T., & Operario, D. (2014). Gender Minority Stress, Mental Health, and Relationship Quality: A Dyadic Investigation of Transgender Women and Their Cisgender Male Partners. Journal of Family Psychology, 28(4), 437–447. https://doi.org/10.1037/a0037171		transgender women and their cisgender primary male partner			The majority of the sample (79.1%) self-identifiedas a member of a racial/ethnic minority group (27.4% Black;18.7% Latino; 12.6% Asian; and 19.4% Mixed/Other).				half of the sample reported financial hardship—earning less than$500 a month (61.3%)	San Francisco Bay Area
2014	Lewis, R., Milletich, R., Derlega, V., & Padilla, M. (2014). Sexual Minority Stressors and Psychological Aggression in Lesbian Women’s Intimate Relationships: The Mediating Roles of Rumination and Relationship Satisfaction. Psychology of Women Quarterly, 38(4), 535–550. https://doi.org/10.1177/0361684313517866	Range 22–88	Female	Lesbian		95% Caucasian		Majority have some college or above		Ranging from <50,000 to greater than 200,000	United States	Majority are married or in a committed relationship.
2014	Li, P.-F., & Wickrama, K. A. S. (2014). Stressful Life Events, Marital Satisfaction, and Marital Management Skills of Taiwanese Couples. Family Relations, 63(2), 193–205. https://doi.org/10.1111/fare.12066	Husbands’ age ranged from 25 to 73 (M=43.75,SD=9.57) and wives’ age rangedfrom 20 to 65 (M=41.30,SD=9.10).	male,female	heterosexual				37.2% of the males and 42.2% of thefemales had completed high school; 20.2% ofthe males and 25.5% of the females had obtaineda bachelor’s degree; 42.5% of the males and32.3% of the females had earned a postgraduatedegree.	Most of the women (75.9%) and men(93.2%) were employed. less than $20,000 (48.4% of the males,79.2% of the females); $20,001 to $40,000(43.6% of the males, 19.7% of the females); and$40,001 or more (8.1% of the males, 1.1% ofthe females).		Taiwan	Legally married, The couples hadbeen married for an average of 14.67 years (SD=10.27). In this sample, 98.7% of the males and97.3% of the females were married for the firsttime.	average of 1.77 children (SD=1.06)
2014	McNeil, S. N., Fincham, F. D., & Beach, S. R. H. (2014). Does Spousal Support Moderate the Association Between Perceived Racial Discrimination and Depressive Symptoms among African American Couples? Family Process, 53(1), 109–119. https://doi.org/10.1111/famp.12054		men, women	heterosexual						couple earned on average $40,000–$50,000 a year in household income	USA	Couples in this study were married an average of 9.75 years (SD=9.26)
2014	Mink, M. D., Lindley, L. L., & Weinstein, A. A. (2014). Stress, Stigma, and Sexual Minority Status: The Intersectional Ecology Model of LGBTQ Health. Journal of Gay & Lesbian Social Services, 26(4), 502–521. https://doi.org/10.1080/10538720.2014.953660			Sexual Minority
2014	Reisner, S., Gamarel, K., Nemoto, T., & Operario, D. (2014). Dyadic Effects of Gender Minority Stressors in Substance Use Behaviors Among Transgender Women and Their Non-Transgender Male Partners. Psychology of Sexual Orientation and Gender Diversity, 1(1), 63–71. https://doi.org/10.1037/0000013		191 couples (N_x0001_382 individuals) comprisedof transgender women and their non-transgender primary malepartner.	heterosexual
2014	Ryan, L. H., Wan, W. H., & Smith, J. (2014). Spousal social support and strain: impacts on health in older couples. Journal of Behavioral Medicine, 37(6), 1108–1117.https://doi.org/10.1007/s10865-014-9561-xx	average age of 67.17 years (SD=9.0; range 50–97)	female, male	heterosexual		91% Caucasian		average 13 years of education (SD=2.0; range 0–17).			USA	Couples were on averagemarried for 38.63 years (SD=14.8; range 0.1–70.5).
2015	Burke, J. (2015). Investigating Psychological Distress in Latino Romantic Relationships. Race, Gender & Class (Towson, Md.), 22(3-4), 172–194.					Latino, Asian american
2015	Dionisi, A., & Barling, J. (2015). Spillover and crossover of sex-based harassment from work to home: Supervisor gender harassment affects romantic relationship functioning via targets’ anger. Journal of Organizational Behavior, 36(2), 196–215. https://doi.org/10.1002/job.1969	Mean age - 39	317 females and 71 of their romantic partners	96% heterosexual		73% Caucasian
2015	Dispenza, F. (2015). An Exploratory Model of Proximal Minority Stress and the Work-Life Interface for Men in Same-Sex, Dual-Earner Relationships. Journal of Counseling and Development, 93(3), 321–332. https://doi.org/10.1002/jcad.12030	The mean age of participants was 38.72 years (SD = 10.72).	202 men	Approximately 93.6% of the participants exclusively iden-tified as gay, 4.0% identified as bisexual, and 2.4% identified as queer.		78.2% White/European American, 9.9% Black/African American, 5.4% Latino/Hispanic de-scent, 2.5% multiracial/biracial, 2.0% Asian American/Pacific Islander, 1.0% Native American, and 1.0% other.		1.5% of the sample had some high school experience but no diploma, 5.0% had a high school diploma, 2.5% had a high school equivalency with some vocational or trade training, 17.3% had some college education but no degree, 42.1% possessed an associate’s or baccalaureate degree, 28.6% had a graduate de-gree (i.e., master’s or doctorate), and 3.0% had a professional degree (e.g., a doctor of medicin…	Employed	median income rang-ing from $30,000 to $40,000.	45.0% reporting living in the Southeast, 30.7% living in the Northeast, 12.9% living in the Southwest, and 11.4% living on the West Coast.	22.1% of participants reported being in the relationship for 12 months, 24.1% re-ported being in the relationship for 1 to 2 years, 28.7% from 3 to 7 years, 16.6% from 8 to 15 years, 3.5% from 16 to 20 years, and 5.0% for more than 21 years.
2015	Doyle, D., & Molix, L. (2015). Social Stigma and Sexual Minorities’ Romantic Relationship Functioning: A Meta-Analytic Review. Personality & Social Psychology Bulletin, 41(10), 1363–1381. https://doi.org/10.1177/0146167215594592
2015	Falconier, M. K. (2015). TOGETHER - A Couples’ Program to Improve Communication, Coping, and Financial Management Skills: Development and Initial Pilot-Testing. Journal of Marital and Family Therapy, 41(2), 236–250. https://doi.org/10.1111/jmft.12052
2015	Greene, D. C., & Britton, P. J. (2015). Predicting Relationship Commitment in Gay Men: Contributions of Vicarious Shame and Internalized Homophobia to the Investment Model. Psychology of Men & Masculinity, 16(1), 78–87. https://doi.org/10.1037/a0034988	Ages ranged from 18 to 66 or older, with approxi-mately 4% 18–24 year, 14% 25–31 years, 21% 32–38 years, 12%39–44 years, 17% 45–51 years, 17% 52–58 years, 11% 59–65years, and 5% 66 or older.	men	gay, bisexual		Approximately 74% of the total sampleself-identified as non-Hispanic White, 9% as Latino or Hispanic,9% as Asian American, 5% as African American or Black, 2% asAmerican Indian or Native American, and 1% as Hawaiian orOther Pacific Islander.		approximately 52% had anadvanced degree, 29% were college graduates, 14% had somecollege, and 4% had terminal high school diplomas or its equiva-lent, and less than 1% had less than a high school education.			Economically, thesample was at the higher end of the continuum, with 31% earning$100,000 or more, 31% earning $50,000–$100,000 annually, 12%earned $30,000–$39,000, 12% earned $40,000–$49,000 annually,7% earned $20,000–$29,000, 4% earned less than $10,000 annu-ally, and 3% earned $10,000–$19,000.	66% in committed and cohabiting relationships, 15% in state-defined domestic partnerships, and 19% legally married.	Themajority of the sample did not have children living in their house-holds; however, of the 10% who did, 7% reported having onechild, 2% reported having three children in their households, and1% reported two children living with them.
2015	LeBlanc, A., Frost, D., & Wight, R. (2015). Minority Stress and Stress Proliferation Among Same-Sex and Other Marginalized Couples. Journal of Marriage and Family, 77(1), 40–59. https://doi.org/10.1111/jomf.12160			same-sex
2015	Li, Q., Xu, Y., Zhou, H., & Loke, A. Y. (2015). Testing a Preliminary Live with Love Conceptual Framework for cancer couple dyads: A mixed-methods study. European Journal of Oncology Nursing : the Official Journal of European Oncology Nursing Society, 19(6), 619–628. https://doi.org/10.1016/j.ejon.2015.03.010	Patient Mean = 57.7 (ranging from 26 to 79, SD=11.4)	Male: 78; Female: 39	heterosexual	Cancer	Chinese		Primary school or less (50.4%), High school (37.6%), University or above (12.0%)			China	Duration of marriage = 31.8 (ranging from 4 to 52, SD=10.9)
2015	Manne, S. L., Siegel, S., Heckman, C. J., & Kashy, D. A. (2015). Psychological distress as a mediator of the association between disease severity and occupational functioning among employed spouses of women recently diagnosed with breast cancer. Psycho-Oncology (Chichester, England), 24(11), 1560–1568. https://doi.org/10.1002/pon.3767	Mean(SD) = 56.2 (8.9)	female, male	heterosexual	breast cancer	81.8% White, 15.4% Non-white, Rest - infor was missing		Majority had some college or higher.		Median family income = $100,000		95.6% were married, rest were cohabitating.
2015	Singh, M. D., & Bhayana, R. M. (2015). Straddling Three Worlds: Stress, Culture and Adaptation in South Asian Couples. Contemporary Family Therapy, 37(1), 45–57. https://doi.org/10.1007/s10591-014-9319-1	Coupl1(33,29), Couple2(32,29), Couple 3(41,26), Couple 4(37,34)	male, female	heterosexual		South Asian	varied	College degree or above	Employed, home-maker or student		USA	married	2 couple had 2 kids each, 2 other couple did not have any children.
2015	Spiegler, O., Leyendecker, B., & Kohl, K. (2015). Acculturation Gaps Between Turkish Immigrant Marriage Partners: Resource or Source of Distress? Journal of Cross-Cultural Psychology, 46(5), 667–683. https://doi.org/10.1177/0022022115578686	Wives’ average age was 36 years (SD = 6, range = 24-56 years); husbands’ average age was 39 years (SD = 5, range = 27-57 years).	men, women	heterosexual		Turkish		Fifty-nine percent of the wives and 39% of the husbands had less than 10 years of school	Twenty-five percent of the wives and 64% of the husbands were gainfully employed. The average net monthly equivalized household income according to the OECD scale (Hagenaars, de Vos, & Zaidi, 1994) was 922.63 Euros ranging from 264.83 to 2,714.93 Euros. The average household income among Germans is 1.800 Euros per month (DeStatis–Statistisches Bundesamt, 2014).	low socioeconomic status	First or second generation immigrants in Germany.	married	Ninety-seven percent of the families had more than one child and up to nine children. These children ranged in age from 1 to 31 years.
2015	Traa, M. J., Braeken, J., De Vries, J., Roukema, J. A., Slooter, G. D., Crolla, R. M. P. H., Borremans, M. P. M., & Den Oudsten, B. L. (2015). Sexual, marital, and general life functioning in couples coping with colorectal cancer: a dyadic study across time. Psycho-Oncology (Chichester, England), 24(9), 1181–1188. https://doi.org/10.1002/pon.3801	The mean age of patients was 62.0±8.6 andthat of partners 60.6±9.9.	female, male	heterosexual	Colorectal cancer							Married
2015	Traa, M. J., De Vries, J., Bodenmann, G., & Den Oudsten, B. L. (2015). Dyadic coping and relationship functioning in couples coping with cancer: A systematic review. British Journal of Health Psychology, 20(1), 85–114. https://doi.org/10.1111/bjhp.12094
2015	Umberson, D., Thomeer, M. B., & Lodge, A. C. (2015). Intimacy and Emotion Work in Lesbian, Gay, and Heterosexual Relationships. Journal of Marriage and Family, 77(2), 542–556. https://doi.org/10.1111/jomf.12178
2015	Umberson, D., Thomeer, M. B., Kroeger, R. A., Lodge, A. C., & Xu, M. (2015). Challenges and Opportunities for Research on Same-Sex Relationships. Journal of Marriage and Family, 77(1), 96–111. https://doi.org/10.1111/jomf.12155
2015	Van Der Merwe, E., & Greeff, A. P. (2015). Infertility-Related Stress within the Marital Relationship. International Journal of Sexual Health, 27(4), 522–532.https://doi.org/10.1080/19317611.2015.10672755
2015	Williams, D., Cheadle, J., & Goosby, B. (2015). Hard Times and Heart Break: Linking Economic Hardship and Relationship Distress. Journal of Family Issues, 36(7), 924–950. https://doi.org/10.1177/0192513X13501666		female, male	heterosexual						economic hardship	USA	married or cohabitating	parents
2015	Wycisk, J. (2015). The Minority Stress of Lesbian, Gay and Bisexual Parents. Specificity of Polish Context. Polish Psychological Bulletin, 46(4), 594–606.https://doi.org/10.1515/ppb-2015-00666
2016	Copp, J. E., Giordano, P. C., Manning, W. D., & Longmore, M. A. (2016). Couple-Level Economic and Career Concerns and Intimate Partner Violence in Young Adulthood. Journal of Marriage and Family, 78(3), 744–758. https://doi.org/10.1111/jomf.12282
2016	Dalteg, T., Benzein, E., Sandgren, A., Malm, D., & Årestedt, K. (2016). Associations of Emotional Distress and Perceived Health in Persons With Atrial Fibrillation and Their Partners Using the Actor–Partner Interdependence Model. Journal of Family Nursing, 22(3), 368–391. https://doi.org/10.1177/1074840716656815	Patient Mean = 66.0 (9.0), range = 38-82	male, female	heterosexual	Atrial Fibrillation	Not mentioned		≤9 years in school - 43%, High school or equivalent - 26%, College/university - 27%, Unknown - 3%	Employed - 34%, Retired - 58%, Unemployed/sick leave - 3%, Unknown - 4%			married 98% or cohabitating
2016	Frost, D. M., & Fingerhut, A. W. (2016). Daily exposure to negative campaign messages decreases same-sex couples’ psychological and relational well-being. Group Processes & Intergroup Relations, 19(4), 477–492. https://doi.org/10.1177/1368430216642028	On average, par-ticipants were 33.77 years old (SD = 8.28).	The majority of the couples were female (n = 50)	Majority identified as either gay or lesbian (n = 122).		the majority of partici-pants were White (n = 108)					four states (Maine, Maryland, Minnesota, and Washington)	On average, couples reported being together for M = 6.8 years (SD = 4.2). Most couples (n = 51) were living together, and a minority had obtained legal marriage in another U.S. state (n = 16).
2016	Halpern-Meekin, S., & Turney, K. (2016). Relationship Churning and Parenting Stress Among Mothers and Fathers. Journal of Marriage and Family, 78(3), 715–729. https://doi.org/10.1111/jomf.12297		male, female	heterosexual		Majority were non White		most were soem college or less				varied	parents
2016	Hammett, J., Castañeda, D., & Ulloa, E. (2016). Predicting Mental Health Based on Partners’ Marital Distress: A Latent Profile Analysis. The Family Journal (Alexandria, Va.), 24(3), 205–215. https://doi.org/10.1177/1066480716648685	men ranged in age from 18 to 62 years (M¼29.04,SD¼8.10) and women ranged in age from 19 to 60years (M¼27.96,SD¼8.35)	female, male	heterosexual		Caucasian, Mexican- American						Newly wed
2016	Kim, C., & Sung, H. E. (2016). The Effects of Acculturation on Intimate Partner Violence Among Chinese Immigrants in New York City. Journal of Family Violence, 31(3), 325–336. https://doi.org/10.1007/s10896-015-9761-3	The mean age of abusers in this study was 48, and rangedfrom 20 to 94 years old. The mean age of victims was 44 andranged between 20 and 79.	male, female	heterosexual		Chinese					New York City	Over 65 % of victims and offenders were married to eachother. Among the victims married to offenders, the meanlength of marriage was 12 years, but ranging from less than1 month to 52 years.
2016	Kung, W. W. (2016). Culture- and Immigration-Related Stress Faced by Chinese American Families with a Patient Having Schizophrenia. Journal of Marital and Family Therapy, 42(3), 409–422. https://doi.org/10.1111/jmft.12145
2016	Manning, W. D., Brown, S. L., & Stykes, J. B. (2016). Same-Sex and Different-Sex Cohabiting Couple Relationship Stability. Demography, 53(4), 937–953.https://doi.org/10.1007/s13524-016-0490-xx	broad age range (16–87 years old)	female, male	same - sex, different-sex		Predominantly White		On average same-sex couples had more education		On average same sex couples had higher income			Different sex couples more likely to have children.
2016	Manning, W. D., Brown, S. L., & Stykes, J. B. (2016). Same-Sex and Different-Sex Cohabiting Couple Relationship Stability. Demography, 53(4), 937–953.https://doi.org/10.1007/s13524-016-0490-xx	Respondents in same-sex couples had, on average, slightly older partners (age 41) thandifferent-sex cohabiting (age 31) and married (age 33) couples.	male, female	same-sex, different-sex		The racial compositionof same-sex couples was less diverse than different-sex couples. Nearly three-quarters (72 %) of same-sex couples were both white, in contrast to 59 % of different-sex cohabiting and 63 % of married couples.		Same-sex cohabiting couples had much higher average levels of educational attainment thandifferent-sex couples. Whereas both individuals had at least a college degreein 42 % of same-sex couples, this was true for just 10 % of different-sexcohabiting couples and 23 % of married couples.		Same-sex couples reported asignificantly higher median household income their first month in the surveycompared with their different-sex cohabiting counterparts	USA	Married, cohabitating	Same-sex couplesless often had children in their home (23 %) than different-sex cohabitingcouples (44 %) and married couples (54 %).
2016	Martin, S. C. (2016). Relational Issues Within Couples Coping With Parkinson’s Disease: Implications and Ideas for Family-Focused Care. Journal of Family Nursing, 22(2), 224–251. https://doi.org/10.1177/1074840716640605	PWPs(patient with Parkinson's) had an average age of 68 (with a range of 41 to 89 years old) and had been diag-nosed with PD an average of 6 years ago (ranging from less than 1 year to 26 years ago).	PWPs - (62%) were men and 8 (38%) were women	heterosexual	Parkinson's disease	95% indicated their racial/ethnic identity to be White. Two participants (one PWP and one partner) identified as African American.					USA	All participants were married, with the exception of one dyad (who identified as cohabiting, unmarried partners). Participants reported having been in a relationship with their partner for an average of 38 years (range 3 to 64 years)
2016	Mason, T., Lewis, R., Gargurevich, M., & Kelley, M. (2016). Minority Stress and Intimate Partner Violence Perpetration Among Lesbians: Negative Affect, Hazardous Drinking, and Intrusiveness as Mediators. Psychology of Sexual Orientation and Gender Diversity, 3(2), 236–246. https://doi.org/10.1037/sgd0000165	18 to 35	female	lebian		Mostly Caucasian					USA
2016	Rodriguez, Y., Helms, H. M., Supple, A. J., & Hengstebeck, N. D. (2016). Mexican Immigrant Wives’ Acculturative Stress and Spouses’ Marital Quality: The Role of Wives’ Marriage Work With Husbands and Close Friends. Journal of Family Issues, 37(12), 1678–1702. https://doi.org/10.1177/0192513X14561519	28 to 30 years old	male, female	heterosexual		Mexican origin		Wives and husbands averaged 10 and 9 years of formal schooling, respectively.	Ninety-eight percent of husbands were employed and 54% of wives were employed	amily income averaged $33,297.	North carolina	spouses had to be legally married or “living as married” in consensual unions,	Couples averaged two children with firstborn children averaging 6 years old.
2017	Barrantes, R., Eaton, A., Veldhuis, C., & Hughes, T. (2017). The Role of Minority Stressors in Lesbian Relationship Commitment and Persistence Over Time. Psychology of Sexual Orientation and Gender Diversity, 4(2), 205–217. https://doi.org/10.1037/sgd0000221	18 to 82	female	lesbian, bisexual		Fifty-sixpercent of the sample self-identified as White, 20% as Black orAfrican American, 12% as Hispanic or Latina, 3% as Asian orPacific Islander, 0.5% as American Indian, and 9% as “Otherracial/ethnic group
2017	Burri, A., Gebre, M. B., & Bodenmann, G. (2017). Individual and dyadic coping in chronic pain patients. Journal of Pain Research, 10, 535–544.https://doi.org/10.2147/JPR.S1288711	aged between 27 and 71 years (M = 51.8, SD = 10.8)	male, female					Primary school 20.9%, Secondary school 7%, Apprenticeship 51.2%, Gymnasium/college 14%, University 7%	0 - 53.5%, 10 - 2.3 %, 30−40: 4.7%, 50-60: 16.3%, 70−80: 9.3, 90−100: 14.0%		Switzerland	The average relationship duration was 24.2 years (SD = 12.8; range: 3–48), and 35 patients were married.	48.8% had children
2017	Cao, H., Zhou, N., Fine, M., Liang, Y., Li, J., & Mills‐Koonce, W. R. (2017). Sexual Minority Stress and Same‐Sex Relationship Well‐being: A Meta‐analysis of Research Prior to the U.S. Nationwide Legalization of Same‐Sex Marriage. Journal of Marriage and Family, 79(5), 1258–1277. https://doi.org/10.1111/jomf.12415	participants were middle aged (mean=36.93 years old,SD=5.71, min=22.70, max=54.00)	varied	varied		Predominantly White		predominantly highly educated		Predominantly middle class	urban areas of the united states	relationships with relativelylong length (mean=6.63 years long,SD=3.38,min=2.50, max=16.10).	varied
2017	Frost, D. M. (2017). The Benefits and Challenges of Health Disparities and Social Stress Frameworks for Research on Sexual and Gender Minority Health. Journal of Social Issues, 73(3), 462–476. https://doi.org/10.1111/josi.12226
2017	Jamison, T. B., Ganong, L., & Proulx, C. M. (2017). Unmarried Coparenting in the Context of Poverty: Understanding the Relationship Between Stress, Family Resource Management, and Resilience. Journal of Family and Economic Issues, 38(3), 439–452. https://doi.org/10.1007/s10834-016-9518-z	Participants ranged in age from 19 to 47 (m = 25.5 years)	male, female	heterosexual		about half were White (n= 14), seven were African Ameri-can, and one was Asian/Pacific Islander.		Most parents had a high school diploma/GED (n= 15) or some college (n = 6).					Most were first-time parents (n= 12), and 10 of the 11 couples were copar-enting (or expecting) their first child together. Two women were pregnant at the time of their interviews, but were rais-ing other children with their partners.
2017	Longobardi, C., & Badenes-Ribera, L. (2017). Intimate Partner Violence in Same-Sex Relationships and The Role of Sexual Minority Stressors: A Systematic Review of the Past 10 Years. Journal of Child and Family Studies, 26(8), 2039–2049. https://doi.org/10.1007/s10826-017-0734-4			same-sex
2017	Longobardi, C., & Badenes-Ribera, L. (2017). Intimate Partner Violence in Same-Sex Relationships and The Role of Sexual Minority Stressors: A Systematic Review of the Past 10 Years. Journal of Child and Family Studies, 26(8), 2039–2049. https://doi.org/10.1007/s10826-017-0734-4	Participants’ages ranged between 18 and 88 years, with a mean age ofabout 33 years		all those surveyed identified themselves as being ina relationship with a same-sex partner at the time of thestudy, or having been in a relationship with a same-sexpartner in the year that preceded the study.		Most respondents identified themselves as Caucasian, with varying percentages of other racial and ethnic groups.		mostrespondents had received at least some college education.
2017	Novak, J. R., Anderson, J. R., Johnson, M. D., Walker, A., Wilcox, A., Lewis, V. L., & Robbins, D. C. (2017). Associations Between Economic Pressure and Diabetes Efficacy in Couples with Type 2 Diabetes. Family Relations, 66(2), 273–286. https://doi.org/10.1111/fare.12246	Patients ranged in age from 29 to 72 years(M=57.4,SD=9.8) and spouses ranged inage from 29 to 73 years (M=57.4,SD=10.2	57.3% of diabeticpatients were male and 42.7% were female	heterosexual		The majority ofrespondents reported being European Amer-ican (patients=87% and spouses=83.3%),7% of patients and 5.3% of spouses wereAfrican American, 3.5% of patients and 4.4% ofspouses were Latino/a, and the remaining 2.6%of patients and 7% of spouses were anotherrace not listed.		0.9% of patients and no spouses had less thana high school diploma, 12.1% of patients and19.1% of spouses were high school graduates,43.1% of patients and 31.3% of spouses hadcompleted some college or had an associate’sdegree or technical training, 21.6% of patientsand 28.7% of spouses held a bachelor’s degree,and 22.4% of patients and 20.9% of spouseshad a postgraduate degree.		18.5% of couplesmade less than $50,000 a year, 24.1% madebetween $50,000 and $69,999 annually, 31.5%earned between $70,000 and $99,999 per year,and 25.9% had a household income of $100,000or more per year.	Midwest	The relationships had lasted amean of 29.4 years (SD=13.9); 61.5% of thecouples were in their first marriage, 27.4%in their second, and 11.1% had been marriedthree or more times.
2017	Pantalone, D. W., Valentine, S. E., Jackson, M. A., Andrasik, M. P., & Simoni, J. M. (2017). Partner Abuse Among HIV-Positive Sexual Minority Men: “That Was All I Deserved . . .” Qualitative Health Research, 27(11), 1713–1724. https://doi.org/10.1177/1049732317699179		cisgender men	gay/bisexual men							Seattle, Washington	dating
2017	Randall, A., Tao, C., Totenhagen, C., Walsh, K., & Cooper, A. (2017). Associations Between Sexual Orientation Discrimination and Depression Among Same-Sex Couples: Moderating Effects of Dyadic Coping. Journal of Couple & Relationship Therapy, 16(4), 325–345. https://doi.org/10.1080/15332691.2016.1253520
2017	Riggle, E. D. B., Wickham, R. E., Rostosky, S. S., Rothblum, E. D., & Balsam, K. F. (2017). Impact of Civil Marriage Recognition for Long-Term Same-Sex Couples. Sexuality Research & Social Policy, 14(2), 223–232. https://doi.org/10.1007/s13178-016-0243-z	The average age of participants was 55.6 years (SD =8.50).	male, female	same - sex couples		Participants self-reported theirracial/ethnic identity as (participants could choose more thanone identity option): 96.1 % White, 3.9 %BOther,^2.0 %American Indian/Alaskan Native, 1.2 % Latino/a/Hispanic, 0.6 % African-American/Black, and 0.3 % Native Hawaiian/Pacific Islander.		1.4 % High School diploma, 14.3 % some college or associ-ate’s degree, 27 % bachelor’s degree, 56 % masters, profes-sional or doctoral degree.			Participants resided in 12 US statesand the District of Columbia that recognized marriages ofsame-sex couples and 17 states that did not recognize mar-riages of same-sex couples at the time of the study. The mostcommon states of residence were Massachusetts (n=59),California (n= 48), Vermont (n=39),andNewYork(n=36)	Self-reported average length of relationship was22.78 years (SD = 7.91
2017	Rogers, A. H., Seager, I., Haines, N., Hahn, H., Aldao, A., & Ahn, W.-Y. (2017). The indirect effect of emotion regulation on minority stress and problematic substance use in lesbian, gay, and bisexual individuals. Frontiers in Psychology, 8, 1881–1881. https://doi.org/10.3389/fpsyg.2017.01881	LG mean(sd) = 30.63(13.26), Bi mean(sd) = 25.45(8.98)	female	LGB		Above 80% white		Majority had some college or higher.
2017	Rostosky, S. S., & Riggle, E. D. . (2017). Same-sex relationships and minority stress. Current Opinion in Psychology, 13, 29–38.https://doi.org/10.1016/j.copsyc.2016.04.0111			same-sex
2017	Schellekens, M. P. ., Karremans, J. C. T. ., ft, M. A. van der, Molema, J., Hurk, D. G. M. van den, Prins, J. ., & Speckens, A. E. . (2017). Are mindfulness and self-compassion related to psychological distress and communication in couples facing lung cancer? A dyadic approach. Mindfulness, 8(2), 325–336. https://doi.org/10.1007/s12671-016-0602-0	Mean(SD): Patient - 62.8 (8.2), Spouse - 61.6 (8.4)	male, female	heterosexual, 1 same-sex couple	lung cancer			Diverse				Mostly maried(>90%) or living together
2017	Zemp, M., Nussbeck, F. W., Cummings, E. M., & Bodenmann, G. (2017). The Spillover of Child-Related Stress into Parents’ Relationship Mediated by Couple Communication. Family Relations, 66(2), 317–331. https://doi.org/10.1111/fare.12244
2018	Amodeo, A. L., Esposito, C., Bochicchio, V., Valerio, P., Vitelli, R., Bacchini, D., & Scandurra, C. (2018). Parenting desire and minority stress in lesbians and gay men: A mediation framework. International Journal of Environmental Research and Public Health, 15(10), 2318–. https://doi.org/10.3390/ijerph15102318	The total sample ranged in age from 18 to 50 years (lesbians, M = 28.25,SD = 6.14; gay men, M = 33.11, SD = 9.64	male, female	lesbian, gay				60% had some college or higher			ived in Italy for at least 10 years	59.3% had a stable partner.
2018	Barton, A. W., Beach, S. R. H., Bryant, C. M., Lavner, J. A., & Brody, G. H. (2018). Stress Spillover, African Americans’ Couple and Health Outcomes, and the Stress-Buffering Effect of Family-Centered Prevention. Journal of Family Psychology, 32(2), 186–196. https://doi.org/10.1037/fam0000376	Men’s mean age was 39.89 years (SD_x0002_9.62; range: 21–83) andwomen’s mean age was 36.51 (SD_x0002_7.44; range: 23–73).				African American		Men’s median education level was high school or graduate equivalencydiploma (ranging from_x0003_Grade 9 to a doctorate or professionaldegree) and women’s median education level was some college ortrade school (ranging from_x0003_Grade 9 to a master’s degree).	The majority of men (76% [66% full-time]) and women (60% [46%full-time]) reported full- or part-time employment.	Median monthlypretax income was $1,400 (range $1–$7,500) for men and $1,200(range $1–$10,000) for women. The incomes of 53% of the familieswere below 100% of the poverty line, and incomes of 69% of thefamilies were below 150% of the poverty line.		63% were married; the mean length of marriage was 9.97 years(range: 0–56 years). Unmarried couples had been living togetherfor an average of 6.73 years (range: 0.25–23). Approximately 25% of the men and 19% of the women had been previously married.	The number of chil-dren residing in the home ranged from 1 to 8, with a mean of 2.96
2018	Boehmer, U., Stokes, J. E., Bazzi, A. R., Winter, M., & Clark, M. A. (2018). Dyadic stress of breast cancer survivors and their caregivers: Are there differences by sexual orientation? Psycho-Oncology (Chichester, England), 27(10), 2389–2397. https://doi.org/10.1002/pon.4836	heterosexual mean(SD) = 60.8 (8.4), sexual minority mean(SD)56.3 (8.6)	Female	heterosexual, sexual minority		Majority White		Majority had some college or higher.	heterosexual = 55.8% were employed, sexual minority = 68.5% were employed	Individual income: heterosexual: Less than $30 K - 20%, $30 K‐<$70 K - 35%, $70 K or more - 45%. sexual minority: Less than $30 K - 22.3%, $30 K‐<$70 K - 37.2%, $70 K or more - 40.5%		Majority had a partner or spouse.
2018	Hou, Y., Neff, L. A., & Kim, S. Y. (2018). Language Acculturation, Acculturation‐Related Stress, and Marital Quality in Chinese American Couples. Journal of Marriage and Family, 80(2), 555–568. https://doi.org/10.1111/jomf.12447	On average, husbands were48 years old (standard deviation [SD]=6.	male, female	heterosexual		Mostof the participating families hailed from HongKong or southern provinces of China; fewerthan 10 families originated from Taiwan.		Median and averageparental education level was a high schooldegree.	The majority of husbands (84%) andwives (77%) were employed at least part-time. Their occupations ranged fromunskilled laborers (e.g., construction workeror janitor) to professionals (e.g., banker orcomputer programmer).	Median and average family income wasbetween $30,001 and $45,000
2018	Lavi, I., Fladeboe, K., King, K., Kawamura, J., Friedman, D., Compas, B., Breiger, D., Gurtovenko, K., Lengua, L., & Katz, L. F. (2018). Stress and marital adjustment in families of children with cancer. Psycho-Oncology (Chichester, England), 27(4), 1244–1250. https://doi.org/10.1002/pon.4661	Average age of primarycaregiver was 36.02 years (SD= 7.74).	male, female	heterosexual						Incomes of $40,000or less, between $40,000 and $80,000, and over $80,000 werereported by 32.5%, 26.2%, and 41.3% of the sample, respectively		Caregivers were either married(90.8%) or romantically involved but not married (9.2%). Among mar-ried couples, average length of marriage was 10.15 years (SD= 6.0).	On average, families had 2.4 children (SD= .91).
2018	LeBlanc, A. J., Frost, D. M., & Bowen, K. (2018). Legal Marriage, Unequal Recognition, and Mental Health Among Same‐Sex Couples. Journal of Marriage and Family, 80(2), 397–408. https://doi.org/10.1111/jomf.12460
2018	Lee, E., & Roberts, L. J. (2018). Between Individual and Family Coping: A Decade of Theory and Research on Couples Coping With Health‐Related Stress. Journal of Family Theory & Review, 10(1), 141–165. https://doi.org/10.1111/jftr.12252
2018	Li, Q., Lin, Y., Xu, Y., & Zhou, H. (2018). The impact of depression and anxiety on quality of life in Chinese cancer patient-family caregiver dyads, a cross-sectional study. Health and Quality of Life Outcomes, 16(1), 230–230. https://doi.org/10.1186/s12955-018-1051-3	Adult with cancer - 54.6 ± 12.9 (ranging from 18–88), Adult caregiver - 46.6 ± 13.2 (ranging from 18 to 79	female, male	heterosexual	Cancer	Chinsese		Adult with cancer: Primary school or less 55.5%, High school 30.9%, University or above - 13.3%	Adult with cancer: 58.2% working, Caregiver - 64.1% working			Married - 91.4%
2018	Monk, J. K., Ogolsky, B. G., & Oswald, R. F. (2018). Coming Out and Getting Back In: Relationship Cycling and Distress in Same‐ and Different‐Sex Relationships. Family Relations, 67(4), 523–538. https://doi.org/10.1111/fare.12336		Approximately 63.2% ofindividuals in different-sex relationships indi-cated that their sex assigned at birth was female(36.8% male), whereas 53.4% of individualsin same-sex relationships reported their birthsex was female (46.6% male). Four individ-uals in different-sex relationships reported a current Trans* or other nonbinary identity, asdid 11 individuals in same-sex relationships.	545 individuals in same-sex(n=279) and different-sex (n=266) relation-ships were surveyed.		Majority White
2018	Monk, J. K., Ogolsky, B. G., & Oswald, R. F. (2018). Coming Out and Getting Back In: Relationship Cycling and Distress in Same‐ and Different‐Sex Relationships. Family Relations, 67(4), 523–538. https://doi.org/10.1111/fare.12336	Mean age for same -sex, different sex was in 30s.	Approximately 63.2% ofindividuals in different-sex relationships indi-cated that their sex assigned at birth was female(36.8% male), whereas 53.4% of individualsin same-sex relationships reported their birthsex was female (46.6% male). Four individ-uals in different-sex relationships reported a current Trans* or other nonbinary identity, asdid 11 individuals in same-sex relationships.	same-sex, different-sex		Individuals in different-sex relationships reported being White higher than those in same-sex relationships.		Majority of participants had some college or higher.		Income for male-female, male-male = $40,000–$49,000. Income for female-female = $30,000–$39,000	USA	Individuals indifferent-sex relationships reported being intheir relationships longer than those in same-sexrelationships. Those in different sex relationships reported being married more than those in same-sex relationships.	those indifferent-sex relationships more likely to reporthaving children than the other groups,
2018	Rusu, P., Hilpert, P., Falconier, M., & Bodenmann, G. (2018). Economic strain and support in couple: The mediating role of positive emotions. Stress and Health, 34(2), 320–330. https://doi.org/10.1002/smi.2794	Men's meanage was 39.30 (SD = 9.34, range = 21–66), and women's mean agewas 36.14 years (SD = 9.37, range = 20–64).	male, female	heterosexual			The majority of participants wereChristian‐Orthodox (89.25%), and the rest were Pentecostal (4.69%),Evangelist (2.73%), Catholic (1.87%), Adventist (0.85%), and Baptist(0.34%).	5.46% of women and 6.96%of men had finished middle school; 29.35% of women and 41.11% ofmen had a high school diploma; 11.85% of women and 12.63% of men had completed some post‐high‐school education; 43.69% ofwomen and 30.66% of men had a bachelor's degree; and 8.87% ofwomen and 9.40% of men had a postgraduate education.	79.3% of the men and 79% of the women wereemployed; 14.2% of the men and 14.6% of the women were unem-ployed; 0.3% of the men and 2.7% of the women were still students;and 2.7% of the men and 2.4% of the women were retired.	2% had a very low family income, 43.4%had a low family income, 44% had a moderate family income, and8.6% had a high family income.	Romania	On average, the marriageduration was 13.05 years (SD = 9.30; range = 0.25–40 years), and part-ners had been in the relationship on average for 15 years (SD = 8.64	Couples had on average 1.43 children
2018	Schechinger, H. A., Sakaluk, J. K., & Moors, A. C. (2018). Harmful and Helpful Therapy Practices With Consensually Non-Monogamous Clients: Toward an Inclusive Framework. Journal of Consulting and Clinical Psychology, 86(11), 879–891. https://doi.org/10.1037/ccp0000349	Mean(SD) = 36.62 (10.40)	62.25% were female, 24.90% were male, rest - Another term best described gender identity (e.g.,gender queer, trans	Bisexual43.37%,Straight25.70%,Gay or lesbian1.20%,Pansexual/omnisexual/queer26.91%		AfricanAmerican/ Black1.20%, Asian American.04%, European American/White82.73%, Latino/Latina.08%, Native American.04%, Multi-racial6.02%, Another term best described racial–ethnic identity5.62%					USA	Open relationship/marriage 8.43%, Swinging/In the “Lifestyle” 1.20%, Polyamory 78.71%, Another term best described consensually non-monogamous arrangement (e.g., monogamish)or specifically non-labeled 11.65%
2018	Thomeer, M. B., LeBlanc, A. J., Frost, D. M., & Bowen, K. (2018). Anticipatory Minority Stressors among Same-sex Couples: A Relationship Timeline Approach. Social Psychology Quarterly, 81(2), 126–148. https://doi.org/10.1177/0190272518769603	ranged in age from21 to 78 years	Half of the couples were female			53 percent of the couples atleast one partner identified as a racial/ethnic minority					San Francisco, California, and Atlanta,Georgia	evenly dispersed across three rela-tionship duration categories (6 months to\3 years, 3 years to\7 years, and_x0015_7years).
2018	Totenhagen, C., Randall, A., & Lloyd, K. (2018). Stress and Relationship Functioning in Same-Sex Couples: The Vulnerabilities of Internalized Homophobia and Outness: Stress and Relationship Functioning in Same-Sex Couples. Family Relations, 67(3), 399–413. https://doi.org/10.1111/fare.12311	ranged from 18 to 61 years of age(M=33.7,SD=9.9)	female, male	female-female, male-male		Caucasian (74%) or Hispanic/LatinAmerican Origin (10%)		95% atleast some college			Arizona, Alabama	in relationship for 0 to 35 years	21% reported that they had chil-dren living at home
2018	Totenhagen, C., Wilmarth, M., Serido, J., & Betancourt, A. (2018). Do Day-to-Day Finances Play a Role in Relationship Satisfaction? A Dyadic Investigation. Journal of Family Psychology, 32(4), 528–537. https://doi.org/10.1037/fam0000406		male, female	heterosexual				range from high school to PHD		below $20k to above $160k
2018	Vencill, J. A., Carlson, S., Iantaffi, A., & Miner, M. (2018). Mental health, relationships, and sex: exploring patterns among bisexual individuals in mixed orientation relationships. Sexual and Relationship Therapy, 33(1-2), 14–33. https://doi.org/10.1080/14681994.2017.1419570	Participants (n= 53) ranged in age from 18 to 61 years old, with an averageage of 30.26 years (SD = 10.27 years).	Forty-three participants reported their gender identity asa woman (81.1%), 5 as a man (9.4%), and 5 as genderqueer/fluid (9.4%).	All participants identified as bisexual, though sev-eral reported using additional identity labels such as queer (n= 5) and pansexual (n= 1)		Participants were overwhelmingly White (96%,n= 51), though a few iden-tified as multi-racial (4%,n= 2).						58.5% had been in a relationship for 3 or more years, 17% were married. 11% were in a open relationship and teh others were new relationships.
2018	Xu, F., Hilpert, P., Nussbeck, F. W., & Bodenmann, G. (2018). Testing Stress and Dyadic Coping Processes in Chinese Couples. International Journal of Stress Management, 25(1), 84–95. https://doi.org/10.1037/str0000051
2019	Chaves, C., Canavarro, M. C., & Moura‐Ramos, M. (2019). The Role of Dyadic Coping on the Marital and Emotional Adjustment of Couples With Infertility. Family Process, 58(2), 509–523. https://doi.org/10.1111/famp.12364	Male - 34.67_x0001_4.13 (26–48), Female - 32.73_x0001_3.69 (24–39)	female, male	heterosexual	Infertility			Majority of participants had secondary or higher education.	More than 90% of men and women were employed.	91% were medium ses, others were low ses	52% were urban residents.	Couples were on average in a relation-ship for approximately 6 years (M=5.98;SD=3.10).
2019	Cooper, A. N., May, R. W., & Fincham, F. D. (2019). Stress Spillover and Crossover in Couple Relationships: Integrating Religious Beliefs and Prayer. Journal of Family Theory & Review, 11(2), 289–314. https://doi.org/10.1111/jftr.12330
2019	Feinstein, B. A., McConnell, E., Dyar, C., Mustanski, B., & Newcomb, M. E. (2019). The Influence of Stress on Depression and Substance Use Problems Among Young Male Same-Sex Couples: Relationship Functioning as an Underlying Mechanism. Clinical Psychological Science, 7(5), 928–940. https://doi.org/10.1177/2167702619842561	Participants in the analytic sample ranged in age from 16 to 50 years (M= 22.85 years, SD= 4.01).	Most participants were cisgender men, but 11 dyads included a transgender partner.	gay (79.4%), followed by bisexual (15.1%) and other (5.5%).		The racial/ethnic composition of the sample was 33.0% Black, 30.7% Latino, 27.5% White, and 8.7% other.		The highest level of educa-tion included less than high school (8.7%), high school (25.7%), some college (48.2%), college (12.4%), and graduate school (5.0%).
2019	Gamarel, K., Sevelius, J., Reisner, S., Coats, C., Nemoto, T., & Operario, D. (2019). Commitment, interpersonal stigma, and mental health in romantic relationships between transgender women and cisgender male partners. Journal of Social and Personal Relationships, 36(7), 2180–2201. https://doi.org/10.1177/0265407518785768		Transgender women, male	heterosexual							SFO area
2019	Gilmour, A. L., Whisman, M. A., & Randall, A. K. (2019). Relationship Discord and Depressive Symptoms in Sexual Minority Individuals Over Time. Journal of Family Psychology, 33(8), 994–999. https://doi.org/10.1037/fam0000554	X	male, female	LGB and heterosexual		36% White, 38% Black, and 25% Latino.
2019	Guschlbauer, A., Smith, N., DeStefano, J., & Soltis, D. (2019). Minority stress and emotional intimacy among individuals in lesbian and gay couples: Implications for relationship satisfaction and health. Journal of Social and Personal Relationships, 36(3), 855–878. https://doi.org/10.1177/0265407517746787	18 to 65 (M¼34.56,SD¼12.34)	107 women (59.1%), 64 men (35.4%), 3 trans-gender individuals (1.7%), including 2 female-to-male individuals (1.1%), and 1 male-to-female individual (0.6%).	Onehundred and nine participants identified as lesbian (60.2%) and 72 identified as gay(39.8%).		(85.6%,n¼155) identified as White. Three(1.7%) identified as Black, three (1.7%) identified as Latino/Latina, nine (5.0%) iden-tified as Asian/Pacific Islander, one (.6%) identified as Native American/AmericanIndian/Aboriginal, and nine (5.0%) identified as multiracial					North american countries	Sixty participants (33.1%)identified as being in a relationship, living together; another 60 (33.1%) identified asbeing in a relationship, living apart; and 65 (35.9%) identified as being married or in acivil union/domestic partnership/equivalent. Length of time in the relationship rangedFigure 1.Hypothesized model.Guschlbauer et al.861 from 4 months to 40 years (M¼5.76 years,SD¼7.45)	Majority with no children
2019	Heron, K. E., Lewis, R. J., Shappie, A. T., Dawson, C. A., Amerson, R., Braitman, A. L., Winstead, B. A., & Kelley, M. L. (2019). Rationale and Design of a Remote Web-Based Daily Diary Study Examining Sexual Minority Stress, Relationship Factors, and Alcohol Use in Same-Sex Female Couples Across the United States: Study Protocol of Project Relate. JMIR Research Protocols, 8(2), e11718–e11718. htt…		women	same-sex
2019	Holman, E. (2019). The effects of minority stressors in the workplace on same-sex relationships: A collective case study of female couples. Journal of Lesbian Studies, 23(2), 196–223. https://doi.org/10.1080/10894160.2019.1520541		Female, Three individuals, and their romantic partners, participated in this study.	Lesbian
2019	Jibeen, T. (2019). Influence of acculturative stress on marital satisfaction: Moderation effect of gender role and communication styles in Pakistani immigrants. Community Development (Columbus, Ohio), 50(5), 536–556. https://doi.org/10.1080/15575330.2019.1656659	25 to 50	female, male	heterosexual		Pakistani immigrant, first generation		Nineteen percent of the sample reported having college-leveleducation, 37% reported graduate-level education, 30% reported having a master’sleveldegree, and 13% reported having a professional education.	7% of theparticipants were physical laborers, 17% worked in the human service sector, 40% wereemployed in professional or managementfields, and 35% of the total participants identifiedthemselves as housewives	9% of thetotal participants reported a high level of income comfort, 65% reported a moderate level,and 26% reported a low level of income comfort	Toronto, Canada	Married
2019	Maroufizadeh, S., Hosseini, M., Rahimi Foroushani, A., Omani-Samani, R., & Amini, P. (2019). The Relationship between Perceived Stress and Marital Satisfaction in Couples with Infertility: Actor-Partner Interdependence Model. International journal of fertility & sterility, 13(1), 66–71. https://doi.org/10.22074/ijfs.2019.5437	Age (Y)Men 34.92 ± 6.35, Women 29.82 ± 6.00	male, female	heterosexual		Iranian		Non-academic Men 96 (68.1) Women 85 (60.3), Academic Men 45 (31.9), Women 56 (39.7)			Iran	Duration of marriage (Y)7.37 ± 4.40	Infertility
2019	Pepping, C. A., Cronin, T. J., Halford, W. K., & Lyons, A. (2019). Minority Stress and Same‐Sex Relationship Satisfaction: The Role of Concealment Motivation. Family Process, 58(2), 496–508. https://doi.org/10.1111/famp.12365	ranging in age from 18 to73 (M=30.37,SD=10.78).	The sample included 142 (39.1%) males, 216 (59.5%) females,and 5 (1.4%) who did not identify as either male or female	320 (88.1%) identified as either a gay male or lesbian female, 38 (10.5%) were bisexual,and 5 (1.4%) did not identify with these orientations.		The majority of participants reported anAnglo-Celtic/Caucasian background (N=310; 85.4%), and the remainder reported otherbackgrounds, including Asian, African, Middle Eastern, and Indigenous Australian.		96 (26.4%) participants reported havingobtained undergraduate university qualifications, and 61 (16.8%) reported post-graduatequalifications. A further 123 (33.9%) had obtained a tertiary qualification at a nonuniver-sity institution, and 83 (22.9%) reported their highest level of education was high school orlower			Mostlived in major cities (N=251; 69.1%), and the remainder reported living in nonurbanareas (N=107; 29.5%)	Mean relationship duration was3.87 years (SD=4.91), ranging from<1 year to 30 years. Most participants reported cur-rently living with their partner (N=251; 69.1%)
2019	Scott, S. B., Whitton, S. W., & Buzzella, B. A. (2019). Providing Relationship Interventions to Same-Sex Couples: Clinical Considerations, Program Adaptations, and Continuing Education. Cognitive and Behavioral Practice, 26(2), 270–284. https://doi.org/10.1016/j.cbpra.2018.03.004
2019	Springer, K. W., Lee, C., & Carr, D. (2019). Spousal Breadwinning Across 30 Years of Marriage and Husbands’ Health: A Gendered Life Course Stress Approach. Journal of Aging and Health, 31(1), 37–66. https://doi.org/10.1177/0898264317721824		male,female	heterosexual							USA	Married more than 30 years
2019	Stewart, S.-J. F., Frost, D. M., & LeBlanc, A. J. (2019). Understanding How Emerging Same-Sex Couples Make Meaning of Minority Stress: A Narrative Approach. Journal of Family Psychology, 33(2), 183–193. https://doi.org/10.1037/fam0000495	Participant’s ages ranged from 21 years to 78 years. The averageage for male couples was 41.6 years, and the average age forfemale couples was 38.3 years.		Same-sex		The sample was ethnically andracially diverse with 47% (n_x0002_56) of the couples comprising twoWhite partners, 24% (n_x0002_29) of the couples comprising tworacial/ethnic minority partners, and 29% (n_x0002_35) comprising oneWhite partner and one racial/ethnic minority partner.						only couples who fell intothe “newer” relationship category (6 months to 3 years;n_x0002_40)were included in the analysis.
2019	Wofford, N., Defever, A. M., & Chopik, W. J. (2019). The Vicarious Effects of Discrimination: How Partner Experiences of Discrimination Affect Individual Health. Social Psychological & Personality Science, 10(1), 121–130. https://doi.org/10.1177/1948550617746218	ranging in age from 50 to 94 (M¼66.81,SD¼8.92)	male, female	heterosexual		83.7%Caucasian, 8.1%African Amer-ican, 6.4%Hispanic, and 1.8%Other.		high school (15.1%had less than a high school education,36.9%had a high school education or GED, and 48.0%had atleast some college education)
2020	Baldoni, F., Giannotti, M., Casu, G., Luperini, V., & Spelzini, F. (2020). A Dyadic Study on Perceived Stress and Couple Adjustment During Pregnancy: The Mediating Role of Depressive Symptoms. Journal of Family Issues, 41(11), 1935–1955. https://doi.org/10.1177/0192513X20934834	Fathers (M= 36.35, SD= 7.15, range 22–58 years) were moderately older than mothers (M= 32.62, SD= 5.02, range 19-44 years	female, male	heterosexual		Majority Italian		Secondary education was the highest educational level reported by about half of both mothers (50%) and fathers (52.6%),	Majority of fathers and mothers were employed.			About half of the couples (n= 56, 49.1%) were married	44 women (38.6%) and 43 men (37.7%) already had children at the time of assessment
2020	Casey, L. J., Wootton, B. M., & McAloon, J. (2020). Mental Health, Minority Stress, and the Australian Marriage Law Postal Survey: A Longitudinal Study. American Journal of Orthopsychiatry, 90(5), 546–556. https://doi.org/10.1037/ort0000455	Mean age - mid 30s	87% cisgender male or female, 10% nonbinary, rest transgender male or female	72% homosexual, 12% bisexual, rest - diverse		89% Caucasian					Australia	55.8% in a relationship, 33% single, the rest - diverse
2020	Cho, D., Milbury, K., & McNeill, L. H. (2020). Stress and cancer-related lifestyle factors among African American heterosexual couples. PloS One, 15(5), e0232577–e0232577. https://doi.org/10.1371/journal.pone.0232577	Men-51.27(12.36), Women-48.69(11.59)	men, women	heterosexual							USA
2020	Cooper, A., Tao, C., Totenhagen, C., Randall, A., & Holley, S. (2020). Daily stress spillover and crossover: Moderating effects of difficulties in emotion regulation in same-sex couples. Journal of Social and Personal Relationships, 37(4), 1245–1267. https://doi.org/10.1177/0265407519891777	participants were 33.7 years old (SD¼9.9, range¼18.8–61.1 years)	women (71.6%)	lesbian (51.2%), gay (29.6%), bisexual (11.7%), queer (5.6%), or other (1.9%).		Caucasian (74.1%)		95% atleast some college			Arizona, Alabama	had been in their relationship for 5.4 years (SD¼6.0, range¼0.3–35.0years). Approximately 18%indicated they were married, and of those who were notmarried, 82%reported they lived together
2020	Kennedy, H. R., & Dalla, R. L. (2020). “It may be legal, but it is not treated equally”: marriage equality and well-being implications for same-sex couples. Journal of Gay & Lesbian Social Services, 32(1), 67–98. https://doi.org/10.1080/10538720.2019.1681340	Participants ranged in age from 22–71 years (M=43.26 years;SD=12.36 year	majority were female (n=153; 70%)	gay/lesbian (n=180; 82%) orbisexual (n=24; 11%		Most self-identified as White (n=195; 89%		This was a highly educated group, with most partic-ipants (n=163; 75%) having earned a Bachelor’s degree or higher.			Iowa and border-states (e.g.Nebraska, Missour	legally married same-sex couple	A portion had biological (n¼46; 21%) or adopted (n¼14; 6%) children
2020	Kim, J., & Luke, N. (2020). Men’s Economic Dependency, Gender Ideology, and Stress at Midlife. Journal of Marriage and Family, 82(3), 1026–1040.https://doi.org/10.1111/jomf.126155
2020	Kwon, S. (2020). Perceived neighborhood disorder and psychological distress among Latino adults in the United States: Considering spousal/partner relationship. Journal of Community Psychology, 48(3), 726–743. https://doi.org/10.1002/jcop.22288			heterosexual		Latino					50 states andWashington DC	married or cohabitating
2020	LeBlanc, A. J., & Frost, D. M. (2020). Couple-Level Minority Stress and Mental Health among People in Same-Sex Relationships: Extending Minority Stress Theory. Society and Mental Health, 10(3), 276–290. https://doi.org/10.1177/2156869319884724	mean age reported by sample respondentswas 35 years	46 percent female, 54 percent male	Same sex		Forty-nine percent of participating couples werecouples where at least one partner was a personof color. Fifteen percent identified as Spanish/Hispanic/Latino. In terms of race, about one-fifth(17.5 percent) of the sample identified as Black orAfrican American, and smaller proportions identi-fied as Asian (3 percent) or Native Hawaiian orPacific Islander (2.5 percent). Just under three-quarters (…		More than half had completeda bachelor’s degree or additional education beyondthat degree (56 percent).			29 percent Midwest, 21 percent North-east, 21 percent South, and 29 percent West. Twenty-four percent of couples residedin a rural area.	relationship duration (35 percent six months to less than years,36 percent three years to less than years, and 29 percent seven years or more). Twenty-one percent were legallymarried, or both legally married and in a registereddomestic partnership or civil union (RDP/CU),while 19 percent were in a RDP/CU but withoutbeing also legally married. Sixty percent were inrelationships with no legal recog…
2020	Li, X., Ye, L., Tian, L., Huo, Y., & Zhou, M. (2020). Infertility-Related Stress and Life Satisfaction among Chinese Infertile Women: A Moderated Mediation Model of Marital Satisfaction and Resilience. Sex Roles, 82(1/2), 44–53. https://doi.org/10.1007/s11199-019-01032-0
2020	Mittinty, M. M., Kindt, S., Mittinty, M. N., Bernardes, S., Cano, A., Verhofstadt, L., & Goubert, L. (2020). A Dyadic Perspective on Coping and its Effects on Relationship Quality and Psychological Distress in Couples Living with Chronic Pain: A Longitudinal Study. Pain Medicine (Malden, Mass.), 21(2), e102–e113. https://doi.org/10.1093/pm/pnz267	The mean age of patientsand spouses (SD) was 52.4 (11.7) and 53.6 (12.02) years,respectively.	82% (N=114) of patients were female and 81% of spouses were male.	heterosexual majority, 2 were same-sex	Chronic pain	All couples identified as Caucasian.		More than one-third of the couples reportedan education beyond the age of 18 years (37% for patients,34.3% for spouses).	Sixty percent of the patients were un-employed, whereas the majority of spouses had full-timeemployment (65%).			The majority of the participants were married or cohabitat-ing (82%), with a mean length of relationship (SD) of 25.2(14.96) years.
2020	Neilands, T. B., LeBlanc, A. J., Frost, D. M., Bowen, K., Hoff, C. C., & Chang, J. (2020). Measuring a New Stress Domain: Validation of the Couple-Level Minority Stress Scale. Archives of Sexual Behavior, 49(1), 249–265. https://doi.org/10.1007/s10508-019-01487-y	34.80 (8.6)	45.3% women			48.1% - one or both partners are a racial minority. 72%white, 18% black, rest were diverse	77.8% were employed full-time	57.1% had bachelor's degree or higher		75% of respondents were in the income range $65,000 to $150,000	USA	98% were cohabiting. 57.5% were in a relationship not legally recognzed, participants had been in a relationship atleast 6 months or more. More than 60% had been in the relationship for greater than 3 years.	17.9% had atleast 1 child.
2020	Newcomb, M. E. (2020). Romantic relationships and sexual minority health: A review and description of the Dyadic Health Model. Clinical Psychology Review, 82, 101924–101924. https://doi.org/10.1016/j.cpr.2020.101924			Sexual minority
2020	Nguyen, T. P., Karney, B. R., & Bradbury, T. N. (2020). When Poor Communication Does and Does Not Matter: The Moderating Role of Stress. Journal of Family Psychology, 34(6), 676–686. https://doi.org/10.1037/fam0000643	Meanage for husbands was 27.9 years (SD_x0002_5.8) and 26.3 years (SD_x0002_5.0) for wives.	male,female	heterosexual		Twelve percentof couples were African American, 12% were Caucasian, and 76%were Hispanic				Mean income was $34,153 (SD_x0002_$27,094) forhusbands and $28,672 (SD_x0002_$24,549) for wives.	living in low-incomeneighborhoods in Los Angeles County.	first time newly married. At baseline, marriages averaged 4.8 monthsin duration (SD_x0002_2.5) and 38.5% of couples had children.
2020	Song, C., Buysse, A., Zhang, W., Lu, C., Zhao, M., & Dewaele, A. (2020). Coping with minority stress in romantic relationships among lesbian, gay and bisexual people. Current Psychology (New Brunswick, N.J.). https://doi.org/10.1007/s12144-020-01188-z	The sample ranged inage from 19 and 79 years, with a mean age of 35.05 years(SD= 10.97 years)	The sample was 53.00% male (n=785),47.00% female (n=696).	more heterosexual than ho-mosexual’(1.4%),‘bisexual’(8.3%),‘more homosexual thanheterosexual’(12.9%),‘homosexual’(71.7%), or‘somethingelse’(5.7%)
2020	Thomson, P., Howie, K., Leslie, S. J., Angus, N. J., Andreis, F., Thomson, R., Mohan, A. R. M., Mondoa, C., & Chung, M. L. (2020). Evaluating emotional distress and health-related quality of life in patients with heart failure and their family caregivers: Testing dyadic dynamics using the Actor-Partner Interdependence Model. PloS One, 15(1), e0227129–e0227129. https://doi.org/10.1371/journal.pone…	Patientsmeanagewas68.6years(SD= 10.8)andcaregiversmeanagewas65.8years(SD= 10.6).	Most patients were men(78%)and most caregivers were women(83%),which is often typical in studies of patients and caregivers.	heterosexual	heart failure			Mean education years: Patients:13, caregivers: 11	Retired-Patients-75.6%, care-givers-68.3%
2020	Washburn-Busk, M., Morgan, P., & Vennum, A. (2020). The Interaction of Health Stressors and Power Imbalances in Partnered Women: Wellbeing Outcomes. Journal of Feminist Family Therapy, 32(3-4), 192–212. https://doi.org/10.1080/08952833.2020.184805	The mean age of participants was 34.5 years old, ranging between ages 17 and 39 (SD =.49). The average age of participants’ partners was 36 years old, ranging between 16 and 69.	male, female	heterosexual		70.2%- German native, rest were varied		72.9% - vocational education	79.9% - employed fulltime		Germany	The mean length of time married for participants was about 8 years, ranging between 0 and 23 years of marriage.
2020	Washburn-Busk, M., Morgan, P., & Vennum, A. (2020). The Interaction of Health Stressors and Power Imbalances in Partnered Women: Wellbeing Outcomes. Journal of Feminist Family Therapy, 32(3/4), 192–213. https://doi.org/10.1080/08952833.2020.1848052
2021	Hocker, L., Kline, K., Totenhagen, C. J., & Randall, A. K. (2021). Hold my hand: Associations between minority stress, commitment, and PDA for same-gender couples. Journal of Social and Personal Relationships, 26540752110205–. https://doi.org/10.1177/02654075211020501	ages ranged from 19 to 61years old (M¼33.80,SD¼9.91).	same-gender couples (n¼64 female, 31 male dyads;	Ninety-two (48.4%) people self-identified as lesbian,64 (33.7%) as gay, 22 (11.6%) as bisexual, nine (4.7%) as queer, and three (1.6%)asother.		pre-dominantly Caucasian (73.7%)		Fifty-eight (30.5%) participants reported completing agraduate degree, and 53 (27.9%) an undergraduate degree.			two areas in the UnitedStates: 1) Tuscaloosa and Birmingham, Alabama, and 2) the Phoenix, Arizona metro-area via flyers and social media platforms.	Most participants reportedbeing in a committed relationship and living with their partner (49.5%), with 18.1%ofcouples married, 19.7%engaged and living together, and 11.7%in a committed rela-tionship but not currently living together. Relationship length ranged from 2.5 months to35 years (M¼5.33 years,SD¼5.82 years).
2021	Maiya S, Killoren SE, Monk JK, Kline GC, Chavez FLC. Latino/a young adults’ experiences of acculturative stress, depressive symptoms, and romantic relationship commitment: Ethnic identity as protective. Journal of Social and Personal Relationships. 2021;38(5):1738-1749. doi:10.1177/0265407521996472	60.8%women;Mage¼24.8 years,SD¼3.2	female, male	86% heterosexual		Latino					United States	Most participants were engaged/married (57.1%), had Latino/a romantic partners(61.7%)
2021	Vale, M. T., & Bisconti, T. L. (n.d.). Minority Stress and Relationship Well-Being in Sexual Minorities: The Varying Role of Outness on Relationship and Sexual Satisfaction. International Journal of Sexual Health, ahead-of-print(ahead-of-print), 1–15. https://doi.org/10.1080/19317611.2021.1909684	Age, range (M)18–80 (40.93)	Woman 50.80, Man 43.70, Gender Diverse 5.50	Lesbian/Gay 80.10, Bisexual 10.60, Another Orientation 9.30		Black 3.40, Non-Latinx White87.60, Latinx2.60, Asian1.30, Mixed Race 5.10		High/Vocational School 4.80, Some College18.20, College 29.90, Post College Degree 47.20				range in years (M)1–56 (10.41). Married, %47.00, Monogamous, %84.90, Live with Partner, %75.90
2021	Vo, N. H., & Lee, S. M. (2021). Acculturative Stress and Life Satisfaction of Immigrant Vietnamese Wives Living in South Korea: The Moderating Role of Intimate Partner Violence. Journal of Interpersonal Violence. https://doi.org/10.1177/0886260520986271		female, male	heterosexual		East Asian, South Korean, Vietnamese		Mostly high schho or lower degree. About 21% were higher than that.	Wives were mostly unemployed	Overall monthly income was low.	South Korea - Vietamese multicultural relationship	married
2021	Ward, D. E., Park, L. E., Walsh, C. M., Naragon-Gainey, K., Paravati, E., & Whillans, A. V. (2021). For the love of money: The role of financially contingent self-worth in romantic relationships. Journal of Social and Personal Relationships, 38(4), 1303–1328. https://doi.org/10.1177/0265407521991663	Mage=38.77,SD=12.75	male, female	heterosexual		82%White, 7.8%Asian,4.8%Black, 3.6%Hispanic, and 1.8%other ethnicities						married or marrie dlike relationships
2000	Pimentel, E. E. (2000). Just How Do I Love Thee?: Marital Relations in Urban China. Journal of Marriage and Family, 62(1), 32–47. https://doi.org/10.1111/j.1741-3737.2000.00032.x		2,170 women, 1,985 men	Heterosexual		Asian, Chinese		Highly educated - 20% women and 29% men are university educated	Workers at several universities and a ministry	Middle or Upper-Middle Class	Beijing, China	2,152/2,150 married, only first marriage couples	Both parents and non-parents; used parental status as a measure of life-course position
2000	A. Klein, R. C., &amp; Milardo, R. M. (2000). The Social Context of Couple Conflict: Support and Criticism from Informal Third Parties. Journal of Social and Personal Relationships, 17(4-5), 618–637. https://doi.org/10.1177/0265407500174008
2001	Sprecher, S. (2001). Equity and Social Exchange in Dating Couples: Associations With Satisfaction, Commitment, and Stability. Journal of Marriage and Family, 63(3), 599–613. https://doi.org/10.1111/j.1741-3737.2001.00599.x	Mean age at Time 1 = 20. Mean age at Time 5 = 24-25.	38 women, 36 men	Heterosexual		Caucasion				Middle or Upper-Middle Class		Dating on average for 18.7 months
2001	Xu, Y. and Burleson, B.R. (2001), Effects of Sex, Culture, and Support Type on Perceptions of Spousal Social Support: An Assessment of the “Support Gap” Hypothesis in Early Marriage. Human Communication Research, 27: 535-566. https://doi.org/10.1111/j.1468-2958.2001.tb00792.x	10.4% 18–21,29.7% 22–25, 45% 26–29, 13.4% 30–33, and 1.5% wereover 33 years old.	X Americans (50 men and 50 women); Chinese (50 men and 52 women)			X 100 native-born Americans; 102 native-born Chinese (All in the USA at the time of the study: Chinese could have resided in the U.S. no more than 5 years). The American sample consisted of 96 Caucasians and 4 Hispanics. The Chinese sample consisted of 99 persons from mainland China and 3 from Taiwan.						All participants were recently married individuals, defined here asthose married at least 1 year, but not more than 5 years. Mean 2.14 years (SD = 1.19 years)
2001	Lorenz, F.O., Hraba, J. and Pechacova, Z. (2001), Effects of Spouse Support and Hostility on Trajectories of Czech Couples' Marital Satisfaction and Instability. Journal of Marriage and Family, 63: 1068-1082. https://doi.org/10.1111/j.1741-3737.2001.01068.x	436 Czech couples. Age unspecified	X 436 husbands 436 wives	unspecified (heterosexual?)	unspecified	unspecified	unspecified	(X) level of husbans' and wives' education. Mean = 12.8 ; SD = 2.19	(X) husbans and wives working in the private sector (husbans mean = 31.2; wives mean = 11.1) or retired (husbans mean = 7.6; wives mean = 7.8)	family income (thousands in Krona; mean =120.9; SD = 61.7)	Czech Republic		(X) numer of children at home (M = 1.23; SD = 1)
2002	Haas, S. M. (2002). Social Support as Relationship Maintenance in Gay Male Couples Coping with Hiv or Aids. Journal of Social and Personal Relationships, 19(1), 87–111. https://doi.org/10.1177/0265407502191005	Average age: 38; Range: 23-58 years old	Males: 134; Females: 108	Homosexual	One or both partners were HIV-positive or had AIDS. 37.5% unable to work because of work-related injury. 37.5% unable to work due to disability from HIV. 25% currently working while experiencing problematic HIV-medication side-effects.	37 Caucasion, 3 African American		27% only completed high school, 73% completed some of college, 37.5% have two-year college degree, 25% have four-year college degree, 0.075% have master's degree		middle class	Midwestern university hospital in the U.S.	Committed and cohabitating, average couple had been together for 7.5 years
2002	Haas, S. M. (2002). Social Support as Relationship Maintenance in Gay Male Couples Coping with Hiv or Aids. Journal of Social and Personal Relationships, 19(1), 87–111. https://doi.org/10.1177/0265407502191005			x	x
2002	Lichtenstein, E., Andrews, J. A., Barckley, M., Akers, L., & Severson, H. H. (2002). Women helping chewers: Partner support and smokeless tobacco cessation. Health Psychology, 21(3), 273-278. http://0-dx.doi.org.opac.unicatt.it/10.1037/0278-6133.21.3.273
2002	Martire, L. M., Stephens, M. A., Druley, J. A., & Wojno, W. C. (2002). Negative reactions to received spousal care: predictors and consequences of miscarried support. Health psychology : official journal of the Division of Health Psychology, American Psychological Association, 21(2), 167–176.
2003	Julien, D., Chartrand, E., Simard, M.-C., Bouthillier, D., & Bégin, J. (2003). Conflict, social support and relationship quality: An observational study of heterosexual, gay male and lesbian couples' communication. Journal of Family Psychology, 17(3), 419–428. https://doi.org/10.1037/0893-3200.17.3.419	Average age: 32	(X) Males: 134; Females: 108	X 42 heterosexual, 46 gay male, and 33 lesbian couples		Caucasion		Heterosexual: 47% college degree; Homosexual males: 35% college degree; Homosexual females: 38%		Income was categorized from 1 (less than $10,000) to 5 ($40,000 and more in Canadian dollars): average was 2.5 --> Middle class	Montreal and surrounding Canada suburbs --> a large metropolitan area	Cohabitating couples	Heterosexual: 59% with kids; Homosexual males: 12% with kids; Homosexual females: 11% with kids
2003	Kurdek, L. A. (2003). Differences between Gay and Lesbian Cohabiting Couples. Journal of Social and Personal Relationships, 20(4), 411–436. https://doi.org/10.1177/02654075030204001		x	x
2003	Burleson, B. R. (2003). The experience and effects of emotional support: What the study of cultural and gender differences can tell us about close relationships, emotion and interpersonal communication. Personal Relationships, 10(1), 1–23. https://doi.org/10.1111/1475-6811.00033		x			x
2003	Taniguchi, K., Akechi, T., Suzuki, S., Mihara, M., & Uchitomi, Y. (2003). Lack of marital support and poor psychological responses in male cancer patients. Supportive care in cancer : official journal of the Multinational Association of Supportive Care in Cancer, 11(9), 604–610. https://doi.org/10.1007/s00520-003-0495-z
2003	Trief, P. M., Sandberg, J., Greenberg, R. P., Graff, K., Castronova, N., Yoon, M., & Weinstock, R. S. (2003). Describing support: A qualitative study of couples living with diabetes. Families, Systems, & Health, 21(1), 57–67. https://doi.org/10.1037/h0089502
2003	Lichtenthal, W. G., Cruess, D. G., Schuchter, L. M., & Ming, M. E. (2003). Psychosocial factors related to the correspondence of recipient and provider perceptions of social support among patients diagnosed with or at risk for malignant melanoma. Journal of health psychology, 8(6), 705–719. https://doi.org/10.1177/13591053030086005		X partner's gender: male and female		X patients diagnosed with or at risk for malignant melanoma
2004	Koesten, J. (2004). Family Communication Patterns, Sex of Subject, and Communication Competence. Communication Monographs, 71(2), 226–244. https://doi.org/10.1080/0363775052000343417		x	x
2004	Weller, J. E., & Dziegielewski, S. F. (2004). The Relationship Between Romantic Partner Support Styles and Body Image Disturbance. Journal of Human Behavior in the Social Environment, 10(2), 71-92. http://0-dx.doi.org.opac.unicatt.it/10.1300/J137v10n02_04
2004	DeLongis, A., Capreol, M., Holtzman, S., O'Brien, T., & Campbell, J. (2004). Social support and social strain among husbands and wives: a multilevel analysis. Journal of family psychology : JFP : journal of the Division of Family Psychology of the American Psychological Association (Division 43), 18(3), 470–479. https://doi.org/10.1037/0893-3200.18.3.470
2004	Walitzer, K. S., & Dermen, K. H. (2004). Alcohol-focused spouse involvement and behavioral couples therapy: evaluation of enhancements to drinking reduction treatment for male problem drinkers. Journal of consulting and clinical psychology, 72(6), 944–955. https://doi.org/10.1037/0022-006X.72.6.944
2005	Pasch, L. A., Bradbury, T. N., &amp; Davila, J. (2005). Gender, negative affectivity, and observed social support behavior in marital interaction. Personal Relationships, 4(4), 361–378. https://doi.org/10.1111/j.1475-6811.1997.tb00151.x	At least 35 years old. Husbands averaged 25.4 years old. Wives averaged 24 years old.	60 males and 60 females	Heterosexual		75% were Caucasion, 10% were Hispanic, 7% were Asian, 5% were AfricanAmerican, and 3% indicated “Other” for their race		Husbands averaged 15.6 years of formal education. Wives averaged 15.6 years of formal education.		Husbands and wives had modal gross annual income between $11,000 and $20,000		Newlywed couples who live together	No children
2005	Pierce, G. R., Dodge, K. L., & Ptacek, J. J. (2005). Social support in spouses of cancer patients: What do they get and to what end? Personal Relationships, 4(4), 431–449. https://doi.org/10.1111/j.1475-6811.1997.tb00155.x	Wife average age: 69. Husband average age: 58	95 males and 95 females	Heterosexual	Wives: Cancer patients. 94% not working due to retirement or illness.	82% caucasion, 18% Native Americans		Wives: 91% completed high school, additional 29% completed 4 year college. Husbands: 97% completed high school, additional 43% completed 4 year college.	71% husbands employed	Middle class			Averaged between 2-4 children
2005	Henly, J. R., Danziger, S. K., & Offer, S. (2005). The contribution of social support to the material well-being of low-income families. Journal of Marriage and Family, 67(1), 122–140. https://doi.org/10.1111/j.0022-2445.2005.00010.x	Measured between three age groups: under 24, between 25–34, and 35+			Over one fifth met our criteria for having a significant health problem, and one third met the diagnostic screening criteria for at least one mental health disorder or alcohol/drug dependency	44% White and 56% African American		More than one fourth did not graduate from high school or obtain high-school equivalency	About one third were not employed, 41% were classified as having a poor quality job, and 26% a better quality job.	63% of respondents lived in households below the poverty line. Average monthly household income for the total sample was $1,595. The average perceived economic hardship score was 2.42 (on a scale from 1 to 5, SD =1.1).	Urban sample	Thirty-seven percent were married or cohabiting, and 28% lived in an extended family household	The majority had children 5 years of age or under
2005	Dalla, R.L. and Gamble, W.C. (2005), Weaving a tapestry of relational assistance: A qualitative investigation of interpersonal support among reservation‐residing Navajo teenage mothers. Personal Relationships, 6: 251-267. https://doi.org/10.1111/j.1475-6811.1999.tb00191.x	(x)	(x)			x
2005	de Ridder, Denise T. D., Schreurs, K. M. G., & Kuijer, R. G. (2005). Is spousal support always helpful to patients with asthma or diabetes? A prospective study. Psychology & Health, 20(4), 497-508. http://0-dx.doi.org.opac.unicatt.it/10.1080/14768320500098699				X
2005	Tracy, S. W., Kelly, J. F., & Moos, R. H. (2005). The influence of partner status, relationship quality and relationship stability on outcomes following intensive substance-use disorder treatment. Journal of studies on alcohol, 66(4), 497–505. https://doi.org/10.15288/jsa.2005.66.497
2006	Rini, C., Schetter, C. D., Hobel, C. J., Glynn, L. M., & Sandman, C. A. (2006). Effective social support: Antecedents and consequences of partner support during pregnancy. Personal Relationships, 13(2), 207–229. https://doi.org/10.1111/j.1475-6811.2006.00114.x	Average: 30 years old. Range: 18-42 years old.	Focused on women but analyzed behavior of male partners	Heterosexual		(x) 46% Non-Hispanic White, 24% Hispanic, 13% African merican or Black, 9% Asian, 7% another ethnicity (including bi- or multiracial)		Mean educational attainment was 14.6 years. 15% finished high school, 27% completed some college, 31% completed undergraduate degree, 12% completed graduate degree.		(x) Average gross annual household income between $50,000 and $70,000 (range < $5,000 to > $100,000)		78% married, 19% cohabitating, 2% not cohabitating but planning to marry	176 pregnant women
2006	Troy, A. B., Lewis-Smith, J., &amp; Laurenceau, J.-P. (2006). Interracial and intraracial romantic relationships: The search for differences in satisfaction, conflict, and attachment style. Journal of Social and Personal Relationships, 23(1), 65–80. https://doi.org/10.1177/0265407506060178	Average age: 20	59 males and 59 females	heterosexual		6 African American couples, 33 Hispanic couples, 4 Asian-Pacific Islander couples, and 43 European American couples, 9 European American/Hispanic couples, 4 Hispanic/other couples, 3 African American/other couples, 3 African American/Hispanic couples, 3 European American/other couples, 2 African American/European American couples, 2 Asian-Pacific Islander/Hispanic couples, 2 European American/Asi…		In college	College students		Southeastern U.S. university	Dating, not married, not cohabitating	Not parents
2006	Reinhardt, J. P., Boerner, K., & Horowitz, A. (2006). Good to have but not to use: Differential impact of perceived and received support on well-being. Journal of Social and Personal Relationships, 23(1), 117–129. https://doi.org/10.1177/0265407506060182	Avarage age 80; SD = 7 Inclusion criteria: community dwelling (in the northeast USA), English speaking, age 65 or older, and the presence of functional vision problems within the past 5 years	52% female, 48% male (Men were oversampled to permit study of gender differences)		(x) All have a vision problem not medically or surgically solvable: macular degeneration (64%), cataracts (34%) and glaucoma (26%). Functional disability (assessed with the OARS Multidimensional Functional Assessment Questionnaire) = difficulty in instrumental and personal daily living (0 = ‘no difficulty’ to ‘2 = needs help/cannot do task)	White (86 %),African American (11%), Hispanic (3%)		31% less than high school, 27% high school graduates, 42% more than a high school			Northeast USA	(x) 39% married, 48% widowed, 8% separated or divorced, 5% never married
2006	Greenglass, E., Fiksenbaum, L., & Eaton, J. (2006). The relationship between coping, social support, functional disability and depression in the elderly. Anxiety, Stress & Coping, 19(1), 15–31. https://doi.org/10.1080/14659890500436430	Age of the respondents ranged from 62 to 98 years, with an average age of 75 (SD 6.88) years	predominantly female (78.2%)		Involved in a variety of hobbies and general interest classes, such as traveling (51%), cooking (49%), gardening (21%), knitting (13%), yoga (5%), bowling (1.3%), and cards (23%)			14.3% reported less than a high school education; 52.6% had completed high school; 22.5% had completed community college or an undergraduate university degree; and 10.5% had a postgraduate degree.	Most were retired (88.3%). Fifty-five percent were involved in volunteer work, on average 7.30 (SD 6.12) hours per week			. Fortyfive percent were widowed, 39.8% were married, and 15.2% were single, separated, divorced, or common law
2006	Shrout, P. E., Herman, C. M., & Bolger, N. (2006). The costs and benefits of practical and emotional support on adjustment: A daily diary study of couples experiencing acute stress. Personal Relationships, 13(1), 115–134. https://doi.org/10.1111/j.1475-6811.2006.00108.x	Average examinee age = 29.4. Average partner age = 29.5		Heterosexual		More than 90% of both examinees and partners were white		81% of partners had at least Bachelors of Arts level education			New York State law schools	2/3 couples were married and had been living together for average of 3.3 years
2006	Fekete, E. M., Stephens, M. A. P., Druley, J. A., & Greene, K. A. (2006). Effects of spousal control and support on older adults' recovery from knee surgery. Journal of Family Psychology, 20(2), 302–310. https://doi.org/10.1037/0893-3200.20.2.302	Patients had to be 60 years of age or older, diagnosed with OA of the knee, undergoing unilateral knee surgery, and the spouse had to be the primary caregiver after hospital discharge (mean age = 70)	x 34 (48.6%) male; 36 (51.4%) female	not specified (heterosexual)	x (?) undergoing unilateral knee surgery	69 (98.6%) were Caucasian	unspecified	57% high school graduates, and an additional 33% were college graduates.	Most patients were not working (80%)	average annual household income was $35,000	unspecified	Patients had been married for an average of 40.2 years	unspecified
2006	Beach, S. R. H., & Gupta, M. (2006). Directive and nondirective spousal support: Differential effects? Journal of Marital and Family Therapy, 32(4), 465–477. https://doi.org/10.1111/j.1752-0606.2006.tb01621.x
2006	Mickelson, K. D., Claffey, S. T., & Williams, S. L, (2006). The Moderating Role of Gender and Gender Role Attitudes on the Link Between Spousal Support and Marital Quality. Sex Roles, 55(1-2), 73-82. http://0-dx.doi.org.opac.unicatt.it/10.1007/s11199-006-9061-8	Age (years, mean) total: 36.86 women: 37.30 man: 36.43	X Gender: 1787 women (51.06%) and 1713 men (48.94%); and X Gender role attitudes			European-American 80.76% F=81.70% M=79.86% African-American 7.73% F=6.59% M=8.82% Hispanic 8.44% F=8.67% M=8.21% Other 3.07% F=3.04% M=3.10%				Household income (mean) $44,752 F=$45,852 M=$43,696	U.S.
2006	Strating, M. M., van Schuur, W. H., & Suurmeijer, T. P. (2006). Contribution of partner support in self-management of rheumatoid arthritis patients. An application of the theory of planned behavior. Journal of behavioral medicine, 29(1), 51–60. https://doi.org/10.1007/s10865-005-9032-5
2006	Martire, L. M., Keefe, F. J., Schulz, R., Ready, R., Beach, S. R., Rudy, T. E., & Starz, T. W. (2006). Older spouses' perceptions of partners' chronic arthritis pain: implications for spousal responses, support provision, and caregiving experiences. Psychology and aging, 21(2), 222–230. https://doi.org/10.1037/0882-7974.21.2.222
2006	Leonard, M. T., Cano, A., & Johansen, A. B. (2006). Chronic pain in a couples context: a review and integration of theoretical models and empirical evidence. The journal of pain, 7(6), 377–390. https://doi.org/10.1016/j.jpain.2006.01.442
2007	Cutrona, C. E., Shaffer, P. A., Wesner, K. A., & Gardner, K. A. (2007). Optimally matching support and perceived spousal sensitivity. Journal of family psychology : JFP : journal of the Division of Family Psychology of the American Psychological Association (Division 43), 21(4), 754–758.	59 married couples. Mean age for husbands was 25.2 years and for wives 24.4 years, and couples had been married an average of 2.8 years (SD = 2.1)	X 59 husbands; 59 wives	not specified (heterosexual)	unspecified	all caucasian	unspecified	unspecified but all student housing at a Midwestern university	unspecified	unspecified	Midwest	All but three couples were in their first marriage. Married an average of 2.8 years (SD = 2.1)	67% childless
2007	Norton, T. R., & Manne, S. L. (2007). Support concordance among couples coping with cancer: Relationship, individual, and situational factors. Journal of Social and Personal Relationships, 24(5), 675–692. https://doi.org/10.1177/0265407507081454	(X) 239 couples cancer patients and their spouses. patients were 56 years of age (SD = 11.22, Range = 29–78)	(X) patient sample was comprised of 113 men and 126 women. The spouse sample was composed of 126 men and 113 women	heterosexual	(X) Patient population with tumor: colorectal (n = 118), breast (n = 65), and lung (n = 21). Approximately 44% diagnosed with advanced-stage disease (Stage III or IV). The 62% of patients had metastatic disease, liver (n = 83) and lymph nodes (n = 20). Most patients were in active medical treatment throughout their study participation	The majority of patients (93%) were Caucasian. Most spouses (93%) were Caucasian	unspecified	Many patients (56%) had completed college. Approximately 55% of spouses had completed college	34% of the patients were employed either full time or part time. d 52% were employed either full time or part time	unspecified	USA	On average, couples had been married for 27 years (SD = 13.82, Range = 1–52)	unspecified
2007	Beer, A. M., Morgan, R. D., Garland, J. T., & Spanierman, L. B. (2007). The role of romantic/intimate relationships in the well-being of incarcerated females. Psychological Services, 4(4), 250-261. doi:http://0-dx.doi.org.opac.unicatt.it/10.1037/1541-1559.4.4.250	211 adult female inmates from a midwestern department of corrections. mean age of the participants was 35.5 years (SD = 8.6)	(x) female			primarily of Caucasian (54.9%) and African American (25.3%) participants, but included participants of other ethnic/racial groups (i.e., 7.1% American Indian or Native American, 1.1% Hispanic/Latina, 1.1% Asian or Asian American, and 9.3% “other”)		mean for years of education was 11.96 years (SD = 1.88)			U.S. midwestern	123 reported involvement in a relationship, 93 (75.6%) 1 current romantic relationship, 12 (9.8%) 2 current romantic relationships, 4 (3.2%) reported 3 or more current relationships, and 13 (10.6%) did not respond to the item asking number of relationships. Reported relationship status was as follows: 54 (29.7%) single, 39 (21.4%) married, 39 (21.4%) partnered/common law married, 29 (15.9%) divor…	majority of our participants had one or more children (84.1%), and the mean number of children for participants was 2.27 (SD = 1.57)	X Inmates of a department of corrections
2007	Siegel, S. D., Molton, I., Penedo, F. J., Llabre, M. M., Kinsinger, D. P., Traeger, L., Schneiderman, N., & Antoni, M. H. (2007). Interpersonal sensitivity, partner support, patient-physician communication, and sexual functioning in men recovering from prostate carcinoma. Journal of personality assessment, 89(3), 303–309. https://doi.org/10.1080/00223890701629847
2007	Luszczynska, A., Gerstorf, D., Boehmer, S., Knoll, N., & Schwarzer, R. (2007). Patients' coping profiles and partners' support provision. Psychology & Health, 22(7), 749-764. http://0-dx.doi.org.opac.unicatt.it/10.1080/14768320600976232
2007	Luszczynska, A., Boehmer, S., Knoll, N., Schulz, U., & Schwarzer, R. (2007). Emotional support for men and women with cancer: Do patients receive what their partners provide? International Journal of Behavioral Medicine, 14(3), 156–163. doi:10.1007/bf03000187	173 dyads	X 108 male patient/female partner couples and 65 female patient/male partner couples	heterosexual	gastrointestinal cancer surgery
2007	Lemola, S., Stadlmayr, W., & Grob, A. (2007). Maternal adjustment five months after birth: The impact of the subjective experience of childbirth and emotional support from the partner. Journal of Reproductive and Infant Psychology, 25(3), 190–202. https://doi.org/10.1080/02646830701467231
2008	Fergus, S., Lewis, M. A., Darbes, L. A., & Kral, A. H. (2008). Social Support Moderates the Relationship Between Gay Community Integration and Sexual Risk Behavior Among Gay Male Couples. Health Education & Behavior, 36(5), 846–859. https://doi.org/10.1177/1090198108319891	Mean age = 37, age range = 20-63	Males and females	Homosexual	23% participants diagnosed HIV positive, 18% participants diagnosed AIDS. 69% couples both partners HIV negative, 11% couples both partners HIV positive, 19% couples were serodiscordant	83% of the sample was White, 9% was Latino, and 4% identified as African American		60% of the sample had completed college, with 24% of participants holding postgraduate degrees	56% were employed full-time, and 13% were part-time workers. Eight percent of participants were full-time students	About one third of participants reported an annual income of less than $15,000, another third reported earning between $15,000 and $35,000 per year, and the final third reported income of more than $35,000.		about 25% of participants have been datinf for 1 year or less, about 25% dating between 1 and 3 years, about 25% between 3 and 6 years, about 25% longer than 6 years. Only 12% couples had been together for less than 6 months. 80% couples cohabitating. 26% nonmonogamous.
2008	Brock, R. L., & Lawrence, E. (2008). A longitudinal investigation of stress spillover in marriage: does spousal support adequacy buffer the effects?. Journal of family psychology : JFP : journal of the Division of Family Psychology of the American Psychological Association (Division 43), 22(1), 11–20. https://doi.org/10.1037/0893-3200.22.1.11	101 Couple married less than 6 months and in their first marriages; Husbands’ average age was 25.82 (SD = 3.55), and wives’ average age was 24.78 (SD = 3.67)	(X) 101 husbands; 101 wives	heterosexual	unspecified	15% identified themselves as ethnic minorities	unspecified	Modal years of education was 14 for both spouses	unspecified	As of Time 1, average annual joint income was $30,001–$40,000	Iowa (USA)	(X) Couples dated an average of 44 months (SD = 27) prior to marriage, 76% cohabited premaritally, Eligible couples completed questionnaires through the mail five times during the first 5 years of marriage: at 3 to 6 months (Time 1), at 12 to 15 months (Time 2), at 21 to 24 months (Time 3), at 30 to 33 months (Time 4)	By time 4 of the study, 35% of the couples were parents
2008	Scholz, U., Knoll, N., Roigas, J., & Gralla, O. (2008). Effects of provision and receipt of social support on adjustment to laparoscopic radical prostatectomy. Anxiety, stress, and coping, 21(3), 227–241. https://doi.org/10.1080/10615800801983759	77 couples: prostatectomy patients’ and their spouses’. Patients' age (M=61.57 years, SD=6.03; range = 44–73); Partners' age (M=58.46 years, SD=7.52; range = 38–73)	patients men; spouses unspecified	unspecified	X All patients underwent laparoscopic radical prostatectomy. After surgery, patients stayed at the hospital for a mean of 5.94 days, SD=2.15. Four patients experienced gastrointestinal, pneumonal, or cardiovascular complications after surgery, and one patient had to be transferred to the intensive care unit	unspecified	unspecified	79.2% of the spouses provided data on their education. About half of the patients (48.1%) and about half of the spouses with valid data (57.4%) reported 9 to 10 years of schooling, and 49.4% of patients and 41% of spouses reported 12 to 13 years of schooling	About half of the patients (58.9%) were retired	unspecified	Germany	67 married, 9 in a stable relationship, and 1 patient was in a new relationship with his partner	85.7% of the couples had children
2008	Lawrence, E., Pederson, A., Bunde, M., Barry, R. A., Brock, R. L., Fazio, E., Mulryan, L., Hunt, S., Madsen, L., & Dzankovic, S. (2008). Objective Ratings of Relationship Skills across Multiple Domains as Predictors of Marital Satisfaction Trajectories. Journal of social and personal relationships, 25(3), 445–466. https://doi.org/10.1177/0265407508090868	101 Newlywed couples in which both spouses were between the ages of 18 and 55. Husbands’ average age was 25.91 (SD = 3.09); Wives’ average age was 24.5 (SD = 3.46)	X 101 husbands and 101 wives	heterosexual	unspecified	For 15% of the couples, at least one member of the couple identified him or herself as a member of an ethnic minority group	unspecified	Husbands’ modal years of education were 14 years. Wives’ modal years of education were also 14 years	unspecified	unspecified	Midwest USA	Newlywed couples	unspecified
2008	KIECOLT, K.J., HUGHES, M. and KEITH, V.M. (2008), Race, social relationships, and mental health. Personal Relationships, 15: 229-245. https://doi.org/10.1111/j.1475-6811.2008.00195.x	8,098 noninstitutionalized persons aged 15–54 years in the 48 coterminous states in the United States			X May have or not: Psychological distress; Any mental disorder; Any substance use disorder	X 666 African American and 4,498 White
2008	Iida, M., Seidman, G., Shrout, P. E., Fujita, K., & Bolger, N. (2008). Modeling support provision in intimate relationships. Journal of Personality and Social Psychology, 94(3), 460-478. doi:http://0-dx.doi.org.opac.unicatt.it/10.1037/0022-3514.94.3.460
2008	Lawrence, E., Bunde, M., Barry, R. A., Brock, R. L., Sullivan, K. T., Pasch, L. A., White, G. A., Dowd, C. E., & Adams, E. E. (2008). Partner support and marital satisfaction: Support amount, adequacy, provision, and solicitation. Personal Relationships, 15(4), 445–463. https://doi.org/10.1111/j.1475-6811.2008.00209.x
2008	Cano, A., Barterian, J. A., & Heller, J. B. (2008). Empathic and nonempathic interaction in chronic pain couples. The Clinical journal of pain, 24(8), 678–684. https://doi.org/10.1097/AJP.0b013e31816753d8
2008	Verhofstadt, L. L., Buysse, A., Ickes, W., Davis, M., & Devoldre, I. (2008). Support provision in marriage: the role of emotional similarity and empathic accuracy. Emotion (Washington, D.C.), 8(6), 792–802. https://doi.org/10.1037/a0013976
2008	Lucas, T., Parkhill, M. R., Wendorf, C. A., Olcay Imamoglu, E., Weisfeld, C. C., Weisfeld, G. E., & Shen, J. (2008). Cultural and Evolutionary Components of Marital Satisfaction: A Multidimensional Assessment of Measurement Invariance. Journal of Cross-Cultural Psychology, 39(1), 109–123. https://doi.org/10.1177/0022022107311969
2008	Waxman, S. E., Tripp, D. A., & Flamenbaum, R. (2008). The mediating role of depression and negative partner responses in chronic low back pain and relationship satisfaction. The journal of pain, 9(5), 434–442. https://doi.org/10.1016/j.jpain.2007.12.007
2009	Brock, R. L., & Lawrence, E. (2009). Too much of a good thing: underprovision versus overprovision of partner support. Journal of family psychology : JFP : journal of the Division of Family Psychology of the American Psychological Association (Division 43), 23(2), 181–192. https://doi.org/10.1037/a0015402	103 Couple married less than 6 months and in their first marriages; Husbands’ average age was 25.82 (SD = 3.55), and wives’ average age was 24.78 (SD = 3.67)	(X) 103 husbands; 103 wives	heterosexual	unspecified	15% identified themselves as ethnic minorities	unspecified	Modal years of education was 14 for both spouses	unspecified	Modal annual joint income ranged from $40,001 to $50,000	Iowa (USA)	(X) Couples dated an average of 44 months (SD = 27) prior to marriage, 76% cohabited premaritally, Eligible couples completed questionnaires through the mail five times during the first 5 years of marriage: at 3 to 6 months (Time 1), at 12 to 15 months (Time 2), at 21 to 24 months (Time 3), at 30 to 33 months (Time 4), and at 54 to 57 months after the wedding (Time 5)	unspecified
2009	Rafaeli, E., & Gleason, M. E. J. (2009). Skilled support within intimate relationships. Journal of Family Theory & Review, 1(1), 20-37. doi:http://0-dx.doi.org.opac.unicatt.it/10.1111/j.1756-2589.2009.00003.x	20 men. The average age (range 29-64 years) of participants was 44	(X) men	heterosexual	(X) 17 individuals reported obtaining the gastric bypass surgical procedure and 3 reported undergoing the lap band procedure within the last 5 years. average preoperative weight 363.03 pounds, range weight loss 67-190 pounds (M = 122.5)	16 Caucasian, 2 Hispanic 2self-reported as biracial (Mexican and Caucasian; Caucasian and Native American)	3 having no religious affiliation; 7 Christian (nondenomination), 2 Catholic, 2 Baptist, 2 Methodist, 1 Lutheran, 1 Protestant, and 2 Jewish (nonobservant)	nine participants having reported that their highest level of education was high school, six having some college education with no degree, and five having a Bachelor's degree		The average salary among the participants was $43,225 a year (with a range from no income-$115,000)	U.S. Respondents represented a number of geographic locations including the Northeastern, Western, Midwestern, and Southern areas of the United States	All individuals identified as being in a significant relationship with 16 participants reporting being married and four participants reporting not being married
2009	Barry, R. A., Bunde, M., Brock, R. L., & Lawrence, E. (2009). Validity and utility of a multidimensional model of received support in intimate relationships. Journal of Family Psychology, 23(1), 48-57. doi:http://0-dx.doi.org.opac.unicatt.it/10.1037/a0014174
2009	Khan, C. M., Iida, M., Stephens, M. A., Fekete, E. M., Druley, J. A., & Greene, K. A. (2009). Spousal support following knee surgery: roles of self-efficacy and perceived emotional responsiveness. Rehabilitation psychology, 54(1), 28–32. https://doi.org/10.1037/a0014753
2009	Gudmunson, C. G., Danes, S. M., Werbel, J. D., & Loy, J. T.-C. (2009). Spousal Support and Work—Family Balance in Launching a Family Business. Journal of Family Issues, 30(8), 1098–1121. https://doi.org/10.1177/0192513X09333758
2009	Julkunen, J., Gustavsson-Lilius, M., & Hietanen, P. (2009). Anger expression, partner support, and quality of life in cancer patients. Journal of psychosomatic research, 66(3), 235–244. https://doi.org/10.1016/j.jpsychores.2008.09.011
2009	Knoll, N., Scholz, U., Burkert, S., Roigas, J., & Gralla, O. (2009). Effects of received and mobilized support on recipients' and providers' self-efficacy beliefs: a 1-year follow-up study with patients receiving radical prostatectomy and their spouses. International journal of psychology : Journal international de psychologie, 44(2), 129–137. https://doi.org/10.1080/00207590701607930
2009	Garfield, C. F., & Isacco, A. (2009). Urban fathers' role in maternal postpartum mental health. Fathering: A Journal of Theory, Research, and Practice about Men as Fathers, 7(3), 286–302. https://doi.org/10.3149/fth.0703.286
2009	Priem, J. S., Solomon, D. H., & Steuber, K. R. (2009). Accuracy and bias in perceptions of emotionally supportive communication in marriage. Personal Relationships, 16(4), 531–551. https://doi.org/10.1111/j.1475-6811.2009.01238.x
2009	Knoll, N., Burkert, S., Kramer, J., Roigas, J., & Gralla, O. (2009). Relationship satisfaction and erectile functions in men receiving laparoscopic radical prostatectomy: effects of provision and receipt of spousal social support. The journal of sexual medicine, 6(5), 1438–1450. https://doi.org/10.1111/j.1743-6109.2009.01244.x
2009	Barry, R. A., Bunde, M., Brock, R. L., & Lawrence, E. (2009). Validity and utility of a multidimensional model of received support in intimate relationships. Journal of family psychology : JFP : journal of the Division of Family Psychology of the American Psychological Association (Division 43), 23(1), 48–57. https://doi.org/10.1037/a0014174
2010	Overall, N. C., Fletcher, G. J. O., & Simpson, J. A. (2010). Helping Each Other Grow: Romantic Partner Support, Self-Improvement, and Relationship Quality. Personality and Social Psychology Bulletin, 36(11), 1496–1513. https://doi.org/10.1177/0146167210383045	Study 1: 150 university students mean age of 22.09 years (SD = 5.50). Study 2: 47 heterosexual couples ranged in age from 18 to 49 (M = 24.09, SD = 5.68)	X Study 1; 84 women, 66 men; Study 2: 47 male and 47 female	Study 1: unspecified; Study 2 heterosexual	unspecified	unspecified	unspecified	Study 1: university student	unspecified	unspecified	New Zealand	Study 1: Mean relationship duration was 23.10 months (SD = 19.40). The majority (73%) of the sample was involved in serious relationships, living with their partner or married; Study 2: Mean relationship duration was 3.01 years (SD = 2.87), and 62% of the sample was living together or married	unspecified
2010	Iida, M., Parris Stephens, M. A., Rook, K. S., Franks, M. M., & Salem, J. K. (2010). When the going gets tough, does support get going? Determinants of spousal support provision to type 2 diabetic patients. Personality & social psychology bulletin, 36(6), 780–791. https://doi.org/10.1177/0146167210369897	129 couples = Patients with Type 2 diabetes and their nondiabetic spouses older than 54 years of age; patients were 66.1 years of age (SD = 7.7) and spouses were 66.0 years of age (SD = 8.8)	X 129 male and 129 female	heterosexual	x Patients with Type 2 diabetes and their nondiabetic spouses. One half of patients were female, and patients had been diagnosed with diabetes for an average of 11.6 years (SD = 9.3)	Patients = Caucasian (75.0%), African American (23.6%), Asian American (0.8%), Native American (0.8%). Spouses = Caucasian (77%), African American (21.3%), Asian American (0.8%), Native American (0.8%)	unspecified	Patients had completed an average of 13.8 years (SD = 2.4) of education and spouses had completed 13.8 years (SD = 2.4)	unspecified	Average household income was between $30,000 and $39,999		Couples had been married (or in a marriage-like relationship) for an average of 38.0 years (SD = 13.9)
2010	Sheridan, M. A., Sherman, M. L., Pierce, T., & Compas, B. E. (2010). Social support, social constraint, and affect in spouses of women with breast cancer: The role of cognitive processing. Journal of Social and Personal Relationships, 27(1), 5–22. https://doi.org/10.1177/0265407509347836 Copy to Clipboard	male spouses of women with breast cancer (N = 105). participants were between the ages of 36 and 79 years old (mean = 54.4, SD = 8.9)	(X) male spouses	heterosexual	(X) spouses of women with non-metastatic breast cancer (15% Stage 0, 43% Stage I, 38% Stage II, and 4% Stage III)	Primarily Caucasian (n = 96), with 4 identifying as a minority (two Native American and two of mixed/other ethnicity) and 5 choosing not to identify ethnicit	unspecified	unspecified	unspecified	unspecified	Canada	unspecified	unspecified
2010	Vilchinsky, N., Haze-Filderman, L., Leibowitz, M., Reges, O., Khaskia, A., & Mosseri, M. (2010). Spousal support and cardiac patients' distress: The moderating role of attachment orientation. Journal of Family Psychology, 24(4), 508-512. http://0-dx.doi.org.opac.unicatt.it/10.1037/a0020009
2010	Beverly, E. A., & Wray, L. A. (2010). The role of collective efficacy in exercise adherence: A qualitative study of spousal support and Type 2 diabetes management. Health Education Research, 25(2), 211-223. http://0-dx.doi.org.opac.unicatt.it/10.1093/her/cyn032
2010	Tang, C. S., Lai, B. P., & Chung, T. K. (2010). Influences of mastery, spousal support, and adaptive coping on sexual drive and satisfaction among chinese gynecologic cancer survivors. Archives of sexual behavior, 39(5), 1191–1200. https://doi.org/10.1007/s10508-009-9528-0
2010	Schokker, M. C., Links, T. P., Luttik, M. L., & Hagedoorn, M. (2010). The association between regulatory focus and distress in patients with a chronic disease: The moderating role of partner support. British Journal of Health Psychology, 15(1), 63–78. https://doi.org/10.1348/135910709X429091
2011	Dagan, M., Sanderman, R., Schokker, M. C., Wiggers, T., Baas, P. C., van Haastert, M., & Hagedoorn, M. (2011). Spousal support and changes in distress over time in couples coping with cancer: the role of personal control. Journal of family psychology : JFP : journal of the Division of Family Psychology of the American Psychological Association (Division 43), 25(2), 310–318. https://doi.org/10.103…	70 couple: patients newly diagnosed with colorectal cancer and their intimate partners. Patients mean age 61.2 (SD 10); partners mean age 60.3 (SD 10)	X Patients: 52 male (74.3%); 18 female (25.7%). Partners: 18 male (25.7%) 52 female (74.3%)	heterosexual	X Patients: cancer at stage I (11), stage II (22); stage III (31); stage IV (2) and their partners	unspecified	unspecified	patients: 7 elementary school; 40 secondary educations; 23 highter educations; partner 7 elementary school; 47 secondary educations; 16 highter educations	patients; 27 paid job, 27 retired; partner : 21 paid job, 17 retired	unspecified	Netherlands	62 couples married (Mean = 34; SD = 13); 8 not married	unspecified
2011	Ko, L. K., & Lewis, M. A. (2011). The Role of Giving and Receiving Emotional Support on Depressive Symptomatology among Older Couples: An Application of the Actor-Partner Interdependence Model. Journal of social and personal relationships, 28(1), 83–99. https://doi.org/10.1177/0265407510387888	(X) 423 married couples: participants spoke English, were married, and were not institutionalized. Mean age for husbands was 82.93 (SD=5.35); for wives it was 78.83 (SD=6.13)	X 423 Husbands and 423 wives	heterosexual	The majority reported good or excellent health. More husbands than wives, however, experienced limitations in their daily activities due to health (35% vs 30%, p < .05)	Most partecipants white (88%) U.S. born (89%)	unspecified	Husbands more educated than their wives, with 62% having completed at least some high school, compared to 48% of wives	unspecified	unspecified	USA	had been married an average of 52 years (+13 years)	averaged two to three children
2011	Sherman, A. M., Skrzypek, A., Bell, R., Tatum, C., & Paskett, E. D. (2011). The contribution of social support and social strain to depressive symptoms in African American, Native American, and European American women. Journal of Social and Personal Relationships, 28(8), 1104–1129. https://doi.org/10.1177/0265407511406895	249 women ranged in age from 41.0 to 89.4 years old	(x) 249 women	unspecified	unspecified	(X) 104 (42%) of whom were Native American (enrolled members of the Lumbee tribe), 84 (34%) of whom were African American, and 61 (24%) of whom were European American	unspecified	21% of the participants had more than a high school diploma, 30% had a high school diploma or General Equivalency Degree (GED) and the remainder of the sample had not finished high school	unspecified	76% of the sample reported an annual household income of less than $20,000	North Carolina	44% of the sample was married or partnered	unspecified
2011	Schrodt, P. (2011). Stepparents’ and nonresidential parents’ relational satisfaction as a function of coparental communication in stepfamilies. Journal of Social and Personal Relationships, 28(7), 983–1004. https://doi.org/10.1177/0265407510397990	Residential stepparent and nonresidential parent dyads. 40 residential stepparents (ages 27–62, M = 47.25, SD = 7.80) and 40 nonresidential parents (ages 25–61, M = 47.73, SD = 7.23) participated (N = 80)	Residential stepparents included 25 stepfathers and 15 stepmothers. Nonresidential parents included 25 fathers and 15 mothers	unspecified	unspecified	The majority of participants were Caucasian (80.0%, n = 32 dyads)	unspecified	The majority of residential stepparents had completed some college (42.5%), a bachelor’s degree (27.5%), or a masters degree (7.5%), whereas the majority of nonresidential parents had completed a high school diploma (27.5%), some college (25.0%), or a bachelor’s degree (25.0%)	unspecified	unspecified	Midwestern (n = 54, 27 dyads) or Southwestern (n = 26, 13 dyads) regions of the United States	(X) The majority of residential stepparents remarried (85.0%), though six (15%) were cohabitating. Half of the stepparents had been previously divorced once, though 13 (32.5%) had never been divorced and the remaining (n = 7) had been divorced two or more times. The majority of non residential parents were not remarried (52.5%), though 18 (45.0%) had remarried (and one provided no data). Most non…	The average age of the target children (all young adults, n = 40) was 21.9 years (SD = 3.87)
2011	Martire, L. M., Stephens, M. A. P., & Schulz, R. (2011). Independence centrality as a moderator of the effects of spousal support on patient well-being and physical functioning. Health Psychology, 30(5), 651–655. https://doi.org/10.1037/a0023006				(x)
2011	de Grood, J. A., & Wallace, J. E. (2011). In sickness and in health: An exploration of spousal support and occupational similarity. Work & Stress, 25(3), 272-287. http://0-dx.doi.org.opac.unicatt.it/10.1080/02678373.2011.610645		X 552 (70%) men and 237 (30%) women						Xall lawyers, results analized for partner as same occupation or not. The majority of lawyers (78%) reported having a spouse who was employed at the time of the study and 17% were married to another lawyer		province of Alberta, Canada
2011	Hagedoorn, M., Dagan, M., Puterman, E., Hoff, C., Meijerink, W. J. H. J., DeLongis, A., & Sanderman, R. (2011). Relationship satisfaction in couples confronted with colorectal cancer: The interplay of past and current spousal support. Journal of Behavioral Medicine, 34(4), 288-297. http://0-dx.doi.org.opac.unicatt.it/10.1007/s10865-010-9311-7				x
2011	Hagedoorn, M., Dagan, M., Puterman, E., Hoff, C., Meijerink, W. J. H. J., DeLongis, A., & Sanderman, R. (2011). Relationship satisfaction in couples confronted with colorectal cancer: The interplay of past and current spousal support. Journal of Behavioral Medicine, 34(4), 288-297. http://0-dx.doi.org.opac.unicatt.it/10.1007/s10865-010-9311-7
2011	Gremigni, P., Mariani, L., Marracino, V., Tranquilli, A. L., & Turi, A. (2011). Partner support and postpartum depressive symptoms. Journal of Psychosomatic Obstetrics & Gynecology, 32(3), 135-140. http://0-dx.doi.org.opac.unicatt.it/10.3109/0167482X.2011.589017
2011	Kinsinger, S. W., Laurenceau, J., Carver, C. S., & Antoni, M. H. (2011). Perceived partner support and psychosexual adjustment to breast cancer. Psychology & Health, 26(12), 1571-1588. http://0-dx.doi.org.opac.unicatt.it/10.1080/08870446.2010.533771
2011	Blackmore, D. E., Hart, S. L., Albiani, J. J., & Mohr, D. C. (2011). Improvements in partner support predict sexual satisfaction among individuals with multiple sclerosis. Rehabilitation Psychology, 56(2), 117-122. http://0-dx.doi.org.opac.unicatt.it/10.1037/a0023362
2011	Iles, J., Slade, P., & Spiby, H. (2011). Posttraumatic stress symptoms and postpartum depression in couples after childbirth: the role of partner support and attachment. Journal of anxiety disorders, 25(4), 520–530. https://doi.org/10.1016/j.janxdis.2010.12.006
2011	Lal, A., & Bartle-Haring, S. (2011). Relationship among differentiation of self, relationship satisfaction, partner support, and depression in patients with chronic lung disease and their partners. Journal of marital and family therapy, 37(2), 169–181. https://doi.org/10.1111/j.1752-0606.2009.00167.x
2011	Wallace, J. E., & Jovanovic, A. (2011). Occupational Similarity and Spousal Support: A Study of the Importance of Gender and Spouse's Occupation. Relations industrielles/Industrial Relations, 66(2), 235-255. https://0-www-proquest-com.opac.unicatt.it/scholarly-journals/occupational-similarity-spousal-support-study/docview/914765550/se-2?accountid=9941
2011	Rini, C., Redd, W. H., Austin, J., Mosher, C. E., Meschian, Y. M., Isola, L., Scigliano, E., Moskowitz, C. H., Papadopoulos, E., Labay, L. E., Rowley, S., Burkhalter, J. E., Schetter, C. D., & Duhamel, K. N. (2011). Effectiveness of partner social support predicts enduring psychological distress after hematopoietic stem cell transplantation. Journal of consulting and clinical psychology, 79(1), 6…
2011	Güven, S., Sener, A., & Yildirim, B. (2011). SOCIOCONTEXTUAL VARIABLES THAT AFFECT SPOUSAL PERCEPTION OF SOCIAL SUPPORT. Social Behavior and Personality, 39(9), 1153-1160. http://0-dx.doi.org.opac.unicatt.it/10.2224/sbp.2011.39.9.1153					(X) religious marriage				X income level		(X) length of marriage, form of marriage (both religious and official marrige, or only official marriage)	(X) number of children
2011	Yao-fang, Z., & Xiao-yi, F. (2011). Relationships between help-seeking expression, partners' support coping and marital satisfaction among Chinese urban newlyweds. Chinese Journal of Clinical Psychology, 19(4), 496-498. https://0-www-proquest-com.opac.unicatt.it/scholarly-journals/relationships-between-help-seeking-expression/docview/909293597/se-2?accountid=9941
2011	Belcher, A. J., Laurenceau, J. P., Graber, E. C., Cohen, L. H., Dasch, K. B., & Siegel, S. D. (2011). Daily support in couples coping with early stage breast cancer: maintaining intimacy during adversity. Health psychology : official journal of the Division of Health Psychology, American Psychological Association, 30(6), 665–673. https://doi.org/10.1037/a0024705
2012	Reizer, A., Ein-Dor, T., & Possick, C. (2012). Living at risk: Dyadic examination of the links among environmental stress, attachment orientations and marital support provision. Journal of Social and Personal Relationships, 29(5), 694–712. https://doi.org/10.1177/0265407512443449	133 Jewish Israeli married couples divided into three groups according to their area of residence. On average, husbands were 33.8 years of age (SD = 10.4); wives were 32.58 years of age (SD = 10.2)	X 133 husbans and 133 wives	heterosexual	unspecified	Hebrewx	Jewish	Over 41% of the men and 71.5% of the women had an academic degree	unspecified	53.5% of the participants reported that their monthly income was below the average monthly income in Israel	X Israel: The high-risk group consisted of 69 couples from settlements on the eastern side of the Israeli security fence in the West Bank. The intermediate-risk group consisted of 32 couples residing in settlements on the western side of the security fence and closer to the Israeli border. The low-risk group consisted of 32 couples living within the recognized borders of the State of Israel	mean length of marriage was 10.97 years (SD = 8.5)	couples had an average of 3.41 children (SD = 2.5)
2012	Burke, T. J., Randall, A. K., Corkery, S. A., Young, V. J., & Butler, E. A. (2012). “You’re going to eat that?” Relationship processes and conflict among mixed-weight couples. Journal of Social and Personal Relationships, 29(8), 1109–1130. https://doi.org/10.1177/0265407512451199	43 heterosexual couples (86 individuals), ranging in age from 18 to 69 years old (M = 31.6, SD = 12.7). Age was fairly normally distributed 37% of between 18 and 25, 42% between 26 and 40, and 21% over 41	(X) 43 males and 43 females	heterosexual	unspecified	80% European American, 2.5% African American, 2.5% Asian American, and 15% other	unspecified	1% reported less than high school, 5% reported high school, 3% reported a professional program, 37% reported some college, 24% reported an undergraduate degree, and 13% reported a graduate degree	unspecified	34% yearly household income of US$24,000 or less, 24% US$25,000–50,000, 17% US$50,000–75,000, 2% US$75,000–100,000, 3% US$100,000–150,000, and 2% more than US$150,000	U.S.	X 15 matched healthy weight couples, 34.88%, 17 participants were categorized as HO (19.77%), 17 participants were categorized as OH (i.e., 17 mixed-weight couples, 19.77%), and 22 participants were categorized as OO (i.e., 11 matched overweight couples, 25.58%) Participants’ relationship length ranged from three months to 39 years, with a mean of 6.24 years (SD = 7.14). In addition, 48% of parti…	unspecified
2012	Frisby, B. N., Booth-Butterfield, M., Dillow, M. R., Martin, M. M., & Weber, K. D. (2012). Face and resilience in divorce: The impact on emotions, stress, and post-divorce relationships. Journal of Social and Personal Relationships, 29(6), 715–735. https://doi.org/10.1177/0265407512443452	participants who were divorced within two years. ranging in age from 20 to 58 (M = 36.60, SD = 10.66)	34 males, 66 females, and 3 who did not report their biological sex	unspecified	unspecified	unspecified	unspecified	unspecified	unspecified	unspecified	U.S.	X participants who were divorced within two years. Participants had been married an average of 9.91 years (1–29 years, SD = 8.16 years), and divorced an average of 1.05 years prior to taking this survey (1 month to 2 years, SD = .66 months)	Of the participants, 44.7% of the divorcees had no children, followed by 23.3% who had two children, 18.4% who had one child, 9.7% who had three children, 1.9% who had four children, and 1.9% who had six children.
2012	Stapleton, L. R. T., Schetter, C. D., Westling, E., Rini, C., Glynn, L. M., Hobel, C. J., et al. (2012). Perceived partner support in pregnancy predicts lower maternal and infant distress. Journal of Family Psychology, 26(3), 453-463. doi:http://0-dx.doi.org.opac.unicatt.it/10.1037/a0028332	n = 272 mothers. Mean maternal age was 30 years (SD = 5.1)	(X) female	unspecified	unspecified	Half of the sample self-identified as non-Hispanic White (53%) with subgroups of Latina (21%), African American (11%), and Asian American (10%)	unspecified	20% had a high school diploma or less education; 36% held a technical degree, certificate, associate's degree, or attended some college; and 52% held a bachelor's degree or higher	unspecified	16% under $30,000, 27% from $30,000–60,000, 24% from $60,000–90,000, and 33% over $90,000 (mean household size = 2.9 persons)	U.S.	The majority of the current sample was married at T1 (79%), and all but three reported their partner was the baby's father	X 18 weeks' singleton gestation or less at enrollment. Over half were having a first birth (58%). Infants were born on average at 39.0 weeks' gestation (SD = 1.7), and exactly half were male
2012	Shapiro, D. N., & Stewart, A. J. (2012). Dyadic support in stepfamilies: buffering against depressive symptoms among more and less experienced stepparents. Journal of family psychology : JFP : journal of the Division of Family Psychology of the American Psychological Association (Division 43), 26(5), 833–838. https://doi.org/10.1037/a0029591	125 step-parents (X) age unspecified	(X) 84 stepmothers and 41 stepfathers	unspecified	unspecified	European American: stepmother 89.3%, stepfathers 89.7%	unspecified	unspecified	unspecified	(X) in $= stepmothers: 12% < 40000, 19.3% 40-60000, 14.3% 60-80000, 16.9% 80-100000, 37.3% >100000; stepfathers: 17.5% < 40000, 15.0% 40-60000, 27.5% 60-80000, 10% 80-100000, 30% >100000		stepparents	(X) number of children and stepchildren: stepmothers mean 2.44 (SD=1.48); stepfathers mean 2.68 (SD=1.58)
2012	Snippe, E., Maters, G. A., Wempe, J. B., Hagedoorn, M., & Sanderman, R. (2012). Discrepancies between patients' and partners' perceptions of unsupportive behavior in chronic obstructive pulmonary disease. Journal of Family Psychology, 26(3), 464-469. doi:http://0-dx.doi.org.opac.unicatt.it/10.1037/a0028333	68 patients with chronic obstructive pulmonary disease COPD, between 40 and 80 years of age, and their partners. mean patients age was 64 (standard deviation [SD] = 9.5) and the mean partners age was 62 (SD = 9.7) years	Slightly more male patients participated (57%)	Heterosexual	X patients with chronic obstructive pulmonary disease COPD	unspecified	unspecified	Almost half of the patients (47%) and partners (46%) had a low level of education (primary school and/or vocational training for 12–16-year-olds)	unspecified	unspecified	Netherlands	Most of the couples were married (88%) and had been in a relationship for 34.2 years on average (SD = 14.2)	unspecified
2012	Don, B. P., & Mickelson, K. D. (2012). Paternal postpartum depression: The role of maternal postpartum depression, spousal support, and relationship satisfaction. Couple and Family Psychology: Research and Practice, 1(4), 323–334. https://doi.org/10.1037/a0029148	104 heterosexual couples	104 male and 104 female (x) focusing on paternal postpartum depression	heterosexual		mostly White (88% of participants)		college educated (75% of participants)		middle to upper income (72.2% of households made $60,000 or more a year)	northeast Ohio U.S.	Couples were either married or cohabiting (91% were married), and on average had been married/cohabiting for about 3 years (M = 3.38; SD = 2.16)	X at the beginning of the study, were in the third trimester of pregnancy with their first child
2012	Biehle, S. N., & Mickelson, K. D. (2012). Provision and receipt of emotional spousal support: The impact of visibility on well-being. Couple and Family Psychology: Research and Practice, 1(3), 244–251. https://doi.org/10.1037/a0028480
2012	Halbesleben, J. R. B., Wheeler, A. R., & Rossi, A. M. (2012). The costs and benefits of working with one's spouse: A two‐sample examination of spousal support, work–family conflict, and emotional exhaustion in work-linked relationships. Journal of Organizational Behavior, 33(5), 597-615. http://0-dx.doi.org.opac.unicatt.it/10.1002/job.771
2012	Costa, V., Pereira, M.G. and Pedras, S. (2012), Partner support, social-cognitive variables and their role in adherence to self-monitoring of blood glucose in type 2 diabetes. Eur. Diab. Nursing, 9: 81-86. https://doi.org/10.1002/edn.212
2012	Shapiro, D. N., & Stewart, A. J. (2012). Dyadic support in stepfamilies: buffering against depressive symptoms among more and less experienced stepparents. Journal of family psychology : JFP : journal of the Division of Family Psychology of the American Psychological Association (Division 43), 26(5), 833–838. https://doi.org/10.1037/a0029591
2012	Elfström, M., Karlsson, S., Nilsen, P., Fridlund, B., Svanborg, E., & Broström, A. (2012). Decisive situations affecting partners' support to continuous positive airway pressure-treated patients with obstructive sleep apnea syndrome: a critical incident technique analysis of the initial treatment phase. The Journal of cardiovascular nursing, 27(3), 228–239. https://doi.org/10.1097/JCN.0b013e31821…
2012	Verhofstadt, L. L., & Devoldre, I. (2012). Observed support provision in couples: The influence of biological sex and gender identity. Social Behavior and Personality: An International Journal, 40(1), 175–176. https://doi.org/10.2224/sbp.2012.40.1.175		X biological sex and X gender identity: husbands characterized as masculine and wives characterized as feminine
2013	South, S. C., Foli, K. J., & Lim, E. (2013). Predictors of relationship satisfaction in adoptive mothers. Journal of Social and Personal Relationships, 30(5), 545–563. https://doi.org/10.1177/0265407512462681	251 mothers who had adopted a child in the past 24 months. On average, participants were just over 40 years old (M = 40.3, SD = 6.7)	(X) female	heterosexual	Only 6% of the sample reported a history of a mental illness	predominantly Caucasian (90%)	71 Protestant, 41 Roman Catholic, 95 Nondenominational Christian, 44 Other/None/Decline to answers	Most participants had completed some college (57%) or postgraduate degrees (35%)	unspecified	(x) predominantly financially comfortable, with almost half of the respondents reporting incomes of $75,000 or above	U.S.	being married (N = 246) or in a committed romantic relationship (N = 5)	X Mothers who had adopted a child in the past 24 months (National or international adoption)
2013	Don, B. P., Mickelson, K. D., & Barbee, A. P. (2013). Indirect support seeking and perceptions of spousal support: An examination of a reciprocal relationship. Personal Relationships, 20(4), 655–668. https://doi.org/10.1111/pere.12006	204 new parents. The average age for the sample was 29 years old, with husbands (M = 29.99, SD = 4.77) being slightly older than wives (M = 28.06, SD = 3.80), t(206) = 3.23, p < .01	204 males and 204 females	heterosexual?	unspecified	mostly White (88%)	unspecified	mostly college educated (75%)	unspecified	middle to upper income (72.2% of households made $60,000 or more per year)	U.S.	Couples were either married (91%) or cohabiting (9%), and on average had been living together for about 3 years (M = 3.38, SD = 2.16)	X new parents interviewed during the third trimester of pregnancy, then again at 1-month and 4-month postpartum
2013	Balderrama-Durbin, C., Snyder, D. K., Cigrang, J., Talcott, G. W., Tatum, J., Baker, M., et al. (2013). Combat disclosure in intimate relationships: Mediating the impact of partner support on posttraumatic stress. Journal of Family Psychology, 27(4), 560-568. doi:http://0-dx.doi.org.opac.unicatt.it/10.1037/a0033412	76 partnered Airmen with an average age of 27.9 years (SD = 6.1, range = 21–42)	the majority (92%) were male	unspecified	X PTSD Symptoms	A majority (66%) of participants were Caucasian, followed by 14% African American, 11% Hispanic, 5% Asian, and 2% Native American	unspecified	mean years 13.7 (SD = 1.8, range = 12–20), with over half (60%) of the service members graduating from high school or earning a GED or higher.	X U.S. Air Force service members deployed to Iraq in a year-long, high-risk mission	unspecified	U.S.	mmitted relationship across the entirety of the deployment cycle	unspecified
2013	Hanley, K. E., Leifker, F. R., Blandon, A. Y., & Marshall, A. D. (2013). Gender differences in the impact of posttraumatic stress disorder symptoms on community couples’ intimacy behaviors. Journal of Family Psychology, 27(3), 525-530. doi:http://0-dx.doi.org.opac.unicatt.it/10.1037/a0032890	Married or cohabiting heterosexual couples (N = 64 couples, 128 individuals) in which at least one partner had experienced a stressful life event. average age of 37.2 (SD = 12.6, range 18–64)	(X) 64 female and 64 male	heterosexual	X at least one partner had PTSD	White (85.9%; 1.6% White Hispanic or Latino, 2.3% Nonwhite Hispanic or Latino, 6.3% African American, and 3.9% multiracial)	unspecified	14.31 (SD = 2.31) years of education	Few (17%) participants were students, and most (68.6%) were currently employed	an individual monthly income of $1,733.00 (SD = $1,529.00),	rural or semirural communities	The couples had been together for an average of 11 years and 11 months (SD = 11 years and 10 months, range 4 months to 45 years). Although some couples were unmarried (n = 17)	unspecified
2013	August, K. J., Rook, K. S., Franks, M. M., & Parris Stephens, M. A. (2013). Spouses’ involvement in their partners’ diabetes management: Associations with spouse stress and perceived marital quality. Journal of Family Psychology, 27(5), 712-721. doi:http://0-dx.doi.org.opac.unicatt.it/10.1037/a0034181	129 spouses whose partners were diagnosed with type 2 diabetes. Spouses ranged in age from 46 to 89 years old (M = 66.07, SD = 8.76)	Approximately half (50.4%) of the 129 spouses who participated in the current study were men	unspecified	X partners of patients wit type II diabetes having received a recommendation from a health care provider to make dietary improvements. Patients reported that they had been diagnosed with type 2 diabetes, on average, for 11.80 years (SD = 9.40)	A majority of spouses were non-Hispanic white (76.6%); the rest were African American/black (21.9%), or other races/ethnicities (1.6%)	unspecified	unspecified	unspecified	unspecified	U.S.	married or marital-like relationship, living in the same household as the patient. Couples were married, on average, 37.90 years (SD = 13.70). Most (81.1%) couples lived alone in their household	unspecified
2013	Graham, J. M., & Barnow, Z. B. (2013). Stress and social support in gay, lesbian, and heterosexual couples: Direct effects and buffering models. Journal of Family Psychology, 27(4), 569-578. doi:http://0-dx.doi.org.opac.unicatt.it/10.1037/a0033420	222 individuals from 111 couples (25 gay, 41 lesbian, and 45 heterosexual)	95 male and 127 female	X 25 gay, 41 lesbian, and 45 heterosexual	unspecified	A total of 12.2% of the couples were of the same ethnicity and non-White, and 21.1% of the couples were interracial. The remaining couples were White.	unspecified	unspecified	unspecified	unspecified	unspecified	All of the heterosexual couples were married. not collect information on the legal status of the gay and lesbian couples. all couples self-identified as cohabiting and as being involved in a committed romantic relationship. The age of the participants ranged from 19 to 74 (M = 34.7)	unspecified
2013	Donoho, C. J., Crimmins, E. M., & Seeman, T. E. (2013). Marital quality, gender, and markers of inflammation in the MIDUS cohort. Journal of Marriage and Family, 75(1), 127–141. https://doi.org/10.1111/j.1741-3737.2012.01023.x	Age (years): Men M=60.9; SD=11.3; Women M=57.3; SD=1.6	X Men n = 283; Women n = 259	unspecified	unspecified	all non-Hispanic White	unspecified	≥ college degree Men = 52% Women = 46%; < college degree Men = 48%, Women = 54%	unspecified	unspecified	U.S.	married	unspecified
2013	Knee, C. R., Hadden, B. W., Porter, B., & Rodriguez, L. M. (2013). Self-Determination Theory and Romantic Relationship Processes. Personality and Social Psychology Review, 17(4), 307–324. https://doi.org/10.1177/1088868313498000
2013	Gallagher, P., Yancy, W. S., Jr., Jeffreys, A. S., Coffman, C. J., Weinberger, M., Bosworth, H. B., & Voils, C. I. (2013). Patient self-efficacy and spouse perception of spousal support are associated with lower patient weight: Baseline results from a spousal support behavioral intervention. Psychology, Health & Medicine, 18(2), 175-181. http://0-dx.doi.org.opac.unicatt.it/10.1080/13548506.2012.7…
2013	Khan, C. M., Stephens, M. A. P., Franks, M. M., Rook, K. S., & Salem, J. K. (2013). Influences of spousal support and control on diabetes management through physical activity. Health Psychology, 32(7), 739–747. https://doi.org/10.1037/a0028609	70 couples (70 patients and 70 spuses), (X) The average patient age was 68.9 years (SD = 6.6)	half of the patients were female		X Patients on average had been diagnosed with Type 2 Diabetes M for 13.0 years (SD = 9.5)	most couple members (87.1%) were non-Hispanic White,		patients’ average years of education was 13.9 (SD = 2.2)		21.4% of couples reported their annual household income as falling below $30,000.		Couples on average were married/together for 42.1 years (SD = 11.4)	On avarage three children (M = 3.3, SD = 1.6), and 11.6% had children living with them
2013	Sperber, N. R., Sandelowski, M., & Voils, C. I. (2013). Spousal support in a behavior change intervention for cholesterol management. Patient education and counseling, 92(1), 121–126. https://doi.org/10.1016/j.pec.2013.02.015
2013	Don, B. P., Mickelson, K. D., & Barbee, A. P. (2013). Indirect support seeking and perceptions of spousal support: An examination of a reciprocal relationship. Personal Relationships, 20(4), 655-668. http://0-dx.doi.org.opac.unicatt.it/10.1111/pere.12006
2013	Crockett, E. E., & Neff, L. A. (2013). When receiving help hurts: Gender differences in diurnal cortisol responses to spousal support. Social Psychological and Personality Science, 4(2), 190–197. https://doi.org/10.1177/1948550612451621		(X)
2013	Verhofstadt, L. L., & Weytens, F. (2013). Biological sex and gender role identity as predictors of spousal support provision: a scenario-based study. Journal of Gender Studies, 22(2), 166. http://0-dx.doi.org.opac.unicatt.it/10.1080/09589236.2012.745683		X biological sex (male versus female) and X gender identity (masculine versus feminine)
2013	VonDras, D. D., & Madey, S. F. (2013). PERCEIVED SPOUSAL SUPPORT AND ATTAINMENT OF HEALTH GOALS IN LATER-LIFE. International Journal of Psychology Research, 8(1), 21-36. https://0-www-proquest-com.opac.unicatt.it/scholarly-journals/perceived-spousal-support-attainment-health-goals/docview/1625578238/se-2?accountid=9941
2013	Verhofstadt, L. L., Lemmens, G. M. D., & Buysse, A. (2013). Support‐seeking, support‐provision and support‐perception in distressed married couples: A multi‐method analysis. Journal of Family Therapy, 35(3), 320-339. http://0-dx.doi.org.opac.unicatt.it/10.1111/1467-6427.12001
2013	Lister, Z., Fox, C., & Wilson, C. M. (2013). Couples and diabetes: A 30-year narrative review of dyadic relational research. Contemporary Family Therapy: An International Journal, 35(4), 613–638. https://doi.org/10.1007/s10591-013-9250-x
2013	Boerner, K., Carr, D., & Moorman, S. (2013). Family relationships and advance care planning: do supportive and critical relations encourage or hinder planning?. The journals of gerontology. Series B, Psychological sciences and social sciences, 68(2), 246–256. https://doi.org/10.1093/geronb/gbs161
2014	High, A. C., & Steuber, K. R. (2014). An examination of support (in)adequacy: Types, sources, and consequences of social support among infertile women. Communication Monographs, 81(2), 157–178. https://doi.org/10.1080/03637751.2013.878868	301 women coping with infertility. age between 19 and 45 years; average 35 years (SD = 5.60)	(x) female	unspecified (heterosexual?)	X Infertile. Been infertile for approximately six and a half years (M = 6.54)	The majority of the sample was white (84.1%), but it also included participants who were Black (8.6%), Asian (2.7), Hispanic (1%), and multiracial (3.7%)	unspecified	unspecified	unspecified	unspecified	American women	women reported being in a relationship for approximately 9 years (M = 9.40)	(x) 74% of women reported that they had actively tried to become pregnant within the past year
2014	Brock, R. L., & Lawrence, E. (2014). Intrapersonal, interpersonal, and contextual risk factors for overprovision of partner support in marriage. Journal of Family Psychology, 28(1), 54-64. doi:http://0-dx.doi.org.opac.unicatt.it/10.1037/a0035280	103 couples. Husbands’ average age was 25.82 (SD = 3.55), and wives’ average age was 24.78 (SD = 3.67)	X males and females	heterosexual	unspecified	15% of couples identified themselves as ethnic minorities	unspecified	Modal years of education were 14 for both spouses	unspecified	Modal annual joint income ranged from $40,001 to $50,000	Midwest U.S.	(x) First five years of marriage (new couples). Couples dated an average of 44 months (SD = 27) prior to marriage, 76% cohabited premaritally,first marriage	unspecified
2014	Barr, A. B., & Simons, R. L. (2014). A dyadic analysis of relationships and health: Does couple-level context condition partner effects? Journal of Family Psychology, 28(4), 448-459. doi:http://0-dx.doi.org.opac.unicatt.it/10.1037/a0037310	249 dyads X women mean age 23.58 SD 2.17 (19-37); men mean age 25.49, SD 3.92 (18-44)	249 women and 249 men	heterosexual	unspecified	X at least one black partner					Iowa and Georgia U.S.	X black momoracial couples and interracial couples. Mean age 3.30, SD = 1.67
2014	Boeding, S. E., Pukay-Martin, N. D., Baucom, D. H., Porter, L. S., Kirby, J. S., Gremore, T. M., & Keefe, F. J. (2014). Couples and breast cancer: Women’s mood and partners’ marital satisfaction predicting support perception. Journal of Family Psychology, 28(5), 675–683. https://doi.org/10.1037/fam0000019	161 couples confronting early stage breast cancer. They tended to be middle aged; ages ranged from 25 to 82 years old, with a median of 52.5 years old	(X) 161 females	heterosexual	X couples in in which the woman has recived a recent diagnosis of Stage 0 (DCIS), I, II, or IIIa breast cancer, no history of prior breast cancer, and no history of other cancer within the last 5 years (basal cell carcinoma excluded)	Of the 161 women in this study, 85% were White, 10% were Black, 2.5% were Hispanic, and 2.5% were Asian or Pacific Islander	unspecified	The median level of education was 16 years (i.e., college-educated), and the range was 11 to 26 years	unspecified	Participants’ household income ranged from (a) $10,000 to $14,999 to (b) over $250,000, with the median income range being $100,000 to $249,999		currently being married or living with a male partner in a committed relationship for at least 1 year. Women had been married or living together in a committed, heterosexual relationship for 1 to 56 years, with a median of 22 years
2014	Don, B. P., & Mickelson, K. D. (2014). Relationship satisfaction trajectories across the transition to parenthood among low‐risk parents. Journal of Marriage and Family, 76(3), 677–692. https://doi.org/10.1111/jomf.12111	206 first-time parents (103 couples) (X)	(X) 103 fathers and 103 mothers	heterosexual	unspecified	mostly White (88%)	unspecified	(X) college educated (75%)	unspecified	(X) middle to upper income (72.2% of households made $60,000 or more a year)	northeast Ohio U.S.	Couples were either married or cohabiting and, on average, had been married/cohabiting for about 3 years (M = 3.38, SD = 2.16); married (91%)	X new parents: at the third trimester of pregnancy (104 complete couples), 1 month postpartum (93 complete couples), 4 months postpartum (86 complete couples), and 9 months postpartum (83 complete couples)
2014	Ghafari, S., Khoshknab, M. F., Norouzi, K., & Mohamadi, E. (2014). Spousal support as experienced by people with multiple sclerosis: A qualitative study. Journal of Neuroscience Nursing, 46(5), e15–e24. https://doi.org/10.1097/JNN.0000000000000081
2014	McNeil, S. N., Fincham, F. D., & Beach, S. R. H. (2014). Does spousal support moderate the association between perceived racial discrimination and depressive symptoms among African American couples? Family Process, 53(1), 109-119. http://0-dx.doi.org.opac.unicatt.it/10.1111/famp.12054	487 African American heterosexual couples	X male and female	heterosexual		African American
2014	Sofolahan-Oladeinde, Y., & Airhihenbuwa, C. O. (2014). "He doesn't love me less. he loves me more": perceptions of women living with HIV/AIDS of partner support in childbearing decision-making. Health care for women international, 35(7-9), 937–953. https://doi.org/10.1080/07399332.2014.920022	15 women living with HIV/AIDS. Participant age: 5 26–30; 9 31–35; 136–40; Mean (range) 31.9 (28–38 years)	female	heterosexual	X HIV	Nigerian Ethnicity: Yoruba 2; Ibo 9; Ishan 2; Delta Ibo 2	X as shared faith partners: Religion Christianity 15	Education: Primary 1; Secondary 9; Higher 5	Employment status: None 9; Self-employed 4 Employed 2		southwestern Nigeria		X Childbearing
2014	Chung, H., & Epstein, N. B. (2014). Perceived racial discrimination, acculturative stress, and psychological distress among Asian immigrants: The moderating effects of support and interpersonal strain from a partner. International Journal of Intercultural Relations, 42, 129–139. https://doi.org/10.1016/j.ijintrel.2014.04.003
2014	Brock, R. L., & Lawrence, E. (2014). Marital Processes, Neuroticism, and Stress as Risk Factors for Internalizing Symptoms. Couple & family psychology, 3(1), 30–47. https://doi.org/10.1037/cfp0000007
2014	Williams, A. M., & Cano, A. (2014). Spousal mindfulness and social support in couples with chronic pain. The Clinical journal of pain, 30(6), 528–535. https://doi.org/10.1097/AJP.0000000000000009
2014	Krahé, C., Paloyelis, Y., Sambo, C. F., & Fotopoulou, A. (2014). I like it when my partner holds my hand: development of the Responses and Attitudes to Support during Pain questionnaire (RASP). Frontiers in psychology, 5, 1027. https://doi.org/10.3389/fpsyg.2014.01027
2014	Evans, S. E., Steel, A. L., Watkins, L. E., & DiLillo, D. (2014). Childhood exposure to family violence and adult trauma symptoms: The importance of social support from a spouse. Psychological Trauma: Theory, Research, Practice, and Policy, 6(5), 527–536. https://doi.org/10.1037/a0036940
2014	Farooqi, S. R. (2014). The Construct of Relationship Quality. Journal of Relationships Research, 5, 11. http://0-dx.doi.org.opac.unicatt.it/10.1017/jrr.2014.2
2015	Donato, S., Parise, M., Iafrate, R., Bertoni, A., Finkenauer, C., & Bodenmann, G. (2015). Dyadic coping responses and partners’ perceptions for couple satisfaction: An actor–partner interdependence analysis. Journal of Social and Personal Relationships, 32(5), 580–600. https://doi.org/10.1177/0265407514541071	114 premarital contacted at prenuptial courses (X) Participants were generally in their late 20s or early 30s (Men: M = 32.4, SD = 4.6; Women: M= 29.8, SD = 3.9)	X 114 men and 114 women	heterosexual	unspecified	unspecified	(X) Maybe Catholic's couples but 51% of women and 63% of men report to engage in either no or little religious practice	unspecified	unspecified	(X) both men and women reported a modal net household income of about €2500–3000 per month	Norther Italy	Prenuptial couples. 42% of couples were cohabiting before marriage	Most couples were childless: At T1, only 3.5% of couples had children. At T2, 10.4% of the couples had children. At both time points couples who had children had on average 1 child (SD = .00 at T1 and SD = .29 at T2)
2015	Otto, A. K., Laurenceau, J., Siegel, S. D., & Belcher, A. J. (2015). Capitalizing on everyday positive events uniquely predicts daily intimacy and well-being in couples coping with breast cancer. Journal of Family Psychology, 29(1), 69-79. doi:http://0-dx.doi.org.opac.unicatt.it/10.1037/fam0000042	N = 45 couples/90 individuals, couples in which a female patient had been diagnosed with early stage breast cancer. On average, patients were 52.27 years old (SD = 10.43) and spouses were 54.37 years old (SD = 11.94)	All female patients and only 1 female partner; so all heterosexual except one lesbian couples	all heterosexual except one lesbian couples	X couples in which a female patient had been diagnosed with early stage breast cancer (defined as Stage 0 [ductal carcinoma in situ/DCIS], Stage I, Stage II, or Stage IIIA)	The majority of patients and spouses identified as White (85.9% and 86.9%, respectively) and non-Hispanic (96.0% and 98.0%, respectively)	unspecified	Participants tended to be well-educated; of those who reported on educational history, 60.0% of patients and 57.7% of spouses earned at least a bachelor’s degree	Approximately 38.4% of patients reported that they were not currently working, while 26.3% and 35.4% worked part- and full-time, respectively. However, the majority (73.5%) of spouses reported working full-time, with 22.4% not working and 4.1% working part-time	Approximately 72.9% of participants reported an annual family income of over $60,000	mid-Atlantic community cancer center (U.S)	All couples were married with the exception of three couples in committed relationships and three couples that did not report on marital status. Mean relationship length was 25.10 years (SD = 13.29)	unspecified
2015	Sullivan, K. T., Pasch, L. A., Lawrence, E., & Bradbury, T. N. (2015). Physical aggression, compromised social support, and 10-year marital outcomes: Testing a relational spillover model. Journal of Family Psychology, 29(6), 931-937. doi:http://0-dx.doi.org.opac.unicatt.it/10.1037/fam0000125	Newly married couples (N = 172), 344 spouses. Husbands and wives averaged 27.6 (SD = 3.9) and 26 (SD = 3.4) years of age	(X) 172 male and 172 female	heterosexual	unspecified	Race and ethnic background for husbands and wives, respectively, was Caucasian (67% and 61%), Asian American-Pacific Islander (13% and 15%), Latino-Chicano (15% and 16%), African American (4% and 5%), and Middle Eastern (1% and 2%)	unspecified	Husbands and wives averaged 16.2 (SD = 2.0) years of education	unspecified	Husbands’ median annual income ranged from $21,000 to $30,000; wives ranged from $11,000 to $20,000	Race and ethnic background for husbands and wives, respectively, was Caucasian (67% and 61%), Asian American-Pacific Islander (13% and 15%), Latino-Chicano (15% and 16%), African American (4% and 5%), and Middle Eastern (1% and 2%) (U.S.)	(X) Newly married couples. Over the 10 years of the study, (X) 33 couples (19%) divorced	unspecified
2015	Hammond, M. D., & Overall, N. C. (2015). Benevolent Sexism and Support of Romantic Partner’s Goals: Undermining Women’s Competence While Fulfilling Men’s Intimacy Needs. Personality and Social Psychology Bulletin, 41(9), 1180–1194. https://doi.org/10.1177/0146167215593492	100 heterosexual couples. Female participants’ ages (M = 21.97, SD = 5.65) did not differ from male participants’ age (M = 23.31, SD = 7.24, tDiff = −1.46, p = .15)	X 100 husband and 100 wives	heterosexual	unspecified	unspecified	unspecified	unspecified	unspecified	unspecified	New Zealand (Oceania)	50% of the sample were living together or married, and the mean length of relationships was 3.28 years (SD = 4.13 years)	unspecified	x CULTURE: Benevolent Sexism
2015	Bodenmann, G., Meuwly, N., Germann, J., Nussbeck, F. W., Heinrichs, M., & Bradbury, T. N. (2015). Effects of Stress on the Social Support Provided by Men and Women in Intimate Relationships. Psychological Science, 26(10), 1584–1594. https://doi.org/10.1177/0956797615594616
2015	Kamen, C., Mustian, K. M., Heckler, C., Janelsins, M. C., Peppone, L. J., Mohile, S., McMahon, J. M., Lord, R., Flynn, P. J., Weiss, M., Spiegel, D., & Morrow, G. R. (2015). The association between partner support and psychological distress among prostate cancer survivors in a nationwide study. Journal of cancer survivorship : research and practice, 9(3), 492–499. https://doi.org/10.1007/s11764-0…
2015	Ying, L. Y., Wu, L. H., & Loke, A. Y. (2015). The Experience of Chinese Couples Undergoing In Vitro Fertilization Treatment: Perception of the Treatment Process and Partner Support. PloS one, 10(10), e0139691. https://doi.org/10.1371/journal.pone.0139691		12 couples		(X) infertility	(X) chinese					the capital and largest city of the Zhejiang province		X Undergoing In Vitro Fertilization Treatment
2015	Rapee, R. M., Peters, L., Carpenter, L., & Gaston, J. E. (2015). The Yin and Yang of support from significant others: Influence of general social support and partner support of avoidance in the context of treatment for social anxiety disorder. Behaviour research and therapy, 69, 40–47. https://doi.org/10.1016/j.brat.2015.03.012
2015	Gosnell, C. L., & Gable, S. L. (2015). Providing partner support in good times and bad: Providers' outcomes. Family Science, 6(1), 150. https://0-www-proquest-com.opac.unicatt.it/scholarly-journals/providing-partner-support-good-times-bad/docview/1758229282/se-2?accountid=9941
2015	Pereira, M. G., Costa, V., Oliveira, D., Ferreira, G., Pedras, S., Sousa, M. R., & Machado, J. C. (2015). Patients' and Spouses' Contribution Toward Adherence to Self-Care Behaviors in Type 2 Diabetes. Research and theory for nursing practice, 29(4), 276–296. https://doi.org/10.1891/1541-6577.29.4.276
2015	Zak-Hunter, L., & Johnson, L. N. (2015). Exploring the association between partner behaviors and eating disorder symptomology. Families, Systems, & Health, 33(4), 405–409. https://doi.org/10.1037/fsh0000147
2016	Ivanova, K. (2016). Relationship satisfaction of the previously married: The significance of relationship specific costs and rewards in first and repartnering unions. Journal of Social and Personal Relationships, 33(5), 559–580. https://doi.org/10.1177/0265407515583942	3,726 never-married-before and 390 previously married. aged 18-79	60.4% female and 39.6% male	unspecified	unspecified	unspecified	unspecified	unspecified	unspecified	unspecified	Netherlands	X 3,726 never-married-before and 390 previously married. Of those unions, 390 dissolved between the first and third waves: 323 of the never-married-before and 67 of the married before anchors	unspecified
2016	Wilsona, C. L., & Simpson, J. A. (2016). Childbirth pain, attachment orientations, and romantic partner support during labor and delivery. Personal Relationships, 23(4), 622–644. https://doi.org/10.1111/pere.12157	Mothers expecting their first child (N = 140) and their male romantic partners participated in this study. Average ages of women and men were 26.5 years (SD = 4.0) and 28.2 years (SD = 4.2)	140 mothers and 140 fathers	Heterosexual	unspecified	The sample was 80% White, 9% Asian, 7% Hispanic, and 4% Other/Unreported	unspecified	Approximately 72% of women and 73% of men had a bachelor's degree or higher, with 22% of women and 28% of men having a master's or PhD degree	unspecified	Approximately 14% of couples earned annual incomes of less than $25,000, 47% earned $25,000–$54,999, 34% earned $55,000–$99,000, and 5% earned over $100,000	Southwestern city in the United States	The average relationship length was 3.39 years (SD = 2.79) for the married couples (n = 135) and 2.05 years (SD = 2.77) for the unmarried cohabitating couples (n = 5)	Mothers expecting their first child and their male romantic partners
2016	Bar-Kalifa, E., Rafaeli, E., & Sened, H. (2016). Truth and bias in daily judgments of support receipt between romantic partners. Personal Relationships, 23(1), 42–61. https://doi.org/10.1111/pere.12110	80 couples; the mean age was 26.7 (SD = 3.9), for women and 29.3 (SD = 4.4) for men	X 80 males and 80 females	heterosexual?	unspecified	unspecified	unspecified	All participants had completed high school, with an average of 2.5 years (SD = 2.3) of postsecondary education; most (61.6%) had also completed a bachelor's degree.	unspecified	unspecified	Israel	The average relationship duration was 4.6 years (SD = 2.9, range = 1–17 years). The average length of cohabitation was 3.0 years (SD = 2.5, range = 6 months–15 years). Fifty-six couples (70.0%) were married	21 (26.3%) were parents
2016	August, K. J., Abbamonte, J. M., Markey, C. N., Nave, C. S., & Markey, P. M. (2016). Behavioral and emotional responses to diet‐related support and control among same‐sex couples. Personal Relationships, 23(3), 425–440. https://doi.org/10.1111/pere.12134	270 individuals who were members of same-sex couples, with a mean age of 34.56 years (SD = 11.79)	X 72 same-sex male couples couples and 63 same-sex female couples	X gay and lesbian	unspecified	71.2% were non-Hispanic White, 14.2% were Black, 8.6% were Hispanic, and 6% were of other races/ethnicities	unspecified	The sample was primarily composed of individuals with a college degree (68%)	unspecified	unspecified	unspecified (New Jersey?)	relationship for an average of 5.72 years (SD = 6.37 years, range = 0–34 years), and 84% of couples were cohabitating	unspecified
2016	Le, Y., McDaniel, B. T., Leavitt, C. E., & Feinberg, M. E. (2016). Longitudinal associations between relationship quality and coparenting across the transition to parenthood: A dyadic perspective. Journal of Family Psychology, 30(8), 918-926. doi:http://0-dx.doi.org.opac.unicatt.it/10.1037/fam0000217	164 coresident heterosexual couples. Men and women were all 18 years old or older. The mean age of the women and men upon recruitment was 28.33 (SD = 4.93) and 29.76 (SD = 5.58)	(X) 164 male and 164 female	heterosexual	unspecified	The majority of the couples were European American (91% of women and 90% of men)	unspecified	On avarage a well-educated sample, with 85.6% of women and 70.7% of men having completed some postsecondary school education	unspecified	Annual family income ranged from $2,500 to $162,500, with a median income of $65,000 (M = $64,062, SD = $34,372)	U.S.	Coresident couples. 82% percent of couples were married upon enrollment in the study	X Pregnant at T1: pregnancy (average weeks’ gestation = 22.9, SD = 5.3, Time 1)
2016	Reczek, C., & Umberson, D. (2016). Greedy Spouse, Needy Parent: The Marital Dynamics of Gay, Lesbian, and Heterosexual Intergenerational Caregivers. Journal of marriage and the family, 78(4), 957–974. https://doi.org/10.1111/jomf.12318	45 couples, 90 individuals	(X) 45 male and 45 female	X 15 gay male couples, 15 lesbian couples, and 15 heterosexual couples	unspecified	unspecified	unspecified	unspecified	unspecified	unspecified	residents in Massachusetts U.S.	legally married. average relationship duration was 19.60 years for gay men (average age = 50.15), 18.28 years for lesbian women (average age = 50.16), and 23.53 years for heterosexual men and women (average age = 50.24 for women and 50.36 for men in heterosexual marriages)	unspecified
2016	Jakubiak, B. K., & Feeney, B. C. (2016). Daily goal progress is facilitated by spousal support and promotes psychological, physical, and relational well-being throughout adulthood. Journal of personality and social psychology, 111(3), 317–340. https://doi.org/10.1037/pspi0000062
2016	Hartman, S. (2016). The importance of antenatal partner support. Journal of Women's Health, 25(7), 659-661. http://0-dx.doi.org.opac.unicatt.it/10.1089/jwh.2016.5773
2016	Heyes, S. M., Bond, M. J., Harrington, A., & Belan, I. (2016). The relative contributions of function, perceived psychological burden and partner support to cognitive distress in bladder cancer. Psycho-oncology, 25(9), 1043–1049. https://doi.org/10.1002/pon.4054
2016	Hohl, D. H., Knoll, N., Wiedemann, A., Keller, J., Scholz, U., Schrader, M., & Burkert, S. (2016). Enabling or Cultivating? The Role of Prostate Cancer Patients' Received Partner Support and Self-Efficacy in the Maintenance of Pelvic Floor Exercise Following Tumor Surgery. Annals of behavioral medicine : a publication of the Society of Behavioral Medicine, 50(2), 247–258. https://doi.org/10.1007/…
2016	Lee, S. H., & Jung, E. J. (2016). Antenatal Depression among Women of Advanced Maternal Age: Self-Esteem and Spousal Support as Predicting Factors. International Information Institute (Tokyo).Information, 19(12), 5857-5872. https://0-www-proquest-com.opac.unicatt.it/scholarly-journals/antenatal-depression-among-women-advanced/docview/1898622551/se-2?accountid=9941
2016	Michalowski, V. I., Hoppmann, C. A., & Gerstorf, D. (2016). Associations Between Perceived Support in Older Adult Marriages and Dyadic Covariations in Momentary Affect and Aches. The journals of gerontology. Series B, Psychological sciences and social sciences, 71(3), 425–430.
2016	Barger, S. D., & Cribbet, M. R. (2016). Social support sources matter: Increased cellular aging among adults with unsupportive spouses. Biological psychology, 115, 43–49. https://doi.org/10.1016/j.biopsycho.2016.01.003
2016	Luecken, L. J., Jewell, S. L., & MacKinnon, D. P. (2016). Prediction of Postpartum Weight in Low-Income Mexican-Origin Women From Childhood Experiences of Abuse and Family Conflict. Psychosomatic medicine, 78(9), 1104–1113. https://doi.org/10.1097/PSY.0000000000000391		female			X Mexican-Origin				X Low-Income	United States, Baltimore		(X) postpartum period
2016	Eubanks Fleming C. J. (2016). Do as I Say, Not as I Do? An Examination of the Relationship Between Partner Behaviors and Help Seeking for Alcohol Related Issues. Substance use & misuse, 51(9), 1185–1194. https://doi.org/10.3109/10826084.2016.1160933
2016	Heins, M. J., Hopman, E. P., Korevaar, J. C., Schellevis, F. G., Donker, G. A., & Rijken, P. M. (2016). Effect of the partner's health and support on cancer patients' use of general practitioner care. Psycho-oncology, 25(5), 559–566. https://doi.org/10.1002/pon.3963		(X) male and female differences		X cancer
2016	Verhofstadt, L., Devoldre, I., Buysse, A., Stevens, M., Hinnekens, C., Ickes, W., & Davis, M. (2016). The Role of Cognitive and Affective Empathy in Spouses' Support Interactions: An Observational Study. PLoS One, 11(2)http://0-dx.doi.org.opac.unicatt.it/10.1371/journal.pone.0149944
2016	Cho, J., & Kogan, S. M. (2016). Risk and Protective Processes Predicting Rural African American Young Men's Substance Abuse. American journal of community psychology, 58(3-4), 422–433. https://doi.org/10.1002/ajcp.12104	X Young			(X)	X Rural African American
2016	Cohen, K., Capponi, S., Nyamukapa, M., Baxter, J., Crawford, A., & Worly, B. (2016). Partner Involvement During Pregnancy and Maternal Health Behaviors. Maternal and child health journal, 20(11), 2291–2298. https://doi.org/10.1007/s10995-016-2048-3
2016	Simon, R. M., Johnson, K. M., & Liddell, J. (2016). Amount, Source, and Quality of Support as Predictors of Women's Birth Evaluations. Birth, 43(3), 226-232. http://0-dx.doi.org.opac.unicatt.it/10.1111/birt.12227
2017	Helgeson, V. S., Jakubiak, B., Seltman, H., Hausmann, L., & Korytkowski, M. (2017). Implicit and explicit communal coping in couples with recently diagnosed type 2 diabetes. Journal of Social and Personal Relationships, 34(7), 1099–1121. https://doi.org/10.1177/0265407516669604	70 couples in which one person had been diagnosed with diabetes on average 1.4 years ago (standard deviation [SD] = 1.1). Average age was 54.6 years for patients (SD = 9.8) and 55.6 years for partners (SD = 9.9)	(X)	99% were heterosexual (one lesbian couple)	(x) 70 couples in which one member was recently diagnosed with type 2 diabetes	34 both White, 9 White patient with Black/other race partner, 20 both Black, and 7 Black patient with White/other race partner	unspecified	Median education category for both patients and partners was some college (10% of both patients and partners graduated college)	unspecified	unspecified		Relationship length ranged from 15 months to 47 years, with a mean of 18.5 years.	unspecified
2017	Ellis, L., & Davis, M. (2017). Intimate partner support: A comparison of gay, lesbian, and heterosexual relationships. Personal Relationships, 24(2), 350–369. https://doi.org/10.1111/pere.12186	624 individuals; The age range of participants was 16–84 years, with a mean of 38.03 (SD = 15.83)	X (did not ask about biological sex), 273 identified themselves as men, 351 as women, and 13 offered some other gender description,(i.e. genderqueer, bigender, or transgender). The 13 people who identified not binary gender (i.e., male or female) were not included in analysis	X MRW (n = 182), MRM (n = 91), (c) WRM (n = 231), and (d) WRW (n = 120). (M = male; F = Female; R = in a reltionship with)	unspecified	85% of the participants were White, 4% identified as Hispanic, 3% as Asian or Pacific Islander, 2% as Black, and 2% as Native American; 4% preferred not to answer	unspecified	The sample was highly educated: 35% bachelor's degree, 30% further postgraduate higher education. 2/3 of the sample had a college degree or higher. In addition, 13% having an associate's degree or trade school, and 23% graduating from high school or secondary school or getting a General Education Diploma (GED). An additional 1% preferred not to answer	unspecified	unspecified	Most of the sample was from the United States (84%) and Canada (6%)	Roughly one fourth of those in same-sex relationships were married (25.7%), as were almost half of those in opposite-sex relationships (48.3%). However, about the same percentage of same-sex and opposite-sex couples lived together (77.0% and 70.5%, respectively)	unspecified
2017	Murphy, S. E., Gallegos, M. I., Jacobvitz, D. B., & Hazen, N. L. (2017). Coparenting dynamics: Mothers' and fathers' differential support and involvement. Personal Relationships, 24(4), 917–932. https://doi.org/10.1111/pere.12221	125 families: Mothers' age at the time of recruitment ranged from 16 to 42 (M = 29), and fathers' age ranged from 19 to 50 (M = 31)	125 fathers and 125 mothers	heterosexual	unspecified	White (84%), Hispanic (8%), African American (2%), or biracial or of another ethnicity (6%)	unspecified	9% of the mothers and 8% of the fathers earned a high school degree, 25% of the mothers and 34% of the fathers had some training beyond high school but did not graduate from college, 46% of the mothers and 38% of the fathers earned a bachelor degree, and 18% of the mothers and 17% of the fathers had a graduate or postcollege degree.	unspecified	Median income for the sample was $30,000 – $44,999. Of the 125 families in the sample, 17% earned less than $30,000, 24.3% earned $30,000–$45,000, 27.1% earned $45,000–$60,000, and 31.4% earned over $60,000	Southwestern U.S.	unspecified	(X) children 24 months old
2017	Hardesty, J. L., Ogolsky, B. G., Raffaelli, M., Whittaker, A., Crossman, K. A., Haselschwerdt, M. L., et al. (2017). Coparenting relationship trajectories: Marital violence linked to change and variability after separation. Journal of Family Psychology, 31(7), 844-854. doi:http://0-dx.doi.org.opac.unicatt.it/10.1037/fam0000323	Women named in a divorce filing within the past 12 weeks, mothers were between ages 20.83 and 53.92 years (M = 35.22, SD = 7.02)	female	unspecified	unspecified	predominantly White (n = 103, 76.3%); 18 mothers (13.3%) identified as Black/African American, 6 (4.4%) as Asian/Asian American, 5 (3.7%) as biracial, and 3 (2.2%) as Latino/Hispanic	unspecified	about half were college graduates (31.9% bachelor’s degree and 17.8% at least some graduate education); the remainder had some college (including an associate’s degree, 38.5%) or a high school education or less (11.1%)	The majority of mothers were employed full time (59.3%)	unspecified	Midwest county (U.S)	X On average, mothers had been married nearly 10 years (SD = 6.01; range = 0.42 – 27.92 years) and had been separated 8 months (SD = 6.37; range <1 – 27 months) (X) some of them has experienced intimate partner violence	at least one child under age 18 with their former partner, had custody of their child(ren) at least 25% of the time
2017	Marshall, E. M., Kuijer, R. G., Simpson, J. A., & Szepsenwol, O. (2017). Standing on shaky ground? dyadic and longitudinal associations between posttraumatic stress and relationship quality postearthquake. Journal of Family Psychology, 31(6), 721-733. doi:http://0-dx.doi.org.opac.unicatt.it/10.1037/fam0000305	99 couples living in Canterbury, New Zealand, partners in each relationship had to be living together since the first earthquake. Men were 42 years old on average (SD = 13) and women averaged 40 years old (SD = 13)	99 male and 99 female	heterosexual	(X) Posttraumatic stress symptoms	Participants were predominantly of New Zealand European descent (95% women, 98% men)	unspecified	educated beyond the high school level (9% women and 6% men had no formal qualification; 19% women and 31% men had a secondary/high school qualification; 72% women and 63% men had a post–high school qualification)	unspecified	had a household income of NZ$50,000 or higher (72%)	(X) Canterbury (South Island of New Zealand) involved in the earthquakes	All of them were married or in de facto relationships and had been together for 15 years on average (SD = 13)	Most of the sample had one or more children (78% for women, 76% for men)
2017	Don, B. P., & Hammond, M. D. (2017). Social Support in Intimate Relationships: The Role of Relationship Autonomy. Personality and Social Psychology Bulletin, 43(8), 1112–1124. https://doi.org/10.1177/0146167217705119	80 romantic couples. Mean age = 20.12, SD = 3.85, range = 18-46	(x) 79 men, 81 women	unspecified	unspecified	The majority of the sample identified as Caucasian (81.9%), 10.6% as African American, 1.9% as Latino or Hispanic, 3.1% as Asian, and 2.5% of the sample as another race/ethnicity	unspecified	unspecified	unspecified	unspecified	Midwest of the United States	being in a committed, monogamous relationship for at least 3 months (Mlength = 1.57 years, SD = 1.82)	unspecified
2017	Lüscher, J. & Scholz, U., (2017) Does social support predict smoking abstinence in dual-smoker couples? Evidence from a dyadic approach, Anxiety, Stress & Coping, 30:3, 273-281, DOI: 10.1080/10615806.2016.1270448	77 dual-smoker couples; The mean age of male partners was M = 40.7 (SD = 14.51) ranging from 20 to 71 years and the mean age of female partners was M = 38.5 (SD = 14.64) ranging from 19 to 68 years	(X) 77 male and 77 female	heterosexual	unspecified	unspecified	unspecified	Most participants reported having attended 9 years of school (women: 63.5%; men: 76.5%)	Most participants were currently employed (women: 61.4%; men: 71.8%)	unspecified	Zurich (CH)	Average relationship duration was M = 12.68, SD = 12.79 (range = 1–47 years). A total of 38 (44.7%) of the couples were married	24 (28.2%) had children	? (X) dual smokers
2017	Porter, E., & Chambless, D. L. (2017). Social anxiety and social support in romantic relationships. Behavior Therapy, 48(3), 335-348. doi:http://0-dx.doi.org.opac.unicatt.it/10.1016/j.beth.2016.12.002
2017	Lavenda, O., & Kestler-Peleg, M. (2017). Parental self-efficacy mitigates the association between low spousal support and stress. Psychiatry research, 256, 228–230. https://doi.org/10.1016/j.psychres.2017.06.060
2017	Aydogan, D., & Kizildag, S. (2017). Examination of relational resilience with couple burnout and spousal support in families with a disabled child. The Family Journal, 25(4), 407-413. http://0-dx.doi.org.opac.unicatt.it/10.1177/1066480717731215
2017	Vanderdrift, L. E., Ioerger, M., Mitzel, L. D., & Vanable, P. A. (2017). Partner Support, Willingness to Sacrifice, and HIV Medication Self-Efficacy. AIDS and Behavior, 21(8), 2519-2525. http://0-dx.doi.org.opac.unicatt.it/10.1007/s10461-017-1698-5
2017	Davey-Rothwell, M., Stewart, J., Vadnais, A., Braxton, S. A., & Latkin, C. A. (2017). The role of partner support among women with depressive symptoms. Community Mental Health Journal, 53(4), 415-419. http://0-dx.doi.org.opac.unicatt.it/10.1007/s10597-017-0101-3
2017	Ilska, M., & Przybyła-Basista, H. (2017). Partner support as a mediator of the relationship between prenatal concerns and psychological well-being in pregnant women. Health Psychology Report, 5(4), 285–295. https://doi.org/10.5114/hpr.2017.68235
2017	Watcharakitippong, J., Blauw, J., & Tuicomepee, A. (2017). Relationships among Perceived Stress, Spousal Support, Emotion Regulation, Subjective Well-Being, and Marital Satisfaction of Thai First-Time Parents. Scholar, 9(2) https://0-www-proquest-com.opac.unicatt.it/scholarly-journals/relationships-among-perceived-stress-spousal/docview/2384108686/se-2?accountid=9941
2017	Uysal, A., Ascigil, E., & Turunc, G. (2017). Spousal autonomy support, need satisfaction, and well-being in individuals with chronic pain: A longitudinal study. Journal of behavioral medicine, 40(2), 281–292. https://doi.org/10.1007/s10865-016-9783-1
2017	Szwedo, D. E., Hessel, E. T., & Allen, J. P. (2017). Supportive Romantic Relationships as Predictors of Resilience Against Early Adolescent Maternal Negativity. Journal of youth and adolescence, 46(2), 454–465. https://doi.org/10.1007/s10964-016-0507-1
2017	Trief, P. M., Jiang, Y., Beck, R., Huckfeldt, P. J., Knight, T., Miller, K. M., & Weinstock, R. S. (2017). Adults with type 1 diabetes: Partner relationships and outcomes. Journal of health psychology, 22(4), 446–456. https://doi.org/10.1177/1359105315605654
2017	Palmer-Wackerly, A. L., Krieger, J. L., & Rhodes, N. D. (2017). The Role of Health Care Provider and Partner Decisional Support in Patients' Cancer Treatment Decision-Making Satisfaction. Journal of health communication, 22(1), 10–19. https://doi.org/10.1080/10810730.2016.1245804
2017	Lüscher, J., Stadler, G., & Scholz, U. (2017). A Daily Diary Study of Joint Quit Attempts by Dual-Smoker Couples: The Role of Received and Provided Social Support. Nicotine & tobacco research : official journal of the Society for Research on Nicotine and Tobacco, 20(1), 100–107. https://doi.org/10.1093/ntr/ntx079
2018	Hsieh, N., & Hawkley, L. (2018). Loneliness in the older adult marriage: Associations with dyadic aversion, indifference, and ambivalence. Journal of Social and Personal Relationships, 35(10), 1319–1339. https://doi.org/10.1177/0265407517712480	953 heterosexual couples (1,906 husbands and wives) X Women M age = 67.60, SD = 0.35; Man M age = 71.11, SD = 0.33	X 953 husbands and 953 wives	heterosexual	unspecified	X Women: white = 83.79%, Black = 6.34%, Hispanic = 7.39% others = 2.48%. Men: white = 83.90%, Black = 6.31%, Hispanic = 7.42% others = 2.37%	unspecified	Women: <HS = 10.79%. HS/equivalent = 24.86%; Some college/Ass. degree 39.74%; Bachelor's or more =24.62%. Men: <HS = 14.83%. HS/equivalent = 23.38%; Some college/Ass. degree 26.49%; Bachelor's or more =35.31%	unspecified	Women: <25k = 15.11%, 25-50k = 27.28, 50-100k = 35.24%, >100k = 22.37%; Men: <25k = 14.04%, 25-50k = 26.97, 50-100k = 35.31%, >100k = 22.48%	U.S	unspecified	unspecified
2018	Shenkman, G. (2018). The association between basic need satisfaction in relationship and personal growth among lesbian and heterosexual mothers. Journal of Social and Personal Relationships, 35(2), 246–262. https://doi.org/10.1177/0265407516681192	57 lesbian (Mean age = 37.05; SD = 5.37) mothers and 57 heterosexual mothers (Mean age = 36.98; SD = 5.42)	female	X 57 lesbian and 57 heterosexual	unspecified	Place of birth: Lesbian = 91.2% Israel, 8.8% elsewhere; Heterosexual = 86% Israel, 14% elsewhere	modal: Secular; Familisy's modal religion Jewish	modal Bachelor of Arts for both groups	unspecified	Modal: avarage	Israel		(x) mothers
2018	Smith, R. A., Sillars, A., Chesnut, R. P., & Zhu, X. (2018). Investigating married adults’ communal coping with genetic health risk and perceived discrimination. Communication Monographs, 85(2), 181–202. https://doi.org/10.1080/03637751.2017.1404618	married adults (N = 266, 133 couples), in which one person had the genetic risk for serious illness. (X) who were 21 years of age or older	(X) Half were male and half were female (two participants did not answer)	98% of the couples were heterosexual	X one person of the couples has alpha-1 antitrypsin deficiency (AATD), an inherited, monogenic disorder associated with adult-onset lung and liver disease, including being asymptomatic (59%), or having one (13%), two (19%), three (5%), or four (4%) indicators of disease progression	most were White (96%)	unspecified	unspecified	unspecified	unspecified	South Carolina (U.S.)	married	unspecified
2018	Boyers, G. B., & Simpson Rowe, L. (2018). Social support and relationship satisfaction in bipolar disorder. Journal of Family Psychology, 32(4), 538-543. doi:http://0-dx.doi.org.opac.unicatt.it/10.1037/fam0000400	38 individuals with a lifetime diagnosis of bipolar I (90%) or bipolar II (10%) disorder and their opposite sex partners. Participants mean age of 44 (25-64) years (SD = 10) for patients and 46 years (SD = 11) for partners	71% of cases, the individual with bipolar disorder (hereafter referred to as the patient) was female	heterosexual	X diagnosis of bipolar I (90%) or bipolar II (10%) disorder	predominantly non-Hispanic White (92% of patients, 84% of partners), with the remainder identifying as Hispanic of any race (5% of patients and 8% of partners) or other (3% of patients, 8% of partners)	unspecified	Participants had 15 years of education on average (SD = 3 years)	50% of patients and 76% of partners were employed	median household income of $4,500 per month	unspecified	All couples had been living together for at least 1 year, with an average relationship length of 12 years (SD = 10), and 84% were married	In 76% of couples, at least one partner had a biological child (children’s age ranged from 1 to 41 years), with a mean of 2.86 children (SD = 1.66) among couples who had children
2018	Girme, Y. U., Maniaci, M. R., Reis, H. T., McNulty, J. K., Carmichael, C. L., Gable, S. L., et al. (2018). Does support need to be seen? daily invisible support promotes next day relationship well-being. Journal of Family Psychology, 32(7), 882-893. doi:http://0-dx.doi.org.opac.unicatt.it/10.1037/fam0000453		(X)
2018	Riina, E. M., & Feinberg, M. E. (2018). The trajectory of coparenting relationship quality across early adolescence: Family, community, and parent gender influences. Journal of Family Psychology, 32(5), 599-609. doi:http://0-dx.doi.org.opac.unicatt.it/10.1037/fam0000426	433 families	(x) 433 fathers and 433 mothers	heterosexual	unspecified	89% non hipanic white, 6% african american, 2% latino-hispanic	unspecified	55% mothers >HS; 38% fathers >HS	(x) dual earner/work hours	(x) financial strain	28 rural and small town communities, 14 each in Pennsylvania and Iowa		(x) youth ages
2018	Helgeson, V. S., Jakubiak, B., Van Vleet, M., & Zajdel, M. (2018). Communal Coping and Adjustment to Chronic Illness: Theory Update and Evidence. Personality and social psychology review : an official journal of the Society for Personality and Social Psychology, Inc, 22(2), 170–195. https://doi.org/10.1177/1088868317735767				X Chronic Illness
2018	Emery, L. F., Gardner, W. L., Finkel, E. J., & Carswell, K. L. (2018). “You’ve Changed”: Low Self-Concept Clarity Predicts Lack of Support for Partner Change. Personality and Social Psychology Bulletin, 44(3), 318–331. https://doi.org/10.1177/0146167217739263													not intersectional
2018	Lorenzo, J. M., Barry, R. A., & Khalifian, C. E. (2018). More or less: Newlyweds’ preferred and received social support, affect, and relationship satisfaction. Journal of Family Psychology, 32(7), 860-872. http://0-dx.doi.org.opac.unicatt.it/10.1037/fam0000440
2018	Elegbede, P. T., & Ogunleye, A. J. (2018). EMOTIONAL CONTROL, SELF-EFFICACY AND SOCIAL SUPPORT AS PREDICTORS OF INTIMATE RELATIONSHIP SATISFACTION AMONG DATING PARTNERS. Ife Psychologia, 26(1), 154-169. https://0-www-proquest-com.opac.unicatt.it/scholarly-journals/emotional-control-self-efficacy-social-support-as/docview/2092812329/se-2?accountid=9941
2018	Boyers, G. B., & Simpson Rowe, L. (2018). Social support and relationship satisfaction in bipolar disorder. Journal of Family Psychology, 32(4), 538-543. doi:http://0-dx.doi.org.opac.unicatt.it/10.1037/fam0000400
2018	Pow, J., Stephenson, E., Hagedoorn, M., & DeLongis, A. (2018). Spousal support for patients with rheumatoid arthritis: Getting the wrong kind is a pain. Frontiers in Psychology, 9, 11. http://0-dx.doi.org.opac.unicatt.it/10.3389/fpsyg.2018.01760				x
2018	Kaliampos, A., & Roussi, P. (2018). Quality of partner support moderates positive affect in patients with cancer. Psycho-oncology, 27(4), 1298–1304. https://doi.org/10.1002/pon.4672
2018	Olson, J. R., Welsh, J. A., Perkins, D. F., & Ormsby, L. (2018). Individual, family, and community predictors of PTSD symptoms following military deployment. Family Relations: An Interdisciplinary Journal of Applied Family Studies, 67(5), 615–629. https://doi.org/10.1111/fare.12343				X PTSD Symptoms				X Military Deployment	X Financial resources on degree to which they have enough financial resources to cover living expenses
2018	Ondenge, K., Odero, I., Awuonda, E., Omoro, T., Kibogo, M., Otieno, G., Ongwena, P., & Gust, D. A. (2018). Community perceptions and personal accounts of HIV discordance in rural western Kenya. African journal of AIDS research : AJAR, 17(3), 281–290. https://doi.org/10.2989/16085906.2018.1521851		X gender differences in the perceived level of support given the HIV-infected partner by the HIV-uninfected partner		X HIV seroconcordant and serodiscordant couples						X Asembo and Karemo regions within Siaya county, Kenya
2018	Ogbo, F. A., Kingsley Ezeh, O., Dhami, M. V., Naz, S., Khanlari, S., McKenzie, A., Agho, K., Page, A., Ussher, J., Perz, J., & Eastwood, J. (2019). Perinatal Distress and Depression in Culturally and Linguistically Diverse (CALD) Australian Women: The Role of Psychosocial and Obstetric Factors. International journal of environmental research and public health, 16(16), 2945. https://doi.org/10.339…	(X) age (categorised as <20, 20–34, or ≥35 years)				(X) major nationality groups based on the country of birth (categorised as Oceania, North-West Europe, Southern-Eastern Europe, North Africa and the Middle East, South-East Asia, North-East Asia, Southern and Central Asia, Americas or Sub-Saharan Africa)				(X) socioeconomic status (categorised as low, middle or high)	Australia
2019	Dailey, R. M. (2019). Integrating strategies from three predominant theories regarding romantic partner support of weight loss. Journal of Social and Personal Relationships, 36(10), 3009–3036. https://doi.org/10.1177/0265407518810528	Individuals actively trying to lose weight, with a BMI of over 25 (overweight), cohabiting with their romantic partner, 18 years of age or old. Study 1: 200 individuals age from 18 to 72 (M = 35.63); study 2: 298 individualsranged in age from 19 to 73 (M = 35.57, SD = 10.75)	Study 1: male (n = 104, 52.8%) female (n = 96, 48.2%) ; Study 2: female (n = 189, 63.4%) male (109, 46.37%)	Study 1: Most were in heterosexual relationships 75.5%; 29 (14.5%) were in male same-sex relationships and 20 (10.0%) were in female same-sex relationships. Study 2: Most were in heterosexual relationships 90.2%; 18 (6.3%) were in female same-sex relationships, and 10 (3.5%) were in male same-sex relationships.	(X) BMI of over 25 (i.e., the classification for overweight). Study 1: The BMIs of participants ranged from 25.06 to 56.69 and averaged 32.19 (SD = 5.69; Mdn = 30.54). Study 2: The BMIs of participants ranged from 25.01 to 83.20 and averaged 33.23 (SD = 7.76; Mdn = 31.16)	Study 1: Caucasian (n = 155, 77.5%), Hispanic or Latino/a (n = 8, 4.0%), Asian (n = 11, 5.5%), African American/Black (n = 14, 7.0%), 9 different or multiple ethnicities; 3 not reported; Study 2: Participant ethnicities included Caucasian (n = 216, 72.5%), Hispanic or Latino/a (n = 17, 5.7%), Asian (n = 17, 5.7%), African American/Black (n = 21, 7.0%), and 18 different or multiple ethnicities; 7 …	unspecified	unspecified	unspecified	unspecified	Study 1: Participants also lived in 40 different states across the U.S.; Study 2: Participants also lived in 48 different states across the U.S.	Study 1: Half of the sample was married (n = 98, 49.0%); the remaining were dating (n = 35, 17.5%), engaged (n = 19, 9.5%), or in a long-term, committed relationship (n = 44, 22.0%); four declined to respond to this question. Study 2: Half of the sample was married (n = 164, 55.0%); the remaining were dating (n = 34, 11.4%), engaged (n = 25, 8.4%), or in a long-term, committed relationship (n = 6…	unspecified
2019	Hofsöe, S. M., Lehane, C. M., Wittich, W., Hilpert, P., & Dammeyer, J. (2019). Interpersonal communication and psychological well-being among couples coping with sensory loss: The mediating role of perceived spouse support. Journal of Social and Personal Relationships, 36(8), 2323–2344. https://doi.org/10.1177/0265407518787933	206 participants (103 couples)			X Adults living with hearing, vision, or dual sensory loss and their spouses were recruited for this study
2019	Lee, K., Martin, P. (2019). Who gives and receives more? Older couples’ personality and spousal support. Personal Relationships, 26(3), 429–447. https://doi.org/10.1111/pere.12290	X 1,775 married or partnered dyads (n = 3,550) whose ages were between 50 and 85 years. Age: Husbands M=68.11SD=8.73; Wives M=65.20, SD=8.37	X 1,775 husband and 1,775 wives	heterosexual	Medical condition (%): Husbands=18.20; Wives=15.70	White (%): Husbands=81.00; Wives=81.70	unspecified	Education years: husbands M=13.12. SD=3.20; wives M=13.16, SD=2.85	(x) Working for pay (%) husbands=41.70, wives=39.00	(x) Household income ($1,000): husbands M=89.88 SD=103.92; wives M & SD unspecified	United States	Years of marriage: husbands M=36.44, SD=15.85; wives M=36.25, SD=15.96	unspecified
2019	Casu, G., Zaia, V., Fernandes Martins, M., Parente Barbosa, C., & Gremigni, P. (2019). A dyadic mediation study on social support, coping, and stress among couples starting fertility treatment. Journal of family psychology : JFP : journal of the Division of Family Psychology of the American Psychological Association (Division 43), 33(3), 315–326. https://doi.org/10.1037/fam0000502	201 infertile couples (402 participants). Mean age was 36.22 years (SD = 4.33; range 24–52 years) for women and 38.32 years (SD = 6.66; range 23–63 years) for men	(X) 201 women and 201 men	heterosexual	X infertile couples starting ART treatment at a private fertility clinic	unspecified	unspecified	Sixty-seven percent of women (n = 135) and 53.7% of men (n = 108) had tertiary education	unspecified	unspecified	São Paulo, Brazil	Couples were married or living together for approximately eight years (M = 7.56, SD = 4.57, range 1–30 years)	unspecified
2019	South, S. C., Lim, E., Jarnecke, A. M., & Foli, K. J. (2019). Relationship quality from pre- to postplacement in adoptive couples. Journal of Family Psychology, 33(1), 64-76. doi:http://0-dx.doi.org.opac.unicatt.it/10.1037/fam0000456South, S. C., Lim, E., Jarnecke, A. M., & Foli, K. J. (2019). Relationship quality from pre- to postplacement in adoptive couples. Journal of Family Psychology, 33(1)…	127 adoptive parents	unspecified	125 heterosexual, 2 same-sex	unspecified	primarily Caucasian	unspecified	well-educated	unspecified	reported relatively high incomes		X Adoptive parents; A majority of the families in the sample (47%) completed an intercountry adoption, with 32% reporting that adoption type was private domestic, 11% reporting public domestic, and 10% reporting “other.” Average relationship length for married and partnered couples was 13.3 (SD = 5.64) years at T1	average age of the adopted child was 28.1 months (SD = 38.3). Prior to placement of the current adopted child, 18 couples had no children in the home, 18 families reported having one child in the home, 26 families had two or more children in the home, and six families did not report. Five couples adopted two children at the same time and one couple adopted three children at the same time
2019	Don, B. P., Girme, Y. U., & Hammond, M. D. (2019). Low Self-Esteem Predicts Indirect Support Seeking and Its Relationship Consequences in Intimate Relationships. Personality and Social Psychology Bulletin, 45(7), 1028–1041. https://doi.org/10.1177/0146167218802837	76 couples couples. Participants were a mean age of 20.12 years (SD = 3.93 years)	(X) 76 male and 76 female	heterosexual				The majority of the sample identified as White (82.8%, African American = 10.5%, Latino/Hispanic = 1.3%, Asian = 2.6%, Other ethnicity = 2.6%)				in a committed, monogamous relationship for at least 3 months prior. an average relationship length of 1.53 years (SD = 1.80 years)
2019	Don, B. P., Girme, Y. U., & Hammond, M. D. (2019). Low Self-Esteem Predicts Indirect Support Seeking and Its Relationship Consequences in Intimate Relationships. Personality & social psychology bulletin, 45(7), 1028–1041. https://doi.org/10.1177/0146167218802837
2019	Rasool, I., Zubair, A., & Anwar, M. (2019). Role of perceived self-efficacy and spousal support in psychological well-being of female entrepreneurs. Pakistan Journal of Psychological Research, 34(4), 899-917. http://0-dx.doi.org.opac.unicatt.it/10.33824/PJPR.2019.34.4.48	female entrepreneurs (N = 405) with age range of 22-49 years (M = 33.96, SD = 8.50)	X female					X Educational level of the participants ranged from matric to post-graduation; while spousal (husband’s) education ranged from intermediate to post-graduation	X entrepreneurs doing businesses at their homes. Respondents had four types of entrepreneurship including beauty salons (n = 110), boutiques (n = 102), coaching centers (n = 113), and school canteens (n = 80)	belonged to dual earner families with average monthly income PKR. 35,000	Pakistan	marital duration of minimum one year	age of the youngest child was at least one year
2019	Albanese, A. M., Huffman, J. C., Celano, C. M., Malloy, L. M., Wexler, D. J., Freedman, M. E., & Millstein, R. A. (2019). The role of spousal support for dietary adherence among type 2 diabetes patients: A narrative review. Social Work in Health Care, 58(3), 304-323. http://0-dx.doi.org.opac.unicatt.it/10.1080/00981389.2018.1563846		X		X	X
2019	Hung, M., Voss, M. W., Bounsanga, J., Graff, T., & Birmingham, W. C. (2019). Assessing spousal support and health in an aging population: Support and strain amidst changing social dynamics. Social Work in Health Care, 58(4), 345-367. http://0-dx.doi.org.opac.unicatt.it/10.1080/00981389.2019.1569577
2019	Kirova, K., & Snell, T. (2019). Women’s experiences of positive postnatal partner support. Journal of Reproductive and Infant Psychology, 37(2), 206-218. http://0-dx.doi.org.opac.unicatt.it/10.1080/02646838.2018.1542120
2019	Gillis, A., Gabriel, B., Galdiolo, S., & Roskam, I. (2019). Partner Support as a Protection Against Distress During the Transition to Parenthood. Journal of Family Issues, 40(9), 1107–1125. https://doi.org/10.1177/0192513X19832933
2019	Varner, S., Lloyd, G., Ranby, K. W., Callan, S., Robertson, C., & Lipkus, I. M. (2019). Illness uncertainty, partner support, and quality of life: A dyadic longitudinal investigation of couples facing prostate cancer. Psycho-oncology, 28(11), 2188–2194. https://doi.org/10.1002/pon.5205
2019	Galbally, M., Watson, S. J., Boyce, P., & Lewis, A. J. (2019). The role of trauma and partner support in perinatal depression and parenting stress: An Australian pregnancy cohort study. The International journal of social psychiatry, 65(3), 225–234. https://doi.org/10.1177/0020764019838307
2019	Leong Abdullah, M., Hami, R., Appalanaido, G. K., Azman, N., Mohd Shariff, N., & Md Sharif, S. S. (2019). Diagnosis of cancer is not a death sentence: Examining posttraumatic growth and its associated factors in cancer patients. Journal of psychosocial oncology, 37(5), 636–651. https://doi.org/10.1080/07347332.2019.1574946
2019	Donnelly, R., Robinson, B. A., & Umberson, D. (2019). Can Spouses Buffer the Impact of Discrimination on Depressive Symptoms? An Examination of Same-sex and Different-sex Marriages. Society and mental health, 9(2), 192–210. https://doi.org/10.1177/2156869318800157
2019	Leifker, F. R., & Marshall, A. D. (2019). The impact of negative attributions on the link between observed partner social support and posttraumatic stress disorder symptom severity. Journal of anxiety disorders, 65, 19–25. https://doi.org/10.1016/j.janxdis.2019.05.002
2019	Windle, M., & Windle, R. C. (2019). Partner Conflict and Support as Moderators of Alcohol Use on Alcohol Problems and Marital Satisfaction in Young Adult Marital Dyads. Alcoholism, clinical and experimental research, 43(4), 668–678. https://doi.org/10.1111/acer.13977
2019	Kreuder, A. K., Wassermann, L., Wollseifer, M., Ditzen, B., Eckstein, M., Stoffel-Wagner, B., Hennig, J., Hurlemann, R., & Scheele, D. (2019). Oxytocin enhances the pain-relieving effects of social support in romantic couples. Human brain mapping, 40(1), 242–251. https://doi.org/10.1002/hbm.24368
2019	Yang, T. C., & Park, K. (2019). Racial/ethnic disparities in depression: Investigating how sources of support and types of integration matter. Social science research, 82, 59–71. https://doi.org/10.1016/j.ssresearch.2019.04.002	(X)	(X) male and female		(X) depressive symptoms	X Whites, Blacks, Hispanics		(X)		(X)	U.S.
2019	Wooldridge, J. S., & Ranby, K. W. (2019). Influence of Relationship Partners on Self-Efficacy for Self-Management Behaviors Among Adults With Type 2 Diabetes. Diabetes spectrum : a publication of the American Diabetes Association, 32(1), 6–15. https://doi.org/10.2337/ds17-0069
2020	River, L. M., Narayan, A. J., Atzl, V. M., Rivera, L. M., & Lieberman, A. F. (2020). Romantic partner support during pregnancy: The discrepancy between self-reported and coder-rated support as a risk factor for prenatal psychopathology and stress. Journal of Social and Personal Relationships, 37(1), 27–46. https://doi.org/10.1177/0265407519850333	101 pregnant women at least 18 years old (M age = 29.10, SD age = 6.56), English- or Spanish-speaking (26% Spanish)	101 mothers assessing their baby's fathers support	unspecified	unspecified	(X) 37% Latina, 22% African American, 20% White, 14% biracial or multiracial, 7% Asian American, 1% American Indian. Analyzex separetde from english and spanish speaking	unspecified	an average of 12.62 years of education (SD years = 2.56, range = 5–21)	unspecified	(x) Women were low-income (70% lived below the federal poverty line)	U.S.	(x) The majority of women were presently romantically involved with the baby’s father (75%; n = 76). Only four women (4%) reported a current romantic relationship during pregnancy with someone other than the baby’s biological father	X in their second or third trimesters of pregnancy (range: 13–41 weeks gestation; M weeks = 28.09, SD weeks = 7.65), and planning to deliver at a large urban hospital that serves predominantly low-income families. For most women (79%), this was not their first pregnancy
2020	Calkins, F. C., & Brock, R. L. (2020). The dark side of helping behaviors: Partner support increases daily alcohol use in outpatients with a history of alcohol dependence. Journal of Social and Personal Relationships, 37(5), 1389–1404. https://doi.org/10.1177/0265407519898257	59 outpatients in a committed relationship lasting at least 6 months and currently cohabiting with their partner, over the age of 18, and not actively psychotic	42 females, 17 males	unspecified	X treatment-seeking individuals with a history of alcohol dependence. Almost all participants (91.5%) met either current or past diagnostic criteria for a mood, anxiety, or alcohol use disorder. In most cases, individuals met criteria for more than one disorder	primarily White (84.5%)	unspecified	unspecified	primarily unemployed (56.9%)	(X) modal income of less than US$10,000	U.S.	Over half of the sample were cohabiting with their partners but were not engaged or married (51.8%). Average length of the intimate relationship was 91.93 months (SD = 83.28), and almost half of the sample had separated from their partner at some point in the relationship (42.1%)	the majority of participants had children (56.9%)
2020	George-Levi, S., Peleg, S., Vilchinsky, N., Rafaeli, E., Khaskiaa, A., Mosseri, M., & Hod, H. (2020). Attachment insecurity hinders cardiac patients’ ability to receive partners’ care: A longitudinal dyadic study. Journal of Social and Personal Relationships, 37(5), 1494–1512. https://doi.org/10.1177/0265407519900998	114 couples coping with one partner’s acute coronary syndrome. Patients over 75 years of age, diagnosis other than ACS (i.e., other than MI or UA), had comorbid conditions (e.g., psychiatric illness, neoplasia). Patients M age = 56.17 SD = 8.15; Partners M age = 52.72 SD = 8.49;	(x) men diagnosed with their first ACS and their partners	unspecified	X Diagnosed with their first acute coronary syndrome and without comorbidity	Hebrewx	unspecified	patients: M year = 14.00 SD = 3.30; partners M year = 14.63 SD = 3.22	unspecified	Percived economic status --> Patients: Very good 17.6%; moderate 79.6%; Bad 3.1%; Partners: Very good 9.9%; moderate 82.4%; Bad 7.6%	Israel	married or cohabiting. Relationship mean lenght 27.82; SD = 12.16	Mean number of children 2.96 SD = 1.32
2020	Tian, X., & Solomon, D. H. (2020). A relational turbulence theory perspective on women’s grief following miscarriage. Journal of Social and Personal Relationships, 37(6), 1852–1872. https://doi.org/10.1177/0265407520910792	193 women who had experienced a miscarriage within the previous 12 months; an average age of 30.54 years (SD = 3.44, range: 19–42)	(X) women	in a cross-sex relationship	unspecified	majority of the participants (95.3%) were White	unspecified	unspecified	unspecified	unspecified	U.S.	Most participants (97.4%, n = 188) were married, and those marriages were an average of 4.87 years in length (SD = 2.27); participants who were in a domestic partnership (2.6%, n = 5) were together for an average of 2.40 years (SD = 0.55)	X average time since the miscarriage was 5.95 months (SD = 2.33), and respondents were pregnant for an average of 5.98 weeks (SD = 6.51) when miscarriage occurred
2020	Roddy, M. K., Doss, B. D., (2020) Relational and psychological mediators of change in low-income couples' perceived health. Pers Relationship; 27: 571– 591. https://doi.org/10.1111/pere.12332	742 couples. participants were 33.19 years old (SD = 8.51) on average	female (52.5%)	unspecified		White non-Hispanic (55.3%) Black (24.5%), White Hispanic (9.4%), biracial (5.9%), Asian (1.1%), Black Hispanic (1.1%), American Indian or Alaskan Native (1.0%), and Native Hawaiian or Pacific Islanders (0.3%) 1.3% Other	unspecified	5.5% no degree, 8.8% general education development or equivalent, 6.8% vocational or technical certification, 14.7% having a high school diploma. 23.2% some college but no degree completion , 8.6% Associate's degree, 11.5% Bachelor's degree, and 4.6% graduate degree	Less than half of the sample was employed full time at enrollment (43.7%); 27.4% were unemployed, 15.4% were working part time, 7.4% were working temporarily/seasonally, and 6.1% were employed with variable hours	X Median household income was $27,000 (M = $29,046, SD = $16,671, range = $6,000 to $108,000). Thus, 41.8% of couples were at or below the federal poverty line and 85–100% of the sample was at or below 200% of the federal poverty line	U.S.	married (52.0%) while the remainder were either engaged (25.3%) or cohabiting for 6 months or longer (22.7%). Average relationship length was 6.14 years (SD = 5.32; range = 0–38 years)	unspecified
2020	August, K. J., Franks, M. M., Rook, K. S., & Stephens, M. A. P. (2020). Spouses' responses to the dietary nonadherence of their partners managing diabetes. Personal Relationships, 27(2), 401–419. https://doi.org/10.1111/pere.12320	128 couples: Patients receiving medical care for type 2 diabetes with their nondiabetic spouses. On average, patients were 65.98 years old (SD = 7.70; range: 55–85), and spouses were 65.99 years old (SD = 8.75; range: 46–89)	Half of the patients (n = 64) and spouses (n = 64) were female	heterosexual	X type 2 diabetes	A majority of patients (74.2%) and spouses (76.4%) identified as non-Hispanic White, with 24.2% of patients and 22% of spouses identifying as being African American/Black, and the remaining 1.6% of patients and spouses identified as other races/ethnicities (Hispanic, American Indian/Alaskan Native, or Asian)	unspecified	Over half of patients (59.4%) and spouses (60.2%) had more than a high school education	unspecified	unspecified	Midwestern U.S.	couples were married, on average, for 37.82 years (SD = 13.84), most lived alone together in their household (81%)	unspecified
2020	Ross, A. M., DeVoe, E. R., Steketee, G., Emmert-Aronson, B., Brown, T., & Muroff, J. (2020). Outcomes of a reflective parenting program among military spouses: The moderating role of social support. Journal of Family Psychology, 34(4), 402-413. doi:http://0-dx.doi.org.opac.unicatt.it/10.1037/fam0000637								X military families
2020	Brock, R. L., Franz, M. R., & Ramsdell, E. L. (2020). An integrated relational framework of depressed mood and anhedonia during pregnancy. Journal of Marriage and Family, 82(3), 1056–1072. https://doi.org/10.1111/jomf.12611	206 parents first-time parents (103 couples)	(X) 103 fathers and 103 mothers	heterosexual	unspecified	largely White	unspecified	unspecified	unspecified	middle-class background	northeast Ohio U.S.	Couples were either married or cohabiting. On average, had been married/cohabiting for about 3 years (M = 3.38, SD = 2.16)	X new parents: at the third trimester of pregnancy (104 complete couples), 1 month postpartum (93 complete couples), 4 months postpartum (86 complete couples), and 9 months postpartum (83 complete couples)
2020	Neff, L. A., Nguyen, T., & Williamson, H. C. (2020). Too Stressed to Help? The Effects of Stress on Noticing Partner Needs and Enacting Support. Personality & social psychology bulletin, 146167220974490. Advance online publication. https://doi.org/10.1177/0146167220974490	121 Newlywed couples. Husbands were 29.0 (SD = 5.0) years old and wives were 27.2 (SD = 4.8) years old on average	(X) 121 husband and 121 wives	heterosexual	unspecified	husbands: 78.4% White, 3.0% Hispanic/Latino, 2.2% African American, 13.4% Asian American, 3.0% Other; Wives, 75.4% White, 3.0% Hispanic/Latina, 1.5% African American, 14.9% Asian American, 5.2% Other	unspecified	husbands, 25.0% high school diploma, 11.4% associate’s/vocational degree, 51.5% bachelor’s degree, 9.1% master’s degree, and 3.0% PhD, MD, or DDS. wives’ 16.4% high school diploma, 10.4% associate’s/vocational degree, 56.7% bachelor’s degree, 14.2% master’s degree, and 2.2% PhD, MD, DDS	A majority of husbands and wives were employed full-time (77.6% and 70.1%, respectively)	Husbands and wives reported a median annual income of US$30,000 to US$35,000 and US$25,000 to US$30,000, respectively. Responses ranged from less than US$5,000 to more than US$50,000 (i.e., the top category) for both spouses	U.S.	(X) newlywed	unspecified
2020	Hammond, M. D., & Overall, N. C. (2020). Men’s Hostile Sexism and Biased Perceptions of Partners’ Support: Underestimating Dependability Rather Than Overestimating Challenges to Dominance. Personality and Social Psychology Bulletin, 46(10), 1491–1506. https://doi.org/10.1177/0146167220907475	100 heterosexual couples. primarily young adults (men: Mage = 23.31, SD = 7.24; women: Mage = 21.97, SD = 5.65)	x 100 men, 100 women	heterosexual							New Zealand (Oceania)	established relationships (Mlength = 3.25 years, SD = 2.00; 50% living together or married)		X Hostile Sexism
2020	Pagani, A. F., Parise, M., Donato, S., Gable, S. L., & Schoebi, D. (2020). If You Shared My Happiness, You Are Part of Me: Capitalization and the Experience of Couple Identity. Personality and Social Psychology Bulletin, 46(2), 258–269. https://doi.org/10.1177/0146167219854449	Study 1 90 couples (n = 180 subjects). Age range 23-64 years (women: M = 42.77, SD = 9.89; men: M = 44.36, SD = 10.09)	(X) 90 male and 90 female	heterosexual	unspecified	unspecified	92.2% women and 79.2% men Catholic, 7.7 % of women and 20.8 % of men no religious affiliation	About half of partners (women: 53.3%; men: 53.9%) reported a technical school diploma or a high school diploma	unspecified	The modal personal net income was between 1,000 and 1,500 Euro per month for both women (31 %) and men (33.8%)	italy	cohabitating. 73 couples were married (Mrelationship duration = 17.77 years, SD = 11.50), whereas 17 couples were unmarried (Mrelationship duration = 5.30 years, SD = 5.79)	unspecified
2020	Brock, R. L., Ramsdell, E. L., Franz, M. R., & Volk, S. (2020). Validation of a behavioral coding system for measuring mutually responsive orientation in intimate relationships. Psychological Assessment, 32(8), 713-725. doi:http://0-dx.doi.org.opac.unicatt.it/10.1037/pas0000826
2020	Kızılırmak, A., Calpbinici, P., Tabakan, G., & Kartal, B. (2020). Correlation between postpartum depression and spousal support and factors affecting postpartum depression. Health care for women international, 1–15. Advance online publication. https://doi.org/10.1080/07399332.2020.1764562
2020	Tomlinson, J. M., Feeney, B. C., & Peters, B. J. (2020). Growing into retirement: Longitudinal evidence for the importance of partner support for self-expansion. Psychology and Aging, 35(7), 1041-1049. http://0-dx.doi.org.opac.unicatt.it/10.1037/pag0000560
2020	Vowels, L. M., & Carnelley, K. B. (2020). Attachment styles, negotiation of goal conflict, and perceived partner support during covid-19. Personality and Individual Differences, http://0-dx.doi.org.opac.unicatt.it/10.1016/j.paid.2020.110505
2020	Carriere, J. S., Lazaridou, A., Martel, M. O., Cornelius, M., Campbell, C., Smith, M., Haythornthwaite, J. A., & Edwards, R. R. (2020). The moderating role of pain catastrophizing on the relationship between partner support and pain intensity: a daily diary study in patients with knee osteoarthritis. Journal of behavioral medicine, 43(5), 807–816. https://doi.org/10.1007/s10865-019-00121-5
2020	Ilska, M., & Przybyła-Basista, H. (2020). The role of partner support, ego-resiliency, prenatal attitudes towards maternity and pregnancy in psychological well-being of women in high-risk and low-risk pregnancy. Psychology, health & medicine, 25(5), 630–638. https://doi.org/10.1080/13548506.2020.1737718
2020	Gao, L., Jun‐E Liu, Xue‐Ping Zhou, Ya‐Li Su, & Pi‐Lin Wang. (2020). Supporting her as the situation changes: A qualitative study of spousal support strategies for patients with breast cancer in China. European Journal of Cancer Care, 29(1)http://0-dx.doi.org.opac.unicatt.it/10.1111/ecc.13176	(X) focusing on spouses			(X) breast cancer						(X)
2020	Marini, C. M., Ermer, A. E., Fiori, K. L., Rauer, A. J., & Proulx, C. M. (2020). Marital quality, loneliness, and depressive symptoms later in life: The moderating role of own and spousal functional limitations. Research in Human Development. Advance online publication. https://doi.org/10.1080/15427609.2020.1837598	(x) older adults	(x) male and female
2020	Rapelli, G., Donato, S., Bertoni, A., Spatola, C., Pagani, A. F., Parise, M., & Castelnuovo, G. (2020). The Combined Effect of Psychological and Relational Aspects on Cardiac Patient Activation. Journal of clinical psychology in medical settings, 27(4), 783–794. https://doi.org/10.1007/s10880-019-09670-y
2020	Tian, X., & Solomon, D. H. (2020). Grief and Post-traumatic Growth Following Miscarriage: The Role of Meaning Reconstruction and Partner Supportive Communication. Death studies, 44(4), 237–247. https://doi.org/10.1080/07481187.2018.1539051
2020	Johnson, M. D., Somerville, S. D., Galambos, N. L., & Krahn, H. J. (2020). Stuck in the middle with you: Predictors of commitment in midlife. International Journal of Behavioral Development, 44(3), 273–278. https://doi.org/10.1177/0165025419885025
2020	Woods, S. B., Priest, J. B., & Roberson, P. (2020). Family versus intimate partners: Estimating who matters more for health in a 20-year longitudinal study. Journal of family psychology : JFP : journal of the Division of Family Psychology of the American Psychological Association (Division 43), 34(2), 247–256. https://doi.org/10.1037/fam0000600
2020	Whitton, S. W., McLeish, A. C., Godfrey, L. M., James-Kangal, N., & Rhoades, G. K. (2020). Partner Assisted Smoking Cessation Treatment: A Randomized Clinical Trial. Substance use & misuse, 55(8), 1228–1236. https://doi.org/10.1080/10826084.2020.1731548
2020	O'Bertos, S. E., Holmberg, D., Shields, C. A., & Matheson, L. P. (2020). Partners’ attachment styles and overprotective support as predictors of patient outcomes in cardiac rehabilitation. Rehabilitation Psychology, 65(3), 258–267. https://doi.org/10.1037/rep0000331
2021	Franz, M. R., Brock, R. L., & DiLillo, D. (2021). Trauma symptoms contribute to daily experiential avoidance: Does partner support mitigate risk? Journal of Social and Personal Relationships, 38(1), 322–341. https://doi.org/10.1177/0265407520963186	159 heterosexual pregnant couples. women M = 28.67 years old (SD = 4.27), men m = 30.56 years old (SD = 4.52)	X 159 women and 159 men	heterosexual	X daily experiential avoidance (EA) associated with trauma symptoms	Most participants identified as White (89.3% of women; 87.4% of men); 9.4% of women and 6.4% of men identified as Hispanic or Latina/o	unspecified	The modal education was a bachelor’s degree (46.5% of women; 34.6% of men)	unspecified	Couples reported a median joint income of $60,000–$69,999 and the majority of participants were employed at least 16 hours weekly (74.2% of women; 91.8% of men)	unspecified	cohabitating in a committed intimate relationship. Average relationship length was 81.90 months (SD = 49.59), and average cohabitation was 61.00 months (SD = 41.80)	X All pregnant couples both biological parents of the child. The majority of women were in their second (38.4%) or third (58.5%) trimester of pregnancy (mean week of pregnancy ¼ 28.23, SD ¼ 7.54), and 57.9% reported they had no children.
2021	Kent de Grey, R. G., Berg, C. A., Tracy, E. L., Kelly, C. S., Lee, J., Lichtman, M. L., Butner, J., Munion, A. K., & Helgeson, V. S. (2021). Can’t you see I’m trying to help? Relationship satisfaction and the visibility and benefit of social support in type 1 diabetes. Journal of Social and Personal Relationships, 38(3), 805–824. https://doi.org/10.1177/0265407520973762	199 couples: persons with Type 1 Diabetes (PWD) and their spouses. (X) The average age for PWD was 46.82 (SD 13.95, range 25.85–74.89) and 46.40 years (SD 14.17, range 23.92–76.70) for partners	(X) Most patient (52.27%) and 47.24% of partners identified as female	Couples were primarily mixed-gender (n = 193), with 3 female and 3 male same-gender couples	199 couples: persons with Type 1 Diabetes (PWD) and their spouses	X Participants were primarily White (PWD 92.46%, partners 93.97%). Six percent of PWD and 3% of partners identified as Hispanic	unspecified	unspecified	unspecified	unspecified	Utah, Salt Lake City & Pittsburgh	married/cohabiting for at least 1 year	unspecified
2021	Zhou, J., Bhatia, V., Luginbuehl, T., & Davila, J. (2021). The association between romantic competence and couple support behaviors in emerging adult couples. Journal of Social and Personal Relationships, 38(3), 1015–1034. https://doi.org/10.1177/0265407520980533	X 89 mixed-gender college-aged couples, ages of 18 and 25 years of age. The mean age of men participants was 20.65 years (SD = 1.82) and the mean age of women participants was 20.16 (SD = 1.63)	89 males and 89 females	heterosexual	unspecified	52.8% of men described themselves as Caucasian, 22.5% as Asian/Pacific Islander, 15.7% as Latino, 4.5% as Middle Eastern, 3.4% as Black/African American, and 1.1% as another ethnicity, and 41.6% of women described themselves as Caucasian, 33.7% as Asian/Pacific Islander, 11.2% as Latina, 5.6% as Black/African American, and 7.8% as another ethnicity	unspecified	unspecified	The vast majority of participants were students, with only four women and four men (4.5% each) indicating that they were not enrolled in school.	unspecified	public university in the Northeast United States	(X) in a committed relationship for a minimum of 3 months, unmarried. The average relationship length was 73.9 weeks (SD = 76.5 weeks)	(X) with no children
2021	Brazeau, H., & Lewis, N. A. (2021). Within-couple health behavior trajectories: The role of spousal support and strain. Health Psychology, 40(2), 125–134. https://doi.org/10.1037/hea0001050
2021	Brazeau, H., & Lewis, N. A. (2021). Within-couple health behavior trajectories: The role of spousal support and strain. Health psychology : official journal of the Division of Health Psychology, American Psychological Association, 40(2), 125–134. https://doi.org/10.1037/hea0001050
2021	Brazeau, H., & Lewis, N. A. (2021). Within-couple health behavior trajectories: The role of spousal support and strain. Health psychology : official journal of the Division of Health Psychology, American Psychological Association, 40(2), 125–134. https://doi.org/10.1037/hea0001050
2021	Leavitt, C. E., Siedel, A. J., Yorgason, J. B., Millett, M. A., & Olsen, J. (2021). Little things mean a lot: Using the biopsychosocial model for daily reports of sexual intimacy. Journal of Social and Personal Relationships, 38(3), 1066–1084. https://doi.org/10.1177/0265407520977665
2021	Franz, M. R., Brock, R. L., & DiLillo, D. (2021). Trauma symptoms contribute to daily experiential avoidance: Does partner support mitigate risk? Journal of Social and Personal Relationships, 38(1), 322–341. https://doi.org/10.1177/0265407520963186
2021	Vowels, L. M., Carnelley, K. B., & Rachel R.R. Francois‐Walcott. (2021). Partner Support and Goal Outcomes during COVID‐19: A Mixed Methods Study. European Journal of Social Psychology, http://0-dx.doi.org.opac.unicatt.it/10.1002/ejsp.2745
2021	Giff, S. T., Disabato, D. D., Renshaw, K. D., & Campbell, S. B. (2021). Longitudinal associations of global and daily support with marital status. American Journal of Family Therapy, http://0-dx.doi.org.opac.unicatt.it/10.1080/01926187.2021.1913667
2021	Baek, J., Youm, Y., & Kim, H. C. (2021). Gender differences in the longitudinal association between husbands' and wives' depressive symptoms among Korean older adults: the moderating effects of the spousal relationship. Quality of life research : an international journal of quality of life aspects of treatment, care and rehabilitation, 10.1007/s11136-021-02894-2. Advance online publication. https…		X older adults			X korean
2021	Khanna, T., Garg, P., Akhtar, F., & Mehra, S. (2021). Association between gender disadvantage factors and postnatal psychological distress among young women: A community-based study in rural India. Global public health, 16(7), 1068–1078. https://doi.org/10.1080/17441692.2020.1820066	X young mothers				X Indian					(X) rural India	Young women who were married before or after 18 years	those who gave birth to a male or a female infant
2021	Dailey, R. M., Zhang, Z., Kurlak, R., Lloyd, R., & Burdick, S. (2021). Romantic Partner Perspectives of the Relational Context of Weight Loss Support. Health communication, 1–10. Advance online publication. https://doi.org/10.1080/10410236.2021.1920712
2001	FEENEY, J. A., & HOHAUS, L. (2001). Attachment and spousal caregiving. Personal Relationships, 8(1), 21–39. https://doi-org.libdata.lib.ua.edu/10.1111/j.1475-6811.2001.tb00026.x	males age range: 19-69; M: 38.66. Female range: 18-60; M: 36.29	50% male; 50% female (assumed)	100% heterosexual (assumed)	not given	not given	not given	not finished HS: 44 husbands and 70 wives; completed HS: 156 husbands and 149 wives; tertiary degree: 157 husbands and 142 wives	unemployed: 32 husbands and 103 wives; manual or clerical work: 79 husbands and 104 wives; managerial or professional positions: 251 husbands and 155 wives.	not given	Australia	(x) all married	69% had children
2001	Kelly, S., & Floyd, F. J. (2001). The effects of negative racial stereotypes and Afrocentricity on Black couple relationships. Journal of Family Psychology, 15(1), 110–123. https://doi.org/10.1037/0893-3200.15.1.110		x			x (73 Black couples)				x
2001	Stander, V. A., Hsiung, P.-C., & MacDermid, S. (2001). The relationship of attributions to marital distress: A comparison of mainland Chinese and U.S. Couples. Journal of Family Psychology, 15(1), 124–134. https://doi.org/10.1037/0893-3200.15.1.124					x (Mainland Chinese and U.S. Couples)
2002	GREENE, K.; FREY, L. R.; DERLEGA, V. J. Interpersonalizing AIDS: Attending to the personal and social relationships of individuals living with HIV and/or Aids. Journal of Social & Personal Relationships, [s. l.], v. 19, n. 1, p. 5, 2002. Disponível em: https://search.ebscohost.com/login.aspx?direct=true&db=edb&AN=7898613&site=eds-live&scope=site. Acesso em: 10 maio. 2021.	introduction to a special issue article; no study done.				5
2002	Leslie, M. B., Stein, J. A., & Rotheram-Borus, M. J. (2002). The impact of coping strategies, personal relationships, and emotional distress on health-related outcomes of parents living with HIV or AIDS. Journal of Social & Personal Relationships, 19(1), 45.	female age range: 25-60; M: 37; SD: 5.3. Male age range: 27-70; M: 38; SD: 5.6	x (81% female; 19% male )	not given	not given	45% hispanic; 34% african american; 4% white; and 17% other ethnic groups	not given	55% were highschool graduates	not given	not given	NYC, NY, USA	not given	x 15% had one child; 30% had two children; 27% had three children; 14% had four children; 14% had five or more children
2002	Krause N, & Shaw BA. (2002). Negative interaction and changes in functional disability during late life. Journal of Social & Personal Relationships, 19(3), 339–359. https://doi.org/10.1177/0265407502193003	x (65 and older)	not found	not found	not found	not found	not found	x	retired	not found	US	not found	not found
2002	Rohrbaugh, M. J., Cranford, J. A., Shoham, V., Nicklas, J. M., Sonnega, J. S., & Coyne, J. C. (2002). Couples coping with congestive heart failure: Role and gender differences in psychological distress. Journal of Family Psychology, 16(1), 3–13. https://doi.org/10.1037/0893-3200.16.1.3	patients (M= 53.4 years; SD =10.1, range = 29–78) spouses (M=52.0 years, SD=10.8, range = 29–75)	x	heterosexual	Not specified	83% White and 11% African-American	Not specified	patients (75%) had at least a high-school education and nearly half (46%) had attended college.	Not specified	Median reported household income was approximately $35,000, with roughly 28% under $20,000 and 29% over $50,000.	Michigan	Couples had been married an average of 25.3 years (SD =13.6)	Not specified
[truncated: 212 more rows]
